# Supplementary material for: Shifting spatial patterns in German population trends: local-level hot and cold spots, 1990–2019
Source: Copernicus journal article supplement (doi:10.5194/gh-77-369-2022), 2022-09-23
Supplement: Supplementary file 1 [file gh-77-369-2022-supplement.zip]

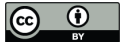

*Supplement of*

## **Shifting spatial patterns in German population trends: local-level hot and cold spots, 1990–2019**

**Tim Leibert et al.**

*Correspondence to:* Tim Leibert ([t\\_leibert@leibniz-ifl.de](mailto:t_leibert@leibniz-ifl.de))

- [gh-77-369-2022-supplement-title-page.pdf](#)
- [Rohdaten\\_BV-Entwicklung\\_1990-2019.xlsx](#)

The copyright of individual parts of the supplement might differ from the article licence.
