# Supplementary material for: Shifting spatial patterns in German population trends: local-level hot and cold spots, 1990–2019
Source: Copernicus journal article supplement (doi:10.5194/gh-77-369-2022), 2022-09-23
Supplement: Supplementary file 1 [file Rohdaten_BV-Entwicklung_1990-2019.xlsx]

## Sheet: 1990-2019
AGS	Name	2019	2018	2017	2016	2015	2014	2013	2012	2011	2010	2009	2008	2007	2006	2005	2004	2003	2002	2001	2000	1999	1998	1997	1996	1995	1994	1993	1992	1991	1990
1001000	Flensburg, Stadt	90164	89504	88519	87432	85942	84694	83971	83462	82801	88759	88502	88718	87792	86630	86080	85762	85300	84704	84480	84281	84449	84742	85547	86630	87276	87939	87994	87526	87241	86977
1002000	Kiel, Landeshauptstadt	246794	247548	247943	247441	246306	243148	241533	239866	237667	239526	238281	237579	236902	235366	234433	233329	233039	233270	232242	232612	233795	237337	240516	243728	246033	246586	248931	249199	247107	245567
1003000	Lübeck, Hansestadt	216530	217198	216318	216712	216253	214420	212958	211713	210679	210232	209818	210892	211541	211213	211825	211874	212754	213301	213496	213399	213326	214017	215376	215673	216986	216854	217269	217500	215999	214758
1004000	Neumünster, Stadt	80196	79487	79335	79680	79197	77588	77058	76951	77201	76830	76897	77100	77595	77936	78072	78555	78951	79544	79646	79831	80243	80803	81322	81796	82028	81996	82014	81810	81175	80743
1051001	Albersdorf	3708	3670	3717	3721	3482	3470	3433	3523	3500	3464	3445	3466	3433	3517	3564	3600	3572	3632	3614	3594	3489	3489	3525	3540	3528	3434	3386	3440	3329	3360
1051002	Arkebek	223	226	198	213	206	219	219	214	225	239	227	231	237	246	248	256	246	241	236	241	245	244	238	220	210	216	213	206	205	202
1051003	Averlak	554	557	566	576	584	586	581	615	610	599	622	622	631	619	642	647	662	658	646	663	667	669	679	660	664	674	647	640	626	614
1051004	Bargenstedt	962	964	939	912	917	943	929	910	912	917	908	908	920	911	936	908	913	936	928	935	924	928	896	880	903	914	896	893	873	853
1051005	Barkenholm	163	166	160	164	168	170	177	177	177	175	176	176	181	180	188	192	194	193	206	204	193	191	194	199	187	188	192	194	191	201
1051006	Barlt	752	763	763	749	802	798	794	805	799	795	809	806	824	830	850	864	868	906	881	850	859	870	873	874	862	843	832	837	813	825
1051008	Bergewöhrden	36	37	33	34	35	35	38	37	38	33	33	30	35	33	36	35	35	34	32	30	31	34	31	32	30	34	36	33	31	32
1051010	Brickeln	212	217	220	220	204	206	210	217	216	217	217	223	215	215	210	218	208	205	207	196	189	187	180	162	156	161	153	155	156	152
1051011	Brunsbüttel, Stadt	12380	12554	12704	12801	12740	12642	12721	12758	12734	13120	13228	13379	13494	13620	13751	13881	13925	13900	13902	13942	13976	14050	14084	14114	13966	13877	13771	13702	13534	13437
1051012	Buchholz	998	996	1010	1005	997	1003	1020	1037	1085	1076	1073	1083	1117	1129	1112	1115	1119	1110	1092	1109	1101	1092	1063	1045	1020	963	948	940	935	951
1051013	Büsum	4907	4928	4867	4852	4786	4733	4782	4808	4810	4987	4988	4904	4890	4867	4848	4828	4856	4808	4801	4764	4692	4636	4622	4604	4581	4622	4690	4764	4757	4803
1051014	Büsumer Deichhausen	358	364	361	360	352	355	371	371	366	332	330	338	338	348	353	351	353	358	356	360	386	359	349	349	347	340	324	311	307	311
1051015	Bunsoh	777	793	782	799	782	796	786	809	805	895	873	881	894	875	871	887	888	862	883	884	884	852	833	815	807	786	786	778	736	733
1051016	Burg (Dithmarschen)	4159	4142	4141	4128	4147	4185	4187	4260	4187	4237	4272	4219	4243	4294	4341	4363	4361	4402	4420	4483	4461	4465	4418	4418	4284	4280	4253	4187	4129	4101
1051017	Busenwurth	310	312	316	300	305	298	298	282	277	292	301	310	310	318	325	352	350	339	330	338	327	341	334	324	325	327	313	303	307	297
1051019	Dellstedt	736	745	741	740	746	734	736	751	774	788	809	797	798	801	800	787	787	782	799	823	822	822	819	824	807	823	800	800	779	764
1051020	Delve	735	700	696	678	685	676	696	698	711	717	721	726	730	730	729	734	707	709	733	740	739	718	703	710	725	719	730	727	729	711
1051021	Diekhusen-Fahrstedt	683	704	712	730	741	727	727	735	756	755	741	730	763	750	729	737	712	736	725	713	645	612	625	616	638	628	610	601	595	585
1051022	Dingen	627	628	621	620	615	630	642	639	659	670	685	680	674	715	710	716	693	707	704	703	667	641	654	658	638	640	632	644	624	636
1051023	Dörpling	618	624	602	610	609	614	603	601	604	635	627	650	658	619	619	631	617	630	629	633	629	629	635	631	605	602	594	590	597	582
1051024	Eddelak	1330	1335	1361	1363	1360	1373	1349	1405	1408	1367	1396	1391	1409	1453	1460	1459	1439	1423	1447	1436	1445	1472	1443	1459	1456	1453	1420	1443	1430	1431
1051026	Eggstedt	756	763	745	760	753	759	782	776	773	781	796	805	804	827	836	829	844	830	824	842	832	819	798	767	764	757	749	742	723	688
1051027	Elpersbüttel	844	867	865	862	873	857	870	869	883	872	903	919	917	909	913	917	890	873	848	806	791	766	752	752	737	741	738	723	728	732
1051028	Epenwöhrden	766	776	786	774	786	775	757	765	775	798	811	829	817	808	814	817	798	806	775	770	759	763	753	766	705	684	675	629	648	669
1051030	Fedderingen	280	279	286	285	275	281	269	266	274	283	285	286	287	278	282	268	263	267	265	266	272	275	262	255	259	245	243	235	233	230
1051032	Frestedt	350	349	344	360	363	374	378	378	381	370	379	379	383	383	398	386	386	387	396	396	382	387	382	359	351	331	343	339	339	328
1051033	Friedrichsgabekoog	53	53	54	54	53	52	49	51	53	55	56	64	65	66	70	75	75	88	84	88	82	89	84	91	97	97	93	102	103	99
1051034	Friedrichskoog	2539	2574	2570	2541	2565	2502	2475	2457	2492	2452	2450	2483	2469	2489	2511	2515	2447	2457	2440	2406	2430	2441	2401	2396	2420	2446	2436	2429	2429	2490
1051035	Gaushorn	173	167	170	174	179	194	186	180	178	198	210	208	213	213	203	211	211	210	208	202	206	215	212	209	194	204	183	186	202	191
1051036	Glüsing	111	112	110	124	116	117	116	111	116	118	122	113	111	107	112	118	117	108	101	114	119	119	113	119	111	117	103	103	95	103
1051037	Großenrade	454	462	470	477	483	489	490	485	490	516	525	513	527	522	529	520	527	504	485	492	484	460	447	448	452	451	444	444	438	445
1051038	Groven	84	72	86	88	87	79	80	77	79	131	142	128	130	129	122	128	126	132	116	128	130	136	137	127	124	127	131	136	128	123
1051039	Gudendorf	390	391	376	382	392	388	379	386	392	415	398	413	427	425	427	427	432	421	417	416	405	398	386	398	403	397	395	386	389	390
1051043	Hedwigenkoog	214	215	216	211	212	236	236	238	247	274	274	282	271	280	270	260	269	271	259	248	248	247	254	260	270	278	287	271	274	263
1051044	Heide, Stadt	21852	21684	21699	21529	21422	21303	21105	20894	20773	20886	20747	20821	20827	20695	20745	20515	20524	20445	20523	20530	20709	20719	20903	20708	20633	20721	20743	20721	20693	20659
1051045	Hellschen-Heringsand-Unterschaar	167	168	170	177	182	169	169	180	173	181	187	175	179	183	167	170	167	159	159	158	155	155	157	154	155	158	155	151	159	159
1051046	Helse	828	829	836	851	868	853	865	900	931	946	919	927	951	946	950	947	973	956	917	900	910	928	916	878	860	882	884	872	883	869
1051047	Hemme	493	512	493	494	514	497	504	548	521	544	547	526	526	515	528	514	534	524	526	536	533	531	528	512	516	512	515	508	499	527
1051048	Hemmingstedt	2878	2873	2863	2863	2833	2876	2860	2892	2923	2901	2920	2940	2978	2957	2982	2988	3010	3034	3018	3029	3015	2959	2911	2888	2861	2874	2900	2893	2875	2872
1051049	Hennstedt	1975	1931	1940	1943	1949	1957	1939	1929	1954	1924	1928	1941	1925	1952	1885	1884	1848	1844	1835	1831	1800	1829	1782	1792	1781	1806	1751	1786	1786	1757
1051050	Hillgroven	58	60	65	75	71	75	73	69	75	83	81	82	84	83	85	85	81	84	84	83	85	80	84	85	83	85	85	91	88	90
1051051	Hochdonn	1059	1079	1101	1151	1147	1151	1174	1188	1183	1234	1249	1237	1237	1280	1268	1227	1237	1241	1225	1246	1238	1237	1214	1231	1191	1179	1199	1214	1178	1140
1051052	Hövede	60	60	61	64	60	61	61	61	70	65	65	60	61	64	59	67	72	70	66	63	66	70	73	74	67	66	64	62	63	61
1051053	Hollingstedt	303	291	293	300	303	314	304	308	312	318	313	325	334	329	334	341	346	340	351	360	351	337	349	353	336	344	342	358	352	352
1051054	Immenstedt	97	102	102	106	106	107	96	97	103	96	103	100	101	97	98	105	103	97	90	87	88	87	90	88	88	84	89	94	91	96
1051057	Kaiser-Wilhelm-Koog	348	354	359	349	338	341	342	345	361	375	376	389	396	390	370	375	375	385	388	372	357	361	334	326	322	315	332	344	348	358
1051058	Karolinenkoog	143	145	149	144	146	141	141	135	146	120	123	126	135	138	140	133	131	135	132	128	131	141	139	144	147	135	139	136	143	156
1051060	Kleve	390	400	418	426	427	430	431	430	439	419	429	450	433	439	453	445	442	452	448	438	432	425	423	426	422	421	431	439	422	423
1051061	Krempel	606	615	595	589	597	596	602	603	605	625	602	627	624	647	651	669	671	673	670	655	656	670	661	647	653	625	612	590	588	616
1051062	Kronprinzenkoog	803	817	811	823	814	816	827	813	823	892	888	879	886	923	950	952	966	947	957	990	1013	980	960	979	964	975	1002	1022	1005	1003
1051063	Krumstedt	471	495	510	500	505	502	505	504	524	532	533	541	551	543	562	551	539	547	556	538	538	539	535	510	521	535	531	532	520	527
1051064	Kuden	601	576	607	611	631	618	604	625	643	652	643	651	645	658	660	663	654	657	644	669	668	671	642	642	641	628	611	610	590	600
1051065	Lehe	1108	1100	1093	1062	1060	1056	1070	1063	1077	1063	1076	1085	1095	1116	1152	1157	1152	1149	1140	1122	1124	1074	1079	1075	1036	1040	1018	1028	1036	1015
1051067	Lieth	372	385	382	391	380	390	403	410	415	394	407	409	408	401	392	389	406	410	397	375	348	379	358	343	320	337	318	316	300	302
1051068	Linden	866	864	867	861	846	860	871	870	849	854	856	851	863	862	887	862	859	859	866	851	876	877	859	865	836	825	816	777	774	753
1051069	Lohe-Rickelshof	2095	2094	2075	2091	2096	2098	2072	2069	2044	2015	2062	2016	1990	1981	1946	1965	1982	1979	1940	1944	1971	1963	1955	1920	1864	1848	1816	1783	1780	1790
1051071	Lunden	1701	1702	1674	1700	1667	1707	1680	1737	1738	1631	1644	1599	1631	1635	1655	1662	1683	1715	1754	1748	1735	1788	1792	1907	1893	1941	1961	1949	1913	1882
1051072	Marne, Stadt	5951	5858	5832	5796	5690	5635	5590	5652	5631	5825	5874	5945	5939	5917	6013	6014	6016	6095	6154	6151	6032	6021	6086	6136	6032	6064	6002	5964	5971	5934
1051073	Marnerdeich	396	402	404	395	386	386	392	395	403	344	348	339	316	357	351	347	365	385	395	404	439	446	434	382	363	355	345	344	338	335
1051074	Meldorf, Stadt	7247	7204	7214	7299	7267	7216	7294	7223	7253	7416	7425	7479	7586	7551	7625	7725	7720	7721	7729	7678	7707	7682	7618	7504	7531	7423	7422	7297	7211	7207
1051075	Neuenkirchen	949	940	963	999	993	1000	1002	1012	1038	1007	1035	1035	1043	1042	1053	1028	1022	1003	1007	983	1008	977	975	973	967	951	934	924	908	917
1051076	Neufeld	594	595	574	584	602	605	609	588	628	620	649	642	658	669	656	659	672	676	659	671	667	668	661	676	663	666	672	676	677	676
1051077	Neufelderkoog	119	126	122	119	121	122	123	126	127	166	135	134	155	161	144	140	145	150	146	149	175	160	141	152	149	162	170	166	156	154
1051078	Nindorf	1153	1132	1145	1143	1153	1163	1168	1152	1147	1201	1209	1201	1167	1177	1162	1163	1140	1135	1156	1168	1163	1098	1076	1090	1081	1086	1033	1018	1023	1023
1051079	Norddeich	395	417	411	410	401	412	409	434	436	412	424	427	436	430	429	420	439	436	443	445	430	416	411	399	386	358	368	377	361	362
1051080	Norderheistedt	145	149	140	142	150	149	149	146	143	143	147	146	154	155	139	149	150	151	153	145	141	125	126	130	135	127	121	126	116	116
1051081	Norderwöhrden	257	261	267	269	291	287	300	296	294	281	279	282	284	286	289	283	295	305	294	297	302	303	303	307	306	307	302	303	298	296
1051082	Nordhastedt	2827	2844	2876	2827	2775	2784	2754	2751	2745	2747	2732	2761	2804	2790	2773	2761	2745	2726	2696	2693	2639	2592	2572	2504	2367	2379	2363	2341	2290	2290
1051083	Odderade	323	332	317	327	324	326	321	317	321	324	314	320	320	326	324	314	307	306	312	311	299	306	301	290	285	283	277	295	292	284
1051084	Oesterdeichstrich	275	262	269	249	259	275	254	236	244	278	288	295	297	297	276	261	270	266	265	280	274	263	265	243	246	239	238	237	235	240
1051085	Offenbüttel	251	256	267	264	262	263	265	268	273	293	293	289	290	294	285	285	292	290	282	289	292	294	285	280	283	293	294	291	299	293
1051086	Osterrade	413	412	417	406	406	412	396	409	433	440	461	472	467	463	466	462	468	475	462	469	485	496	494	478	463	480	491	499	508	510
1051087	Ostrohe	915	937	951	939	949	934	943	945	959	943	935	946	952	959	963	966	964	956	948	940	937	924	917	860	841	854	856	840	803	782
1051088	Pahlen	1138	1149	1152	1199	1196	1199	1165	1169	1196	1207	1190	1189	1191	1154	1166	1160	1163	1121	1130	1101	1115	1135	1101	1097	1092	1030	1057	1045	1042	1033
1051089	Quickborn	189	189	192	179	184	197	184	181	193	205	184	205	222	229	197	207	210	211	215	215	208	208	179	175	172	179	185	181	163	173
1051090	Ramhusen	148	161	159	160	156	154	157	164	166	164	161	171	162	156	163	158	158	161	159	158	167	163	165	159	161	156	162	165	154	155
1051092	Rehm-Flehde-Bargen	515	508	511	512	522	503	496	528	517	548	557	571	604	612	603	616	623	627	616	623	637	619	620	569	552	572	552	557	551	529
1051093	Reinsbüttel	384	411	429	428	428	441	441	436	448	437	425	428	419	426	432	424	428	441	431	429	424	418	387	386	393	379	380	386	374	384
1051096	Sankt Annen	325	331	322	325	322	314	321	329	331	321	327	340	344	345	349	353	343	343	358	352	358	349	335	328	338	337	337	328	325	328
1051097	Sankt Michaelisdonn	3399	3410	3417	3420	3432	3501	3518	3499	3583	3635	3640	3626	3641	3680	3700	3758	3779	3796	3822	3749	3729	3751	3717	3722	3737	3684	3644	3636	3590	3585
1051098	Sarzbüttel	696	692	695	690	702	710	709	705	730	731	732	724	708	725	731	734	725	716	712	702	723	715	693	683	663	659	625	607	603	602
1051099	Schafstedt	1248	1262	1254	1285	1266	1279	1307	1314	1355	1326	1341	1334	1346	1364	1354	1359	1335	1336	1327	1315	1304	1282	1257	1236	1218	1199	1179	1183	1190	1158
1051100	Schalkholz	585	585	587	588	586	590	602	594	597	592	592	584	592	609	593	592	593	585	590	569	570	563	544	537	508	526	504	504	491	486
1051102	Schlichting	236	223	240	246	252	243	233	231	224	220	234	239	253	246	240	247	244	250	241	250	252	245	251	254	249	244	255	259	243	242
1051103	Schmedeswurth	178	176	183	187	190	195	195	197	195	206	210	217	209	209	214	211	202	202	210	219	219	225	216	221	215	222	232	224	227	227
1051104	Schrum	72	63	69	65	68	71	71	72	79	74	80	82	82	77	77	78	70	72	84	83	80	81	84	83	76	65	72	78	76	76
1051105	Schülp	396	395	403	408	414	426	454	452	475	467	466	474	491	489	491	472	480	477	469	452	475	472	473	488	484	481	485	472	444	445
1051107	Stelle-Wittenwurth	413	426	421	408	426	428	443	455	458	487	483	464	474	472	484	478	473	479	492	516	506	492	488	459	425	435	430	426	412	391
1051108	Strübbel	85	89	86	87	89	82	85	86	87	83	92	94	96	99	95	91	87	90	88	88	89	82	85	89	86	85	88	87	94	99
1051109	Süderdeich	472	471	474	472	488	467	467	463	472	505	505	515	507	518	532	535	536	540	546	550	529	511	527	508	499	503	507	498	491	452
1051110	Süderhastedt	755	784	808	836	829	843	867	843	860	866	859	869	855	878	872	865	861	862	881	873	862	846	829	809	789	783	776	778	785	780
1051113	Wöhrden	1260	1279	1247	1239	1247	1262	1259	1290	1308	1325	1325	1328	1319	1326	1339	1339	1348	1361	1358	1385	1373	1357	1310	1277	1242	1230	1186	1173	1151	1132
1051114	Tellingstedt	2678	2628	2599	2638	2658	2697	2627	2651	2629	2477	2538	2497	2523	2529	2500	2503	2574	2567	2626	2579	2582	2574	2509	2504	2464	2449	2375	2291	2250	2225
1051117	Tielenhemme	161	172	166	167	171	167	174	173	163	130	144	164	164	165	175	179	176	172	172	173	167	167	172	186	177	176	165	156	160	154
1051118	Trennewurth	253	243	244	253	250	249	255	253	259	263	262	260	257	268	267	272	291	288	297	300	299	296	294	291	301	315	298	318	308	307
1051119	Volsemenhusen	330	344	355	351	348	352	364	352	349	361	352	363	366	364	368	366	365	385	381	374	387	371	373	364	360	365	376	388	403	394
1051120	Wallen	32	32	34	37	40	32	36	32	33	32	33	34	36	37	35	36	40	39	35	34	32	36	38	34	33	31	29	26	33	28
1051121	Warwerort	235	234	236	245	253	250	245	245	244	292	298	304	316	303	294	266	261	241	224	207	207	201	211	222	229	223	215	215	212	207
1051122	Weddingstedt	2303	2303	2326	2326	2289	2279	2291	2280	2295	2264	2291	2303	2319	2336	2325	2331	2298	2363	2349	2357	2365	2349	2315	2246	2179	2148	2014	1990	1951	1955
1051125	Welmbüttel	428	422	432	436	429	439	462	459	457	456	453	467	487	461	472	452	474	457	454	425	415	409	410	395	401	404	397	392	372	357
1051126	Wennbüttel	84	91	92	88	86	87	85	87	91	78	79	80	84	84	79	76	80	85	88	87	81	77	77	74	68	72	74	73	81	81
1051127	Wesselburen, Stadt	3415	3372	3336	3287	3149	3004	3006	3003	3025	3042	3042	3020	3077	3077	3093	3123	3136	3126	3208	3269	3278	3356	3377	3349	3338	3291	3261	3246	3194	3179
1051128	Wesselburener Deichhausen	104	107	107	104	107	115	123	129	125	145	146	139	145	146	144	138	142	134	146	148	142	137	137	130	133	125	128	130	121	127
1051129	Wesselburenerkoog	178	175	164	162	157	173	167	164	147	123	123	130	131	148	156	159	150	151	159	152	177	179	198	208	216	227	231	237	237	222
1051130	Wesseln	1433	1447	1439	1418	1405	1417	1418	1403	1402	1383	1375	1398	1369	1349	1340	1373	1360	1323	1343	1336	1342	1311	1304	1313	1309	1295	1279	1205	1179	1099
1051131	Westerborstel	95	93	100	106	106	106	108	112	116	109	104	108	104	106	101	94	95	95	83	81	79	84	83	91	86	86	90	89	87	85
1051132	Westerdeichstrich	874	867	866	879	849	848	855	831	840	933	936	943	940	931	896	930	917	908	892	858	873	879	861	852	864	868	891	877	849	878
1051133	Wiemerstedt	151	151	152	154	160	154	157	160	159	159	164	164	159	167	166	172	169	170	182	177	178	170	171	163	155	149	160	162	162	153
1051134	Windbergen	792	781	790	804	812	808	808	822	820	833	846	839	839	842	840	846	835	831	811	782	799	804	792	764	748	744	713	705	708	703
1051135	Wolmersdorf	317	323	330	327	330	333	342	349	338	325	330	336	329	332	346	335	341	327	317	325	324	314	309	313	314	303	293	293	303	297
1051136	Wrohm	706	677	691	677	704	699	678	679	683	718	721	707	714	738	720	743	756	772	763	749	743	735	726	721	720	727	727	704	715	690
1051137	Nordermeldorf	604	591	586	591	604	587	596	584	604	628	631	647	665	666	663	668	670	663	672	651	656	668	666	658	648	647	635	632	622	615
1051138	Tensbüttel-Röst	670	666	674	671	645	649	670	698	687	683	697	711	705	691	701	698	708	700	678	690	670	686	671	656	621	570	557	555	536	521
1051139	Süderdorf	345	346	352	361	354	354	374	360	372	373	379	382	399	389	396	403	396	393	389	385	384	378	372	386	384	381	381	373	374	371
1051140	Oesterwurth	248	251	253	257	257	259	266	269	269	252	262	265	270	275	274	268	268	270	269	277	263	277	286	304	302	304	315	297	299	280
1051141	Süderheistedt	537	522	554	552	566	539	551	551	563	577	592	602	595	597	602	615	613	614	604	588	557	588	572	591	565	532	534	516	497	500
1053001	Albsfelde	70	73	74	72	76	76	72	67	66	61	57	57	59	54	59	53	47	52	56	59	58	62	62	60	67	68	61	62	58	60
1053002	Alt Mölln	848	885	893	910	896	890	855	876	865	903	900	862	850	869	871	858	852	844	827	794	774	805	813	809	833	823	816	788	771	720
1053003	Aumühle	3265	3275	3203	3133	3156	3178	3184	3153	3162	3011	3023	3024	3086	3108	3105	3077	3021	3026	3051	3023	3004	3075	3109	3121	3147	3213	3264	3343	3392	3365
1053004	Bäk	886	880	900	875	881	880	871	875	870	827	828	830	836	842	817	806	807	788	785	768	716	710	714	712	728	712	720	714	705	695
1053005	Bälau	230	231	230	215	234	228	229	252	245	238	237	238	237	254	246	235	244	246	251	241	241	242	253	252	239	232	226	220	214	209
1053006	Basedow	653	647	653	662	651	657	659	650	651	717	703	712	706	699	683	670	672	660	661	650	622	590	561	541	525	522	481	472	461	442
1053007	Basthorst	418	414	420	420	415	414	406	412	398	401	384	394	404	394	384	393	389	394	398	390	386	414	405	404	402	398	383	375	390	365
1053008	Behlendorf	381	388	391	395	399	398	372	391	376	389	387	395	394	394	397	383	373	354	330	339	345	372	367	354	370	355	340	342	348	330
1053009	Berkenthin	2082	2094	2102	2078	2075	2037	2062	2074	2070	2049	2072	2032	2069	2076	2092	1979	1943	1856	1857	1884	1872	1837	1796	1780	1663	1613	1557	1500	1446	1391
1053010	Besenthal	92	89	88	84	88	84	83	78	79	80	77	80	81	77	76	76	75	76	75	72	76	71	80	83	87	83	84	83	85	76
1053011	Bliestorf	663	651	642	630	626	641	643	639	668	665	689	668	671	695	699	705	682	665	643	646	650	650	630	594	570	549	498	499	493	489
1053012	Börnsen	4796	4764	4750	4623	4431	4439	4381	4330	4286	4107	4089	4028	3962	3864	3850	3848	3777	3744	3673	3649	3519	3422	3323	3301	3237	3221	3213	3222	3168	3206
1053013	Borstorf	300	305	299	301	279	269	270	277	280	289	296	290	282	292	308	308	300	309	317	319	314	313	306	313	293	268	263	261	265	266
1053014	Breitenfelde	1953	1939	1938	1937	1934	1904	1932	1899	1867	1788	1759	1781	1777	1789	1785	1802	1797	1802	1738	1679	1666	1666	1713	1666	1643	1642	1632	1643	1633	1641
1053015	Bröthen	311	318	304	297	292	276	278	275	279	271	277	274	276	274	279	265	269	258	255	250	231	232	231	241	227	225	224	210	216	212
1053016	Brunsmark	156	157	159	156	154	150	149	157	151	161	154	161	157	153	152	147	140	137	128	122	122	120	120	124	123	112	107	104	100	100
1053017	Brunstorf	738	735	725	679	632	632	639	641	632	638	638	628	639	623	624	612	579	572	538	510	503	487	446	443	450	451	434	434	435	451
1053018	Buchholz	240	241	239	240	235	239	230	231	239	237	235	227	236	232	245	234	224	221	215	226	234	224	231	227	230	231	238	225	226	213
1053019	Buchhorst	140	150	154	162	164	166	164	167	175	162	167	155	151	153	154	166	168	174	172	181	175	185	194	194	187	181	191	180	179	174
1053020	Büchen	6093	5855	5856	5808	5686	5698	5694	5671	5662	5614	5611	5633	5548	5483	5516	5492	5457	5473	5463	5490	5568	5530	5498	5518	5542	5536	5384	5217	5067	4889
1053021	Dahmker	139	144	147	151	150	161	165	152	159	157	156	155	155	156	152	151	145	134	133	132	128	122	121	122	122	117	112	110	100	95
1053022	Dalldorf	349	352	344	359	372	367	367	368	362	368	362	354	354	361	355	354	346	337	339	333	329	339	342	336	327	320	294	281	270	255
1053023	Dassendorf	3405	3334	3347	3323	3255	3178	3170	3181	3100	3112	3075	3114	3106	3079	3097	3084	3114	3080	3075	3058	3020	2999	3017	2997	2980	2901	2807	2701	2710	2709
1053024	Düchelsdorf	166	163	166	155	169	164	152	158	158	152	164	166	150	153	161	153	153	166	161	148	145	145	144	137	132	150	139	150	135	133
1053025	Duvensee	549	576	563	553	556	543	545	541	529	522	528	538	540	531	537	528	517	535	535	536	541	521	515	530	501	482	454	461	456	464
1053026	Einhaus	421	412	402	411	391	376	379	371	374	379	388	381	386	384	394	390	370	351	347	349	346	348	360	359	360	362	351	336	316	303
1053027	Elmenhorst	844	897	852	844	868	842	869	889	893	923	920	932	921	906	919	903	891	903	879	851	801	793	774	752	749	772	736	718	699	722
1053028	Escheburg	3461	3421	3406	3394	3431	3345	3334	3339	3354	3354	3327	3338	3262	3254	3157	2993	2884	2783	2690	2508	2398	2275	2158	2094	1984	1859	1747	1622	1569	1548
1053029	Fitzen	364	360	361	348	349	349	348	339	332	370	366	372	369	367	363	358	351	357	360	367	350	346	334	305	299	289	311	286	268	261
1053030	Fredeburg	41	39	38	40	42	45	47	46	40	35	37	44	39	40	39	33	35	31	32	34	37	40	40	41	48	44	39	45	48	40
1053031	Fuhlenhagen	386	383	386	356	348	348	335	315	284	297	292	296	306	305	296	294	298	305	297	310	321	308	306	311	295	292	280	277	269	272
1053032	Geesthacht, Stadt	30688	30551	30407	30453	30030	29676	29363	29098	28852	29228	29243	29258	29295	29348	29399	29464	29431	29391	29169	29106	29183	28937	28711	28219	27955	27991	27684	27254	26831	26246
1053033	Giesensdorf	150	149	147	153	153	136	133	118	125	107	93	91	88	92	97	94	97	101	105	104	103	111	118	111	100	98	101	96	94	86
1053034	Göldenitz	228	236	234	231	234	237	231	234	233	234	238	241	227	231	224	226	210	218	218	211	214	211	206	200	203	201	191	175	170	169
1053035	Göttin	65	70	67	61	62	56	57	53	60	45	50	48	50	48	55	54	49	46	48	54	53	51	51	50	46	48	53	55	59	53
1053036	Grabau	349	349	351	345	328	321	311	293	282	292	288	296	285	291	283	283	285	285	296	280	254	260	250	255	250	270	259	249	254	247
1053037	Grambek	492	490	474	452	460	427	418	414	419	418	408	406	424	409	402	395	394	399	397	384	384	381	381	381	368	367	358	346	337	338
1053038	Grinau	296	304	298	304	300	315	305	311	302	328	338	331	326	315	321	312	294	294	291	299	298	290	270	281	287	294	289	273	274	268
1053039	Groß Boden	209	204	202	215	202	199	197	192	192	214	217	215	216	210	212	214	211	211	214	210	209	209	211	217	209	210	207	207	209	205
1053040	Groß Disnack	84	86	84	82	79	85	83	79	82	84	86	86	89	85	90	92	92	91	92	93	103	100	101	97	92	85	87	85	85	88
1053041	Groß Grönau	3765	3755	3721	3722	3692	3648	3573	3595	3603	3535	3534	3545	3536	3547	3517	3506	3538	3575	3533	3574	3622	3693	3627	3670	3672	3684	3748	3745	3779	3811
1053042	Groß Pampau	149	146	152	156	153	151	147	149	151	136	138	134	129	134	127	124	128	129	127	121	122	117	104	109	107	107	115	116	106	107
1053043	Groß Sarau	1013	993	1002	978	961	949	937	902	880	930	921	910	912	897	875	894	892	866	891	899	839	825	830	819	817	804	815	798	753	760
1053044	Groß Schenkenberg	570	575	552	548	558	542	534	528	542	531	534	552	567	556	532	549	554	540	540	547	548	536	525	544	521	498	484	477	468	452
1053045	Grove	236	248	234	245	239	254	252	258	242	242	253	247	253	252	230	235	242	240	237	237	238	248	248	244	237	224	217	227	216	217
1053046	Gudow	1672	1649	1604	1579	1613	1633	1625	1658	1670	1620	1598	1616	1605	1637	1624	1695	1638	1608	1610	1627	1601	1636	1570	1560	1537	1532	1485	1457	1465	1408
1053047	Gülzow	1313	1321	1295	1243	1255	1249	1239	1239	1231	1245	1245	1238	1264	1288	1301	1294	1298	1307	1308	1272	1274	1249	1192	1095	1087	1041	1038	1045	997	1016
1053048	Güster	1300	1270	1278	1279	1261	1250	1230	1239	1267	1281	1264	1228	1226	1210	1203	1190	1181	1147	1107	1059	1039	949	893	878	855	839	843	822	788	740
1053049	Hamfelde	500	508	490	483	479	464	466	463	479	444	419	444	456	469	457	452	457	498	498	518	525	530	532	517	504	503	485	494	478	479
1053050	Hamwarde	867	870	863	845	843	839	785	766	756	759	766	780	770	764	758	752	747	745	740	760	752	750	733	733	733	721	725	719	723	711
1053051	Harmsdorf	326	317	318	312	308	309	310	294	290	284	271	262	282	263	244	237	209	211	219	225	232	231	241	239	263	268	267	274	265	269
1053052	Havekost	184	185	178	181	178	182	177	180	156	157	151	155	148	146	138	141	136	137	137	139	128	125	128	126	121	118	120	122	126	125
1053053	Hohenhorn	545	560	531	531	526	523	529	522	510	504	491	476	449	452	444	453	446	449	442	445	438	436	454	447	436	418	413	415	420	417
1053054	Hollenbek	434	426	417	418	432	423	426	415	443	439	445	448	426	431	441	453	456	456	465	438	437	447	410	404	401	408	404	401	402	382
1053056	Hornbek	188	190	190	195	188	185	178	186	199	175	181	167	174	176	186	190	183	183	184	191	188	193	189	185	170	180	168	166	164	173
1053057	Horst	207	204	204	202	211	211	221	232	235	236	237	241	243	245	247	256	240	238	231	240	245	240	266	262	266	266	247	251	245	252
1053058	Juliusburg	170	166	180	170	176	167	174	172	176	194	183	178	177	188	188	191	195	196	202	205	196	197	197	193	201	199	209	200	177	173
1053059	Kankelau	224	218	211	215	206	205	201	207	218	220	209	214	211	218	221	214	210	211	194	198	190	189	191	195	201	201	196	202	201	201
1053060	Kasseburg	578	575	584	583	592	590	587	570	569	537	528	523	523	535	536	537	559	564	563	553	567	559	575	558	553	552	546	511	508	508
1053061	Kastorf	1105	1120	1112	1136	1158	1159	1151	1177	1179	1190	1184	1192	1209	1203	1146	1162	1130	1115	1103	1058	1014	1011	984	892	832	838	789	679	642	623
1053062	Kittlitz	255	254	256	254	241	239	242	254	243	258	254	243	249	251	252	270	285	284	282	273	264	258	252	247	267	285	288	275	271	262
1053064	Klein Pampau	648	639	625	631	645	641	614	613	612	618	613	603	609	631	647	655	649	658	673	682	665	666	701	674	668	673	644	607	589	567
1053066	Klein Zecher	235	238	245	243	250	251	249	243	240	238	247	253	249	248	249	234	239	237	232	235	235	240	226	222	216	219	213	215	210	222
1053067	Klempau	611	611	623	620	641	611	626	626	610	622	621	625	610	623	620	602	604	601	551	539	545	552	555	544	551	539	559	550	557	551
1053068	Klinkrade	604	591	608	600	598	608	612	615	602	577	551	599	587	567	549	542	545	551	559	546	535	546	543	548	529	508	490	459	445	426
1053069	Koberg	783	771	774	783	749	763	752	761	764	759	772	772	751	760	740	734	736	745	738	737	685	678	664	637	640	605	545	544	548	525
1053070	Köthel	262	268	268	269	270	268	274	276	269	300	289	282	294	294	285	287	270	273	284	278	274	268	259	246	237	219	216	210	210	212
1053071	Kollow	609	605	586	613	598	577	588	597	604	632	642	642	644	651	658	646	663	665	641	636	624	609	601	650	656	651	584	614	592	602
1053072	Kröppelshagen-Fahrendorf	1330	1287	1308	1270	1270	1259	1217	1200	1164	1116	1110	1094	1091	1090	1070	1088	1096	1065	1059	1083	1062	1038	1021	1027	1009	997	963	932	930	927
1053073	Krüzen	346	368	383	380	368	353	362	369	358	352	350	348	346	340	348	358	324	325	318	304	300	308	288	299	289	277	276	276	268	261
1053074	Krukow	153	148	150	152	148	150	154	165	161	184	195	190	185	190	194	199	200	202	199	198	199	193	193	186	186	182	173	173	162	164
1053075	Krummesse	1718	1756	1756	1751	1772	1771	1717	1745	1751	1465	1489	1533	1503	1512	1551	1543	1554	1577	1518	1494	1462	1388	1355	1301	1339	1360	1436	1442	1487	1474
1053076	Kuddewörde	1372	1343	1377	1401	1383	1364	1339	1360	1344	1346	1341	1344	1348	1377	1341	1307	1316	1289	1305	1282	1275	1275	1265	1270	1257	1249	1223	1214	1208	1173
1053077	Kühsen	375	357	372	365	375	365	364	378	376	377	394	395	396	395	387	376	375	399	405	421	416	417	398	408	395	404	406	374	353	349
1053078	Kulpin	201	204	218	213	212	216	209	213	217	221	227	232	234	239	239	247	249	238	245	250	241	238	234	242	245	231	207	229	214	181
1053079	Labenz	852	842	840	850	850	839	843	842	848	852	848	829	851	855	836	825	822	805	799	766	727	693	689	672	650	604	571	556	531	526
1053080	Langenlehsten	147	158	151	160	163	151	157	167	169	154	163	161	162	164	160	157	167	170	168	164	151	144	133	127	116	110	115	109	112	114
1053081	Lankau	470	479	466	466	472	466	476	478	491	491	490	483	476	476	501	503	498	481	486	487	498	503	483	470	481	473	457	453	446	444
1053082	Lanze	286	289	292	293	280	294	281	280	279	397	401	392	398	383	392	400	381	332	309	294	273	268	259	282	281	296	270	243	184	191
1053083	Lauenburg/ Elbe, Stadt	11402	11444	11485	11498	11398	11277	11253	11150	11150	11220	11318	11436	11477	11591	11678	11737	11810	11807	11853	11834	11781	11859	11930	11890	11778	11557	11523	11505	11432	11330
1053084	Lehmrade	594	549	521	489	502	486	491	490	483	478	455	465	456	458	470	469	468	476	456	432	429	410	388	388	384	374	382	386	392	385
1053085	Linau	1252	1252	1244	1203	1198	1203	1167	1188	1199	1188	1184	1177	1174	1172	1145	1167	1157	1132	1122	1136	1123	1130	1140	1146	1125	1088	1042	964	921	896
1053086	Lüchow	276	286	287	290	298	279	277	298	285	198	206	221	224	199	197	213	224	211	197	206	193	216	218	219	210	192	193	202	194	191
1053087	Lütau	710	704	714	688	691	708	709	699	714	717	715	720	726	728	701	669	647	642	626	616	621	629	599	625	618	603	588	601	590	580
1053088	Mechow	127	129	127	122	114	115	114	110	110	108	103	95	93	90	91	94	97	96	102	102	105	99	86	87	89	93	92	92	89	93
1053089	Möhnsen	538	548	561	555	545	538	540	552	543	561	542	549	545	537	533	525	527	538	540	537	512	512	500	475	487	452	460	469	455	479
1053090	Mölln, Stadt	19131	19031	18928	18970	18856	18622	18520	18458	18409	18487	18492	18712	18742	18642	18478	18494	18427	18386	18381	18361	18412	18387	18457	18232	17996	17861	17795	17672	17518	17292
1053091	Mühlenrade	177	178	172	180	173	174	176	182	177	198	198	195	184	191	187	195	202	189	188	191	192	170	174	175	167	176	170	170	176	177
1053092	Müssen	1165	1141	1125	1119	1117	1038	984	1005	996	959	990	951	968	967	954	944	954	952	951	934	923	895	905	908	900	895	875	893	871	829
1053093	Mustin	734	728	729	751	761	756	754	726	757	722	721	719	675	694	702	700	696	689	673	669	672	676	695	683	650	648	641	630	624	614
1053094	Niendorf bei Berkenthin	196	192	190	191	192	203	193	191	195	194	188	186	185	185	189	190	184	183	194	191	185	170	151	143	131	134	137	136	137	145
1053095	Niendorf/ Stecknitz	653	660	661	652	643	641	641	659	647	608	603	599	597	632	630	626	614	625	634	608	626	613	586	540	530	515	510	503	503	504
1053096	Nusse	1135	1108	1091	1092	1072	1045	1053	1060	1084	1037	1034	1031	990	1010	1019	1036	1030	1043	1051	1054	1035	1029	977	979	960	911	880	873	866	852
1053097	Panten	654	662	638	641	633	612	635	608	637	708	696	699	693	689	718	713	711	676	678	674	655	647	645	640	635	638	609	593	550	538
1053098	Pogeez	495	494	479	438	416	394	381	395	381	354	356	372	384	381	381	394	409	389	397	395	403	404	382	408	410	405	397	391	373	360
1053099	Poggensee	351	362	367	354	349	354	335	349	341	342	345	352	361	360	344	343	341	328	340	338	332	329	340	333	322	337	325	304	290	270
1053100	Ratzeburg, Stadt	14525	14652	14595	14528	14230	14104	13866	13691	13613	13699	13699	13695	13820	13837	13785	13671	13558	13493	13295	13160	13071	13067	13048	13028	12755	12520	12458	12311	12237	12181
1053101	Ritzerau	295	305	313	309	281	284	275	284	274	281	285	282	280	277	286	294	309	302	279	290	304	293	287	286	306	283	260	248	246	242
1053102	Römnitz	58	58	61	55	55	59	61	53	54	59	66	63	69	61	62	71	75	71	69	71	73	74	75	70	67	66	61	55	48	47
1053103	Rondeshagen	812	816	814	824	810	830	834	807	832	846	838	831	847	854	868	851	851	809	805	796	769	774	751	747	713	726	739	724	688	683
1053104	Roseburg	530	531	543	523	518	520	535	525	504	505	511	512	512	516	512	500	491	488	472	475	469	467	465	450	450	447	440	445	435	429
1053106	Sahms	402	376	381	376	389	378	380	373	372	381	385	378	372	366	377	366	365	359	329	320	325	322	315	277	288	280	278	283	282	268
1053107	Salem	638	603	607	625	594	588	594	595	598	578	571	559	560	561	572	574	565	569	566	580	563	560	547	524	519	534	530	520	464	476
1053108	Sandesneben	1859	1829	1813	1822	1792	1805	1721	1685	1699	1681	1658	1645	1646	1623	1619	1635	1616	1612	1571	1448	1422	1300	1107	1089	1088	1079	1089	1109	1062	1054
1053109	Schiphorst	642	633	644	636	632	617	608	610	608	591	585	578	586	586	568	545	541	509	494	483	456	435	455	450	452	448	426	424	414	419
1053110	Schmilau	563	555	547	546	548	551	553	549	544	578	595	610	616	611	594	596	583	586	585	604	588	574	565	543	569	567	588	581	598	567
1053111	Schnakenbek	874	863	841	875	853	846	848	833	833	847	828	835	837	842	841	850	853	838	827	826	805	810	819	839	845	811	836	849	828	797
1053112	Schönberg	1366	1361	1360	1355	1376	1371	1391	1371	1382	1289	1278	1299	1317	1315	1296	1309	1296	1288	1292	1234	1222	1164	1182	1149	1098	1042	1039	1031	974	952
1053113	Schretstaken	489	507	515	510	516	511	502	473	485	512	519	516	520	505	511	515	515	519	504	483	476	466	470	461	477	462	485	478	468	472
1053114	Schürensöhlen	158	158	154	160	159	162	159	145	150	148	152	157	160	161	162	165	167	165	159	159	169	163	163	171	169	166	171	173	176	165
1053115	Schulendorf	448	469	467	466	454	452	459	444	459	488	486	483	478	475	474	433	444	436	420	431	423	427	408	423	403	394	393	392	374	377
1053116	Schwarzenbek, Stadt	16551	16447	16374	16261	15933	15523	15278	15060	14978	15074	14933	14949	14968	14890	14906	14899	14781	14730	14451	14090	13826	13395	13045	12584	12247	11788	11681	11662	11485	11435
1053117	Seedorf	501	503	506	519	512	522	532	531	542	519	530	528	517	518	531	528	552	563	561	536	539	513	519	526	539	524	506	519	501	517
1053118	Siebenbäumen	606	614	627	633	621	621	633	632	645	652	662	654	678	688	679	640	628	637	642	628	611	603	597	576	558	547	534	531	524	512
1053119	Siebeneichen	250	259	256	253	243	258	265	264	266	272	274	264	261	248	252	260	249	251	254	254	265	274	263	251	259	267	265	260	240	240
1053120	Sierksrade	433	421	408	381	385	381	367	350	352	331	332	325	305	307	308	303	313	297	293	294	305	320	328	314	309	314	334	320	299	293
1053121	Sirksfelde	338	333	323	318	325	326	322	325	318	293	294	313	302	316	322	310	319	322	328	334	330	325	311	295	293	290	267	250	259	244
1053122	Steinhorst	554	578	582	594	585	566	544	545	567	579	568	555	567	574	565	534	551	557	555	563	555	546	529	528	506	474	485	488	475	472
1053123	Sterley	932	937	926	931	921	903	915	938	947	967	969	957	970	950	980	964	949	957	968	913	922	886	841	846	840	833	830	814	797	796
1053124	Stubben	386	387	381	388	375	372	374	384	393	400	390	400	418	414	418	419	423	424	426	417	403	405	407	403	370	361	356	336	332	324
1053125	Talkau	516	521	522	522	518	513	514	528	517	529	530	533	531	532	528	527	515	488	481	498	501	501	507	512	489	485	463	463	435	420
1053126	Tramm	347	360	355	360	362	355	355	347	337	341	345	338	336	337	337	329	322	313	313	311	304	296	286	290	282	288	292	282	278	275
1053127	Walksfelde	235	240	228	214	216	210	189	182	181	182	190	176	191	185	191	193	200	186	183	184	190	191	161	158	171	161	146	153	149	130
1053128	Wangelau	221	223	226	212	211	218	224	217	231	207	212	210	209	207	207	240	229	227	235	234	229	232	225	225	219	221	224	231	231	224
1053129	Wentorf bei Hamburg	13439	13349	12930	12663	12550	12221	12104	11939	11833	11633	11592	11574	11614	11527	11470	11433	11363	11096	10354	9987	9163	8600	8703	8670	8736	8804	8878	8890	8736	8633
1053130	Wentorf (Amt Sandesneben)	732	722	719	734	741	707	689	682	688	672	692	695	697	703	703	720	711	687	659	651	641	610	615	597	583	585	518	498	497	500
1053131	Wiershop	204	199	195	198	192	180	159	160	164	160	160	159	177	167	173	166	159	170	166	156	155	163	157	157	159	157	155	151	144	145
1053132	Witzeeze	905	867	869	893	885	871	861	874	895	889	905	911	917	930	914	915	913	890	877	883	880	865	871	845	827	802	806	786	761	747
1053133	Wohltorf	2398	2414	2421	2429	2410	2411	2433	2391	2420	2335	2333	2386	2359	2317	2282	2296	2278	2308	2318	2297	2303	2311	2330	2382	2360	2391	2357	2415	2396	2370
1053134	Woltersdorf	305	290	284	289	294	302	308	291	293	261	273	265	270	275	278	276	275	278	269	269	253	252	247	253	246	242	253	255	246	249
1053135	Worth	189	185	178	176	168	170	170	171	166	160	160	170	160	168	169	177	165	166	177	184	173	188	188	193	190	192	186	195	187	186
1053136	Ziethen	1124	1116	1080	1010	990	1005	998	996	997	1011	975	999	1001	995	985	963	879	870	888	893	902	907	897	896	888	865	833	855	819	776
1054001	Achtrup	1524	1488	1487	1475	1458	1495	1493	1504	1513	1527	1529	1557	1556	1571	1558	1550	1543	1529	1518	1512	1489	1454	1435	1427	1394	1351	1352	1366	1352	1324
1054002	Ahrenshöft	515	516	516	520	526	508	506	494	505	523	523	524	511	513	523	527	522	527	518	513	495	476	468	459	455	438	428	415	417	420
1054003	Ahrenviöl	518	521	521	518	517	517	519	520	518	496	493	499	510	513	509	507	518	509	521	536	530	510	493	502	499	488	484	471	467	455
1054004	Ahrenviölfeld	220	220	228	236	245	244	225	236	250	265	263	269	265	259	269	267	273	273	270	259	265	267	266	264	247	247	244	237	229	226
1054005	Alkersum	391	410	392	417	420	428	414	434	428	423	419	411	410	405	426	422	423	434	445	445	463	455	466	436	415	421	385	389	377	378
1054006	Almdorf	543	561	543	552	561	555	545	539	555	551	535	557	547	541	541	532	531	514	529	524	514	526	495	463	464	452	437	443	433	436
1054007	Arlewatt	332	342	333	335	332	328	335	327	331	337	332	341	335	340	335	339	340	355	356	343	341	337	326	314	303	296	300	288	284	284
1054009	Aventoft	441	448	463	444	455	458	478	489	466	473	474	459	469	476	502	514	502	482	490	504	501	517	533	544	555	537	551	547	549	537
1054010	Bargum	620	627	625	619	612	596	594	590	608	602	597	606	610	616	614	614	618	634	615	638	627	599	603	611	594	595	611	605	583	600
1054011	Behrendorf	551	560	556	558	570	560	554	553	561	586	600	604	613	605	599	614	606	603	605	610	594	570	559	558	536	489	482	480	467	487
1054012	Bohmstedt	760	774	753	762	750	740	743	726	733	724	725	743	760	759	766	761	772	753	751	762	767	738	737	713	708	701	695	686	693	702
1054013	Bondelum	158	161	170	164	174	173	178	187	206	205	200	195	203	205	210	217	209	210	200	186	196	199	192	194	185	190	177	202	195	197
1054014	Bordelum	1999	2004	1976	2011	1998	1961	1978	2001	2023	2037	2045	2029	2025	2016	1999	1982	1992	1932	1945	1935	1920	1877	1867	1801	1803	1811	1804	1804	1767	1769
1054015	Borgsum	336	332	350	333	360	362	356	334	341	361	362	348	348	353	340	347	339	336	338	335	327	320	308	307	298	305	291	278	261	260
1054016	Bosbüll	249	239	222	221	204	199	194	200	215	223	220	222	222	211	204	205	206	201	194	195	179	182	187	191	188	196	187	180	170	180
1054017	Braderup	668	657	663	658	660	650	674	658	661	663	663	661	671	685	685	659	672	692	696	706	721	681	670	688	677	680	655	660	657	656
1054018	Bramstedtlund	222	216	210	201	207	200	206	205	192	214	220	220	229	227	232	234	252	246	253	246	248	245	250	244	233	243	236	235	235	229
1054019	Bredstedt, Stadt	5543	5429	5436	5432	5224	5135	5115	5100	5065	4926	4967	5006	5022	5050	5016	5059	5107	5068	5076	5035	5002	4979	5040	4951	4859	4850	4807	4800	4751	4687
1054020	Breklum	2330	2313	2362	2364	2348	2359	2343	2333	2359	2334	2311	2280	2322	2298	2338	2314	2315	2266	2277	2283	2241	2210	2124	2033	1968	1892	1795	1808	1783	1773
1054022	Dagebüll	884	896	881	887	908	899	912	920	917	890	899	904	927	948	935	948	946	944	964	966	960	950	955	980	983	1009	1033	1043	1053	1066
1054023	Drage	646	650	654	636	628	635	621	612	622	572	593	593	594	595	593	592	600	588	579	559	584	579	573	569	565	544	511	506	510	522
1054024	Drelsdorf	1255	1248	1266	1273	1259	1244	1225	1244	1253	1266	1306	1299	1284	1286	1291	1281	1265	1235	1181	1193	1158	1145	1154	1132	1136	1104	1061	1064	1031	996
1054025	Dunsum	65	71	72	74	77	71	70	67	67	64	64	62	65	67	81	82	89	84	78	79	80	84	86	85	87	84	83	82	79	80
1054026	Elisabeth-Sophien-Koog	49	53	43	48	46	45	43	41	40	46	47	48	45	45	48	45	46	46	44	43	42	41	43	44	46	48	52	47	50	50
1054027	Ellhöft	113	105	100	101	111	103	102	103	111	109	110	113	130	122	134	127	135	129	126	119	124	127	128	133	131	133	138	138	134	138
1054032	Fresendelf	89	93	94	94	97	103	93	96	97	100	97	94	96	94	91	93	93	87	95	93	95	100	95	99	97	98	97	89	89	86
1054033	Friedrichstadt, Stadt	2653	2578	2564	2523	2466	2491	2485	2490	2558	2411	2405	2416	2458	2492	2457	2453	2496	2445	2445	2434	2528	2567	2633	2634	2607	2603	2604	2603	2603	2584
1054034	Friedrich-Wilhelm-Lübke-Koog	179	177	176	166	167	177	188	187	185	168	163	161	160	157	155	161	173	173	162	157	179	180	191	196	205	211	215	189	210	218
1054035	Garding, Kirchspiel	277	295	319	333	375	381	380	389	397	350	329	344	330	311	329	316	297	296	280	272	275	240	254	242	217	239	251	258	273	290
1054036	Garding, Stadt	2818	2764	2719	2627	2597	2515	2536	2489	2472	2649	2675	2664	2666	2694	2685	2715	2713	2751	2736	2782	2746	2749	2708	2726	2687	2621	2590	2529	2415	2265
1054037	Goldebek	359	357	357	350	334	340	341	358	351	347	348	354	350	356	351	355	351	338	321	323	316	295	283	294	286	283	280	283	284	286
1054038	Goldelund	414	408	398	400	410	389	386	407	403	384	383	375	378	392	398	391	386	373	365	377	387	397	364	374	356	356	355	331	347	344
1054039	Gröde	10	7	9	9	9	9	9	11	11	8	10	11	13	13	13	14	14	13	13	12	12	12	11	11	12	14	15	14	16	16
1054040	Grothusenkoog	21	24	21	21	21	21	22	23	23	20	22	20	22	22	21	23	26	22	27	26	21	21	21	20	22	19	17	19	19	22
1054041	Haselund	882	879	857	860	884	889	898	920	905	899	910	916	927	917	899	890	871	867	869	867	848	826	800	825	783	757	752	719	702	696
1054042	Hattstedt	2556	2571	2568	2580	2557	2532	2546	2551	2565	2467	2484	2465	2467	2475	2473	2435	2399	2382	2376	2330	2271	2259	2209	2135	2124	2056	1978	1935	1933	1891
1054043	Hattstedtermarsch	272	274	269	288	290	285	300	295	304	333	324	327	318	325	323	307	302	310	317	334	336	342	345	344	327	334	340	334	329	325
1054045	Högel	468	471	462	463	455	455	454	474	461	446	448	446	446	445	452	461	448	434	437	428	429	436	426	405	414	386	369	371	364	371
1054046	Hörnum (Sylt)	893	887	916	886	902	837	847	863	882	1048	1026	981	1009	935	922	932	932	922	920	942	945	977	1013	1069	1033	994	1029	983	917	874
1054048	Holm	90	81	80	76	79	77	78	77	78	83	86	84	79	82	85	79	84	90	94	87	91	93	89	91	97	97	91	83	79	88
1054050	Hooge	103	92	98	102	95	105	103	109	106	83	76	80	72	81	83	85	90	89	103	96	108	97	98	104	108	113	116	120	123	125
1054052	Horstedt	805	790	776	786	786	764	755	739	721	753	747	756	745	754	750	748	743	753	758	730	710	677	673	663	636	600	594	594	603	593
1054054	Hude	182	178	169	166	186	187	189	175	194	190	194	201	206	208	195	188	198	210	227	233	224	219	216	203	202	204	209	213	191	182
1054055	Humptrup	757	741	725	735	710	725	735	727	717	765	765	763	767	790	768	757	762	745	727	720	711	713	715	688	679	670	638	668	661	655
1054056	Husum, Stadt	23189	23158	23274	23097	22430	22215	22053	22092	22135	22084	22216	22212	22327	22362	22544	22492	22493	22489	22579	22611	22759	22993	23180	23126	23114	23043	22958	22713	22602	22543
1054057	Immenstedt	634	639	633	673	693	688	659	670	681	670	658	663	669	658	650	647	628	640	643	637	625	605	571	569	550	535	552	555	556	542
1054059	Joldelund	727	716	723	715	715	732	743	750	761	727	708	718	722	722	741	725	731	719	699	707	686	684	686	649	630	630	635	619	624	612
1054061	Kampen (Sylt)	461	473	463	456	458	475	485	516	515	602	596	594	617	621	642	636	647	657	614	617	634	634	637	646	642	644	652	632	578	589
1054062	Karlum	212	218	215	217	205	213	208	209	219	215	220	222	233	216	213	225	222	235	238	224	235	239	229	210	224	232	225	222	221	215
1054063	Katharinenheerd	175	185	181	169	170	169	161	164	176	166	171	173	168	182	190	184	190	194	195	194	194	190	186	182	185	183	176	170	165	166
1054065	Klanxbüll	979	985	995	988	983	970	939	936	953	923	952	951	948	950	948	957	966	963	961	931	927	875	787	791	784	774	759	791	791	799
1054068	Klixbüll	1005	974	968	956	961	981	965	948	949	955	962	968	954	944	937	955	945	908	897	909	928	928	911	901	887	876	864	865	846	832
1054070	Koldenbüttel	898	916	907	924	926	922	918	921	917	912	932	935	940	928	933	918	930	930	938	916	869	809	787	779	754	730	716	708	698	690
1054071	Kolkerheide	63	61	59	51	54	49	49	55	55	59	65	65	64	63	64	65	68	68	68	70	73	79	72	70	71	70	71	71	71	67
1054072	Kotzenbüll	200	203	209	223	226	224	228	227	227	220	215	236	230	229	237	243	248	235	236	243	247	233	227	225	225	243	242	239	228	221
1054073	Ladelund	1334	1343	1370	1379	1372	1361	1384	1381	1387	1364	1399	1416	1489	1496	1524	1495	1499	1498	1506	1512	1472	1468	1412	1364	1365	1326	1255	1191	1199	1149
1054074	Langeneß	138	139	140	133	130	136	134	134	134	123	121	122	125	127	134	131	127	126	125	129	125	123	125	122	123	126	126	137	139	142
1054075	Langenhorn	3280	3280	3242	3193	3172	3117	3104	3111	3113	3091	3105	3102	3137	3134	3142	3147	3127	3128	3109	3106	3065	3006	2934	2850	2788	2728	2737	2747	2728	2715
1054076	Leck	7635	7701	7785	7761	7601	7527	7585	7628	7716	7666	7736	7813	7758	7680	7680	7623	7627	7662	7619	7550	7660	7546	7601	7505	7345	7295	7182	7123	7145	7091
1054077	Lexgaard	52	50	48	50	51	57	56	57	54	57	61	64	58	61	63	62	66	73	71	71	68	72	64	55	56	58	60	55	71	69
1054078	List	1493	1483	1484	1517	1531	1548	1561	1561	1560	2552	2438	2452	2462	2549	2623	2640	2665	2689	2693	2757	2823	2888	2886	2997	2884	2888	2856	2608	2479	2376
1054079	Löwenstedt	669	656	646	655	657	659	649	641	657	683	663	662	661	677	674	674	673	691	667	670	651	646	646	637	635	637	650	636	634	618
1054080	Lütjenholm	336	328	315	315	317	315	317	330	321	314	311	318	320	328	330	339	336	341	352	353	353	355	342	310	301	301	276	267	272	276
1054083	Midlum	427	435	443	470	442	426	409	401	401	369	377	383	378	363	358	361	346	347	335	324	326	339	338	347	337	331	327	337	336	332
1054084	Mildstedt	3925	3863	3801	3814	3796	3815	3810	3781	3804	3786	3813	3797	3723	3687	3678	3674	3636	3576	3410	3376	3323	3249	3059	2948	2861	2742	2664	2633	2578	2555
1054085	Nebel	905	930	935	924	935	920	934	932	960	931	937	955	982	932	953	963	976	1003	1031	1015	1053	1065	1051	1049	1069	1057	1025	1002	987	949
1054086	Neukirchen	1134	1135	1142	1137	1167	1181	1190	1234	1243	1282	1273	1293	1296	1289	1300	1327	1337	1311	1328	1335	1301	1308	1287	1238	1193	1212	1250	1286	1234	1189
1054087	Nieblum	569	569	582	563	561	553	567	587	606	626	629	610	639	611	621	628	650	672	695	695	670	662	661	674	698	699	699	711	716	689
1054088	Niebüll, Stadt	9992	9882	10006	9946	9905	9736	9715	9683	9574	9315	9252	9257	9183	9019	8942	8834	8607	8463	8279	8072	7966	7882	7692	7456	7382	7236	7213	7069	7015	6809
1054089	Norddorf	570	545	566	572	563	563	575	570	572	625	634	638	617	623	638	645	633	615	640	631	647	643	644	616	624	625	612	632	583	558
1054090	Norderfriedrichskoog	40	54	53	50	51	43	46	48	49	40	39	44	40	38	34	34	35	35	43	42	45	51	50	52	48	47	43	45	42	52
1054091	Nordstrand	2253	2241	2275	2223	2201	2197	2206	2243	2254	2218	2266	2273	2246	2234	2258	2269	2284	2279	2256	2253	2269	2290	2293	2337	2366	2384	2400	2423	2431	2416
1054092	Norstedt	410	412	401	385	388	388	407	415	432	421	425	430	432	423	423	421	426	436	442	442	435	426	431	425	414	398	407	397	398	407
1054093	Ockholm	306	296	301	318	325	318	319	332	341	356	356	358	358	373	372	374	371	388	389	397	401	390	396	385	375	375	378	395	393	395
1054094	Oevenum	473	459	439	428	432	458	454	457	458	463	475	486	481	496	481	501	515	512	505	526	515	528	508	486	454	452	453	446	453	449
1054095	Oldenswort	1250	1262	1261	1267	1262	1261	1232	1228	1269	1252	1270	1282	1291	1302	1301	1318	1309	1344	1309	1282	1267	1283	1292	1290	1269	1234	1228	1232	1236	1265
1054096	Oldersbek	739	733	730	691	683	678	655	642	662	654	652	647	656	666	656	657	637	648	651	655	651	612	581	580	558	535	522	510	488	485
1054097	Olderup	461	458	444	429	439	442	442	443	437	435	439	451	447	461	451	458	458	450	427	421	420	396	402	390	389	385	374	346	353	356
1054098	Oldsum	505	514	507	508	496	507	534	543	562	566	562	552	560	571	563	569	570	574	576	551	541	530	543	548	521	520	501	489	500	480
1054099	Ostenfeld (Husum)	1521	1519	1544	1533	1562	1536	1538	1536	1530	1530	1531	1553	1553	1549	1540	1526	1528	1544	1505	1457	1399	1408	1354	1318	1345	1247	1224	1236	1249	1249
1054100	Osterhever	204	210	225	216	210	224	226	234	249	238	234	246	244	245	251	255	252	255	261	260	264	268	255	268	259	270	273	274	279	292
1054101	Oster-Ohrstedt	632	617	605	612	602	606	607	618	624	650	646	654	635	667	657	670	671	646	643	620	634	619	611	582	572	550	554	555	569	580
1054103	Pellworm	1163	1142	1137	1136	1147	1158	1161	1177	1179	1080	1081	1089	1085	1124	1140	1143	1151	1150	1130	1165	1176	1154	1176	1137	1165	1159	1151	1119	1099	1112
1054104	Poppenbüll	229	232	222	229	234	239	234	230	238	191	185	197	203	209	203	200	204	215	212	216	219	226	224	233	236	247	233	235	244	239
1054105	Ramstedt	414	416	422	428	435	420	422	435	435	448	454	448	454	441	442	447	437	436	438	424	412	408	405	378	368	364	359	367	355	334
1054106	Rantrum	1880	1910	1859	1849	1815	1818	1775	1719	1653	1635	1623	1629	1647	1604	1612	1585	1560	1558	1543	1452	1418	1348	1357	1332	1314	1310	1296	1264	1278	1289
1054108	Reußenköge	324	320	316	323	335	325	335	338	356	332	324	333	332	343	354	366	367	362	360	354	341	333	336	339	342	368	356	372	377	364
1054109	Risum-Lindholm	3796	3798	3776	3765	3739	3693	3630	3627	3642	3638	3654	3635	3598	3617	3626	3612	3595	3609	3592	3543	3521	3429	3324	3309	3236	3156	3162	3167	3142	3160
1054110	Rodenäs	406	402	404	409	413	409	424	419	443	429	427	441	451	456	461	452	471	482	473	466	455	455	458	446	453	450	438	433	430	439
1054113	Sankt Peter-Ording	3997	3992	3960	4036	3968	3933	3742	3781	3799	4127	4111	4177	4174	4072	4053	4080	4060	4028	4058	4075	4159	4203	4202	4210	4198	4099	4072	4030	3962	3857
1054116	Schwabstedt	1354	1354	1320	1344	1321	1322	1320	1321	1320	1328	1298	1312	1331	1355	1346	1347	1354	1341	1322	1330	1296	1269	1265	1269	1242	1229	1227	1213	1226	1208
1054118	Schwesing	956	954	950	932	921	914	907	918	919	925	900	907	919	918	917	948	916	924	910	906	920	892	879	839	787	736	736	754	740	735
1054119	Seeth	765	763	767	775	1417	574	585	603	580	681	697	691	704	710	717	704	680	672	709	718	711	729	741	709	689	687	675	666	667	689
1054120	Simonsberg	824	831	823	824	801	803	780	791	785	809	825	862	843	865	859	863	864	863	876	863	882	857	841	843	796	790	759	758	775	780
1054121	Sönnebüll	282	291	291	291	277	278	279	277	270	270	265	252	252	242	233	225	233	228	227	230	223	224	220	218	211	195	183	179	179	179
1054123	Sollwitt	285	290	274	288	284	289	293	288	287	301	301	306	315	314	317	323	326	317	319	315	316	318	308	309	309	316	316	300	288	305
1054124	Sprakebüll	256	247	250	247	239	235	227	235	232	229	233	230	229	223	214	225	229	223	222	225	214	215	218	242	218	195	223	221	225	214
1054125	Stadum	959	961	984	982	991	993	993	1008	987	1025	1036	1022	1025	1046	1062	1079	1062	1066	1056	1059	1054	1050	1041	994	955	944	955	1007	1029	1054
1054126	Stedesand	858	879	882	885	884	903	883	850	848	873	856	857	866	857	865	871	873	828	821	844	840	827	792	779	760	748	748	752	740	766
1054128	Struckum	1032	1011	1005	978	973	969	953	969	990	968	984	1008	1017	1024	1004	993	982	1002	1005	993	954	944	922	881	844	835	825	835	818	828
1054129	Süderende	188	182	182	182	182	175	179	196	198	186	178	173	173	185	180	176	179	176	181	182	177	187	187	178	184	187	173	179	171	157
1054130	Süderhöft	13	14	22	22	19	20	20	20	19	23	23	20	19	19	21	18	19	21	18	20	18	19	21	27	26	21	20	19	19	21
1054131	Süderlügum	2417	2380	2356	2350	2300	2311	2319	2269	2289	2254	2246	2234	2244	2227	2256	2218	2196	2151	2104	2128	2082	2018	1972	2010	1991	1954	1904	1861	1833	1834
1054132	Südermarsch	144	141	144	157	162	163	167	158	169	161	150	151	148	148	148	139	152	148	155	159	150	149	149	129	124	135	136	135	133	129
1054134	Tating	958	990	998	975	948	940	920	932	929	963	990	990	983	988	984	1010	990	959	976	986	950	969	971	1002	990	997	1021	1027	1005	981
1054135	Tetenbüll	587	581	619	618	618	647	636	637	650	625	618	610	618	628	634	658	666	679	691	699	698	678	692	681	664	673	658	674	681	694
1054136	Tinningstedt	247	260	259	254	252	249	243	248	242	221	203	205	208	207	198	207	200	203	215	214	209	206	208	211	215	211	206	209	214	204
1054138	Tönning, Stadt	4984	4965	4986	4976	4895	4852	4887	4909	4900	4921	4886	4936	4975	5025	5032	5028	5026	5044	5038	5029	4998	4890	4844	4892	4870	4922	4902	4948	4984	4957
1054140	Tümlauer Koog	106	117	107	112	115	113	104	111	113	97	94	100	100	108	109	109	117	115	116	113	123	126	123	123	121	124	116	123	121	123
1054141	Uelvesbüll	300	304	297	285	289	280	286	284	281	257	270	261	281	278	272	274	274	258	265	263	261	265	275	291	285	282	278	296	298	296
1054142	Uphusum	359	371	376	370	380	385	387	376	374	395	402	408	410	403	396	410	409	400	396	398	392	384	368	371	359	358	373	375	372	367
1054143	Utersum	398	393	407	414	399	404	424	415	414	420	426	413	417	415	406	415	417	427	433	440	439	434	448	460	468	461	452	448	443	430
1054144	Viöl	2223	2224	2244	2224	2153	2151	2156	2096	2059	2001	1993	1965	1951	1922	1921	1908	1885	1816	1770	1742	1722	1698	1589	1451	1435	1378	1293	1225	1195	1183
1054145	Vollerwiek	219	209	211	202	186	201	197	196	195	221	228	224	227	217	230	217	218	225	219	222	213	207	196	200	207	210	208	205	196	196
1054146	Vollstedt	183	192	184	186	186	183	186	179	179	165	164	159	162	170	167	156	163	164	147	149	142	137	125	123	128	115	123	115	119	119
1054148	Welt	198	208	217	211	221	217	224	215	222	215	218	214	208	220	223	224	228	238	239	244	234	230	219	211	215	197	193	194	200	203
1054149	Wenningstedt (Sylt)	1582	1590	1442	1423	1439	1444	1421	1403	1402	1481	1496	1551	1548	1553	1568	1589	1608	1612	1588	1481	1506	1508	1513	1537	1563	1580	1558	1557	1554	1576
1054150	Westerhever	94	95	98	103	104	109	116	118	125	117	120	129	130	131	130	126	123	125	126	124	122	122	121	120	127	133	134	131	133	126
1054152	Wester-Ohrstedt	1035	1066	1036	1010	1033	1004	1022	1055	1057	1057	1039	1055	1071	1116	1108	1100	1081	1039	1016	994	979	1018	974	977	987	968	942	908	896	935
1054154	Westre	358	358	359	344	362	367	373	374	390	406	409	401	385	406	396	394	401	405	417	415	424	419	409	397	388	396	390	386	390	382
1054156	Winnert	719	709	718	739	716	710	706	711	731	750	756	765	750	754	767	757	768	748	766	759	745	721	706	702	679	686	672	655	637	634
1054157	Wisch	113	103	105	108	104	103	110	113	113	124	121	120	124	129	135	137	134	131	132	125	120	133	118	111	111	105	99	100	101	107
1054158	Witsum	48	46	49	46	46	38	40	41	46	41	49	51	46	44	47	42	42	43	41	44	47	47	54	59	54	52	57	53	58	55
1054159	Wittbek	768	773	770	763	749	774	792	800	808	807	809	810	817	806	797	784	786	811	789	782	776	750	747	761	740	745	716	728	716	724
1054160	Wittdün	788	804	813	807	780	758	738	739	750	714	717	688	670	683	665	649	678	712	716	687	697	705	730	744	722	718	713	678	675	661
1054161	Witzwort	1029	1032	1046	1044	1036	1026	1029	1023	1031	994	982	988	978	989	971	966	959	952	969	963	946	947	936	921	901	917	905	922	904	882
1054162	Wobbenbüll	426	436	439	439	436	435	457	461	462	485	487	477	471	484	475	462	464	462	473	465	463	455	446	442	437	432	429	438	435	434
1054163	Wrixum	608	619	643	645	645	642	650	661	661	694	693	684	681	663	659	676	668	666	659	640	626	608	589	576	542	526	531	510	502	501
1054164	Wyk auf Föhr, Stadt	4222	4218	4174	4159	4206	4230	4263	4242	4304	4421	4396	4415	4449	4445	4437	4401	4411	4393	4441	4388	4428	4470	4545	4543	4598	4608	4673	4651	4581	4433
1054165	Galmsbüll	615	599	599	583	605	625	638	641	647	664	658	651	668	677	679	672	668	659	678	653	660	664	658	660	652	642	639	664	650	660
1054166	Emmelsbüll-Horsbüll	883	867	876	897	887	912	930	943	959	954	964	984	982	1029	1060	1051	1070	1106	1089	1080	1078	1090	1089	1103	1110	1084	1091	1074	1063	1066
1054167	Enge-Sande	1114	1123	1090	1082	1118	1094	1104	1122	1117	1127	1127	1114	1137	1150	1151	1156	1137	1142	1139	1121	1103	1092	1058	1024	1010	1026	1050	1028	1042	1043
1054168	Sylt	13689	13595	13638	13613	13453	13409	13424	13508	13703	15169	15277	15325	15426	15419	15365	15234	15213	15110	14975	15063	15214	15263	15462	15478	15504	15569	15547	15423	15324	15120
1055001	Ahrensbök	8287	8290	8281	8334	8297	8248	8222	8329	8345	8443	8437	8464	8533	8629	8643	8619	8574	8505	8515	8369	8222	8114	7998	7923	7758	7623	7493	7364	7265	7192
1055002	Altenkrempe	1114	1115	1106	1106	1102	1102	1087	1069	1045	1130	1122	1131	1122	1103	1122	1136	1143	1141	1159	1133	1136	1142	1106	1066	1090	1083	1061	1045	1055	1053
1055004	Bad Schwartau, Stadt	20044	20036	19997	20096	19945	19817	19682	19522	19434	19714	19683	19619	19714	19794	19727	19728	19901	20095	20120	20098	20026	20211	20096	20061	19972	19922	20167	20162	20203	20224
1055006	Beschendorf	525	519	557	539	503	532	535	527	521	558	570	547	559	554	552	540	533	530	522	528	539	539	521	523	526	487	488	493	486	498
1055007	Bosau	3389	3413	3404	3416	3382	3365	3443	3457	3461	3458	3447	3492	3530	3549	3584	3579	3601	3591	3541	3496	3505	3461	3410	3367	3311	3218	3166	3069	3060	3003
1055010	Dahme	1224	1250	1244	1263	1278	1301	1280	1248	1228	1247	1228	1209	1200	1188	1170	1142	1152	1191	1198	1206	1220	1227	1258	1270	1298	1303	1205	1187	1188	1167
1055011	Damlos	615	603	592	622	646	648	646	667	672	706	714	726	701	699	693	657	625	625	631	642	640	630	618	568	537	526	518	514	495	516
1055012	Eutin, Stadt	17013	16971	16946	17041	16979	16781	16769	16636	16379	17047	17184	17298	17355	17334	17175	17093	17011	17039	16929	16874	16732	16897	17031	17055	17114	16938	17133	17010	16845	16784
1055014	Göhl	1118	1105	1112	1116	1133	1147	1147	1144	1160	1181	1198	1194	1188	1217	1208	1192	1203	1204	1174	1095	1103	1037	1016	1008	989	974	931	943	922	865
1055015	Gremersdorf	1507	1496	1485	1487	1475	1461	1472	1475	1459	1510	1501	1489	1498	1493	1483	1465	1482	1462	1467	1476	1492	1456	1452	1470	1452	1433	1432	1432	1418	1401
1055016	Grömitz	7158	7236	7240	7134	7150	6942	6913	6916	6906	7677	7749	7731	7753	7784	7760	7805	7773	7699	7584	7486	7481	7399	7423	7458	7354	7426	7309	7221	7095	6903
1055017	Großenbrode	2180	2186	2202	2220	2160	2138	2076	2066	2053	2117	2139	2192	2193	2213	2206	2187	2192	2194	2160	2111	2081	1961	1968	1953	1969	1950	1943	1913	1885	1852
1055018	Grube	1045	1040	1022	1019	985	982	991	1001	997	993	999	1002	1037	1034	1043	1003	993	979	1001	1030	1023	998	1010	1004	985	990	1009	999	964	956
1055020	Harmsdorf	651	653	645	653	654	667	677	670	679	693	714	724	731	721	738	713	736	737	738	740	735	734	733	735	762	740	723	715	706	695
1055021	Heiligenhafen, Stadt	9122	9211	9117	9162	9126	9139	9072	9084	9062	9221	9196	9275	9310	9227	9337	9299	9287	9266	9244	9221	9176	9176	9229	9193	9119	9103	9134	9040	8945	8938
1055022	Heringsdorf	1109	1120	1158	1139	1101	1091	1095	1109	1121	1029	1042	1066	1074	1087	1117	1117	1121	1139	1114	1087	1108	1106	1106	1074	1072	1050	1053	1039	1028	1018
1055023	Kabelhorst	430	435	449	427	434	418	430	422	442	435	444	437	459	451	447	454	471	461	443	424	432	433	414	388	426	425	421	421	429	421
1055024	Kasseedorf	1431	1438	1474	1452	1452	1467	1452	1470	1464	1548	1556	1561	1568	1552	1570	1606	1568	1555	1580	1547	1512	1472	1419	1427	1363	1360	1342	1327	1322	1290
1055025	Kellenhusen (Ostsee)	1125	1117	1106	1078	1037	1019	1037	1029	1039	1046	1051	1089	1126	1100	1055	1055	1055	1036	1035	1015	1028	1044	1053	1062	1072	1063	1052	1036	1028	1023
1055027	Lensahn	4938	4932	5011	4978	4967	4931	4960	5038	5087	4846	4933	5003	4945	5007	5056	5090	5090	5095	5037	4982	4889	4773	4684	4562	4513	4476	4412	4415	4346	4386
1055028	Malente	10864	10773	10607	10616	10493	10453	10410	10366	10489	10810	10848	10889	10836	10876	10823	10894	10763	10709	10722	10720	10709	10628	10621	10666	10596	10522	10379	10317	10128	10118
1055029	Manhagen	381	379	381	370	368	368	382	376	386	388	410	407	410	414	415	416	410	412	393	411	395	390	377	366	375	377	378	389	374	363
1055031	Neukirchen	1167	1175	1198	1187	1227	1209	1190	1183	1205	1174	1167	1157	1154	1172	1162	1160	1145	1150	1153	1133	1118	1112	1063	1048	1048	1065	1068	1046	1045	1029
1055032	Neustadt in Holstein, Stadt	15043	15093	15187	15211	15041	15012	14887	15030	15034	16266	16647	16535	16436	16471	16541	16366	16188	16201	15963	15915	15878	15939	15815	15776	15708	15786	15635	15244	14886	14779
1055033	Oldenburg in Holstein, Stadt	9794	9833	9806	9864	9771	9774	9766	9698	9699	9698	9689	9663	9702	9786	9850	9939	9939	9938	10017	10008	10039	10112	10026	10032	9984	9894	9933	9849	9738	9551
1055035	Ratekau	15148	15231	15285	15363	15283	15193	15132	15147	15183	15556	15599	15683	15743	15750	15821	15800	15775	15629	15429	15371	15213	14979	14784	14674	14618	14590	14599	14557	14441	14406
1055036	Riepsdorf	909	912	892	911	943	950	970	958	985	1014	1019	1044	1052	1016	1044	1061	1048	1042	1030	1032	1063	1012	1026	989	984	989	975	964	995	984
1055037	Schashagen	2129	2105	2137	2137	2142	2149	2169	2168	2169	2522	2552	2519	2522	2529	2537	2472	2405	2425	2427	2416	2366	2349	2331	2298	2267	2245	2197	2179	2175	2142
1055038	Schönwalde am Bungsberg	2604	2553	2533	2591	2569	2543	2530	2556	2628	2486	2448	2528	2523	2526	2551	2544	2546	2565	2534	2510	2520	2543	2505	2496	2463	2386	2351	2282	2231	2184
1055039	Sierksdorf	1583	1590	1618	1602	1596	1590	1530	1532	1529	1592	1623	1589	1578	1579	1566	1533	1489	1489	1480	1427	1453	1431	1503	1477	1499	1478	1461	1478	1424	1416
1055040	Stockelsdorf	16998	16926	17071	16995	16800	16554	16543	16498	16544	17113	16832	16641	16663	16506	16437	16511	16424	16286	16204	16277	16408	16271	16221	16147	16153	16082	15798	15526	15158	14940
1055041	Süsel	5048	5035	5052	5103	5108	5191	5273	5259	5332	5416	5407	5408	5422	5432	5399	5377	5340	5342	5279	5130	5012	4801	4737	4689	4622	4674	4608	4537	4590	4528
1055042	Timmendorfer Strand	8712	8742	8787	8802	8864	8792	8769	8825	8819	8976	8906	8937	8991	9034	8975	9004	9073	9019	8956	8935	8909	8869	8935	8869	8918	8939	8920	8787	8639	8439
1055043	Wangels	2145	2167	2159	2185	2188	2187	2172	2234	2204	2192	2199	2227	2300	2333	2352	2345	2373	2319	2316	2324	2285	2232	2218	2214	2233	2200	2234	2248	2191	2164
1055044	Scharbeutz	11351	11309	11187	11042	10908	10784	10716	10804	10758	11710	11723	11753	11779	11862	11987	11874	11929	11772	11635	11442	11418	11271	11161	11037	10940	10798	10686	10628	10576	10378
1055046	Fehmarn, Stadt	12638	12592	12536	12552	12467	12410	12410	12369	12442	12942	12972	12962	12981	12930	12894	12813	12782	12656	12656	12636	12534	12419	12361	12331	12288	12247	12107	11991	11901	11838
1056001	Appen	4847	4831	4775	4846	4854	4830	4871	4842	4837	5844	5939	5931	5899	5833	5811	5770	5669	5503	5466	5306	5191	5021	4967	4934	4914	4863	4851	4710	4364	4233
1056002	Barmstedt, Stadt	10356	10368	10331	10283	10184	10108	10068	9943	9836	9777	9741	9702	9691	9704	9535	9470	9477	9433	9400	9283	9203	9302	9268	9225	9297	9271	9251	9011	8723	8568
1056003	Bevern	576	572	585	605	591	605	605	602	607	575	603	600	589	587	584	583	574	571	551	546	541	542	520	494	487	461	457	453	453	452
1056004	Bilsen	812	834	805	805	762	752	735	760	754	723	740	727	730	722	718	695	705	690	679	665	662	656	654	651	649	687	669	718	741	730
1056005	Bönningstedt	4520	4493	4545	4547	4554	4466	4467	4447	4436	4405	4397	4350	4313	4141	4090	4066	3980	4059	4030	3933	3828	3763	3588	3491	3478	3461	3461	3437	3460	3444
1056006	Bokel	605	590	592	616	628	629	637	615	630	638	646	642	643	649	640	657	661	652	652	635	602	585	553	524	527	484	472	474	480	458
1056008	Bokholt-Hanredder	1253	1237	1279	1232	1242	1224	1202	1197	1221	1282	1276	1253	1289	1281	1268	1234	1219	1253	1243	1226	1205	1166	1193	1245	1248	1289	1268	1233	1209	1213
1056009	Borstel-Hohenraden	2524	2506	2487	2402	2317	2320	2322	2264	2264	2263	2263	2251	2231	2206	2180	2112	1975	1889	1903	1870	1866	1842	1819	1801	1761	1773	1766	1812	1822	1792
1056010	Brande-Hörnerkirchen	1636	1636	1617	1618	1618	1621	1618	1606	1597	1595	1617	1616	1639	1617	1628	1611	1594	1582	1570	1525	1458	1376	1250	1187	1160	1134	1108	1088	1082	1043
1056011	Bullenkuhlen	386	386	351	349	346	354	359	353	370	365	366	352	354	368	360	355	360	353	341	341	324	319	318	305	290	286	293	293	289	301
1056013	Ellerbek	4250	4230	4160	4131	4106	4118	4143	4153	4162	4204	4249	4244	4273	4274	4258	4231	4286	4246	4237	4179	4215	4264	4207	4160	4120	4142	4190	4223	4235	4209
1056014	Ellerhoop	1519	1526	1494	1434	1448	1455	1439	1437	1446	1435	1397	1361	1350	1327	1330	1344	1319	1334	1325	1302	1307	1300	1289	1265	1260	1265	1173	1169	1130	1079
1056015	Elmshorn, Stadt	49983	49883	49618	49206	48684	47907	47667	47490	47436	48924	48444	48183	48052	48279	48331	48379	48344	47985	47603	47391	47349	47252	47233	47160	46970	46560	45800	45183	44320	43689
1056016	Groß Nordende	800	798	815	806	776	778	774	734	714	699	711	709	710	718	701	693	693	701	667	644	666	600	542	477	473	465	458	443	405	389
1056017	Groß Offenseth-Aspern	432	422	421	414	419	413	403	408	405	451	431	444	428	437	437	419	401	378	384	377	365	360	353	338	337	323	308	287	283	276
1056018	Halstenbek	17944	17749	17700	17530	17250	17085	16736	16631	16482	16645	16552	16502	16406	16336	16312	16183	16123	16034	16014	15802	15697	15554	15531	15602	15583	15593	15701	15550	15405	15263
1056019	Haselau	1067	1063	1047	1052	1048	1061	1059	1065	1056	1096	1109	1122	1121	1159	1100	1104	1106	1087	1072	1077	1049	1064	1062	1048	1062	1004	1002	988	980	963
1056020	Haseldorf	1797	1785	1800	1774	1770	1756	1736	1712	1712	1677	1701	1710	1693	1712	1727	1701	1705	1668	1639	1626	1673	1686	1626	1589	1539	1521	1513	1474	1473	1464
1056021	Hasloh	3747	3715	3623	3550	3568	3479	3332	3312	3330	3397	3396	3374	3340	3364	3376	3421	3448	3436	3452	3399	3415	3379	3367	3288	3171	3140	3125	3125	3094	3141
1056022	Heede	743	735	731	742	743	697	691	678	694	698	688	697	721	717	725	704	691	688	688	665	666	665	634	637	609	612	618	612	617	615
1056023	Heidgraben	2697	2724	2675	2719	2634	2535	2528	2497	2492	2419	2390	2318	2281	2284	2267	2230	2214	2187	2170	2130	2080	2046	2011	1994	1945	1925	1940	1932	1900	1898
1056024	Heist	2873	2807	2824	2847	2849	2862	2828	2836	2808	2839	2821	2806	2794	2774	2733	2737	2688	2701	2630	2609	2453	2388	2346	2309	2306	2247	2220	2174	2144	2139
1056025	Helgoland	1306	1265	1246	1357	1400	1356	1356	1370	1372	1127	1172	1267	1299	1333	1388	1434	1445	1493	1499	1549	1561	1573	1624	1648	1643	1702	1731	1738	1747	1755
1056026	Hemdingen	1695	1680	1673	1671	1635	1639	1631	1635	1651	1624	1630	1653	1633	1622	1637	1643	1651	1603	1553	1518	1502	1466	1436	1431	1430	1427	1425	1376	1381	1355
1056027	Hetlingen	1365	1364	1343	1342	1331	1311	1308	1306	1311	1321	1332	1326	1343	1357	1332	1313	1297	1319	1372	1375	1267	1186	1146	1131	1134	1132	1122	1132	1138	1112
1056028	Holm	3234	3268	3255	3221	3188	3149	3112	3074	3080	3101	3104	3116	3106	3119	3083	3057	3050	3006	3043	2907	2834	2826	2833	2877	2761	2652	2598	2530	2470	2483
1056029	Klein Nordende	3337	3323	3280	3305	3295	3203	3136	3101	3036	3043	3018	2996	2995	2998	3032	2994	3042	3057	3010	2979	2911	2894	2820	2755	2698	2684	2633	2615	2585	2553
1056030	Klein Offenseth-Sparrieshoop	3106	3065	3024	2998	2996	2999	2934	2918	2868	2900	2849	2826	2777	2749	2726	2683	2615	2544	2501	2479	2409	2332	2204	2187	2162	2141	2133	2163	2141	2082
1056031	Kölln-Reisiek	3416	3316	3215	3228	3209	3115	3071	2972	2847	2810	2759	2722	2706	2637	2641	2545	2550	2559	2558	2558	2530	2506	2468	2419	2318	2320	2291	2203	2158	2125
1056032	Kummerfeld	2346	2366	2345	2281	2259	2215	2157	2134	2101	2055	2037	2088	2107	2124	2137	2074	1986	1960	1950	1920	1878	1854	1774	1796	1796	1800	1778	1730	1692	1634
1056033	Seester	1017	1024	980	974	982	957	938	908	905	949	953	944	968	972	981	977	964	955	942	939	939	918	927	891	873	865	901	871	830	836
1056034	Langeln	601	592	601	594	564	538	537	536	532	523	517	527	549	514	506	512	501	511	508	504	522	524	494	488	499	511	512	501	473	455
1056035	Lutzhorn	771	801	800	812	775	797	780	797	816	806	816	819	810	816	808	785	798	798	795	764	711	694	696	687	666	659	641	647	627	626
1056036	Moorrege	4445	4394	4392	4335	4193	4160	4022	3995	4082	4110	4077	4045	4033	4049	3993	4015	3993	3998	3913	3932	3950	3872	3835	3761	3732	3742	3727	3689	3655	3605
1056037	Neuendeich	507	535	536	524	533	527	524	518	529	528	532	532	520	514	510	520	527	517	504	496	491	447	449	445	441	442	446	429	433	428
1056038	Osterhorn	419	418	423	432	414	416	404	402	393	418	410	414	436	435	441	449	447	453	452	447	433	434	437	409	387	371	332	332	330	314
1056039	Pinneberg, Stadt	43667	43280	43155	42638	42266	42002	42055	41726	41270	42508	42314	42367	42301	41972	41461	41063	40244	39905	39502	39423	39300	39382	39286	39133	38903	38766	38518	38388	37918	37518
1056040	Prisdorf	2233	2244	2258	2327	2322	2260	2207	2162	2154	2237	2238	2183	2157	2184	2187	2218	2199	2117	2127	2099	2046	2060	2078	2048	2030	1889	1864	1848	1822	1797
1056041	Quickborn, Stadt	21331	21296	21056	20808	20608	20443	20042	19986	19843	20556	20556	20289	20136	20208	20276	20227	20277	20144	20075	19875	19789	19508	19440	19414	19250	19214	19080	18790	18633	18485
1056042	Raa-Besenbek	543	552	555	580	587	572	563	568	536	559	544	545	539	509	509	521	515	514	530	520	505	508	514	533	534	520	521	501	471	457
1056043	Rellingen	14372	14341	14391	14307	14089	13912	13691	13508	13484	13718	13673	13694	13746	13717	13709	13726	13700	13693	13574	13532	13447	13470	13501	13537	13658	13726	13707	13853	13706	13729
1056044	Schenefeld, Stadt	19332	19271	19141	19168	19152	18779	18672	18448	18332	18506	18408	18195	18444	17970	17891	17926	17882	17871	17863	17797	17684	17456	17097	16544	16041	15746	15661	15591	15387	15319
1056045	Seestermühe	899	883	885	896	918	912	944	959	959	893	919	902	915	938	930	923	912	914	907	849	854	843	849	850	837	824	828	802	807	793
1056046	Seeth-Ekholt	871	859	850	847	845	860	834	839	835	839	834	830	831	846	848	845	841	829	824	806	780	755	687	665	660	644	651	645	620	598
1056047	Tangstedt	2252	2216	2230	2247	2247	2243	2231	2196	2195	2245	2216	2197	2178	2132	2128	1992	1860	1892	1913	1897	1926	1912	1898	1881	1835	1823	1799	1799	1764	1702
1056048	Tornesch	14066	13779	13652	13319	12946	12814	12586	12560	12609	12980	12918	12995	13063	12970	12896	12957	12966	12853	12795	12644	12522	12419	12393	12266	12103	12011	11763	11180	10907	10613
1056049	Uetersen, Stadt	18567	18496	18429	18272	18101	17968	17662	17598	17571	17688	17630	17739	17852	17865	17866	17852	18013	18107	18083	18056	18012	18130	18101	18241	18155	18121	18161	17942	17772	17588
1056050	Wedel, Stadt	33708	33547	33347	33322	32890	32574	32289	31725	31403	32203	32221	32137	32033	32048	32028	32014	32164	32354	32221	32060	31783	31850	31976	31963	31719	31623	31414	31496	31033	30752
1056051	Westerhorn	1330	1326	1325	1340	1335	1311	1317	1303	1304	1283	1276	1276	1296	1315	1337	1308	1270	1247	1184	1153	1156	1160	1122	1130	1087	1076	1032	1015	1010	1008
1057001	Ascheberg (Holstein)	2895	2932	2998	2996	2989	3012	3044	3064	3107	3206	3224	3196	3195	3215	3188	3140	3147	3116	3070	2940	2825	2655	2604	2573	2566	2468	2476	2530	2501	2507
1057002	Barmissen	154	159	156	151	146	154	141	153	160	171	173	170	176	185	181	186	183	195	184	201	207	211	207	194	192	192	184	180	180	177
1057003	Barsbek	557	566	542	552	550	549	558	555	549	590	600	628	661	657	654	648	647	657	651	623	620	610	590	569	562	567	612	595	581	582
1057004	Behrensdorf (Ostsee)	632	619	613	617	615	620	608	605	605	641	648	653	640	623	610	609	589	575	589	595	568	549	569	580	588	592	576	559	560	567
1057005	Belau	383	365	366	388	385	380	366	361	367	344	354	350	344	331	335	336	333	335	318	318	315	333	353	361	350	341	362	362	379	386
1057006	Bendfeld	197	209	214	215	210	204	210	215	213	234	234	240	242	253	251	252	250	240	236	223	229	226	223	204	194	189	194	200	196	198
1057007	Blekendorf	1678	1704	1738	1792	1741	1694	1680	1721	1766	1773	1809	1813	1846	1811	1793	1841	1841	1823	1832	1853	1823	1804	1728	1699	1711	1685	1699	1699	1690	1662
1057008	Bönebüttel	2061	2041	2034	2079	2052	2045	2022	2021	2022	2055	2027	2008	2002	2017	2020	2056	2042	2035	1996	2026	1997	1929	1917	1865	1844	1753	1639	1622	1601	1549
1057009	Bösdorf	1288	1312	1347	1322	1298	1326	1323	1313	1329	1512	1531	1527	1579	1597	1612	1598	1627	1625	1630	1611	1599	1588	1571	1555	1611	1592	1519	1426	1393	1476
1057010	Boksee	439	454	453	457	447	449	439	451	448	467	477	484	498	487	486	479	480	496	497	476	468	460	468	453	443	434	443	427	407	408
1057011	Bothkamp	268	264	265	267	270	277	271	269	267	291	288	291	290	302	311	292	306	299	309	312	314	313	300	282	284	262	261	269	273	269
1057012	Brodersdorf	396	397	407	409	423	416	416	418	420	419	430	443	451	440	442	444	448	444	440	438	441	414	405	345	293	272	275	267	299	286
1057013	Dannau	610	619	609	612	616	623	642	650	651	661	656	682	682	697	688	688	685	688	671	657	619	581	577	557	537	510	484	468	441	424
1057015	Dersau	894	888	884	903	873	848	851	849	861	898	889	909	925	904	919	939	919	902	897	896	912	905	867	880	875	843	797	785	784	780
1057016	Dobersdorf	1052	1077	1077	1082	1100	1093	1097	1097	1094	1154	1129	1156	1197	1195	1201	1235	1261	1263	1271	1226	1187	1147	1132	1122	1083	1100	1108	1114	1112	1088
1057017	Dörnick	256	258	265	260	262	264	258	263	266	274	267	265	264	266	271	287	284	286	282	275	273	265	275	263	273	266	275	334	321	311
1057018	Fahren	129	128	130	130	128	130	129	128	139	159	144	145	141	144	152	154	151	145	138	147	155	152	128	124	126	126	131	124	124	122
1057020	Fiefbergen	545	547	562	574	573	574	560	566	567	574	594	585	614	611	598	586	597	596	574	564	569	572	549	537	522	430	407	402	397	383
1057021	Giekau	1040	1032	1026	1030	1056	1064	1059	1069	1078	1115	1118	1118	1131	1104	1137	1144	1122	1115	1074	1068	1063	1073	1077	1087	1039	1024	1023	1033	1003	1012
1057022	Grebin	979	954	948	929	907	911	921	911	927	938	979	1001	1016	989	1026	1034	1053	1052	1050	1048	1046	1059	1030	1038	1040	1022	1008	1031	1046	1038
1057023	Großbarkau	253	232	228	224	205	199	197	204	175	192	192	188	178	193	195	197	202	206	216	212	211	194	200	186	182	174	181	184	185	187
1057024	Großharrie	482	494	498	504	504	506	526	538	537	536	541	548	542	543	561	570	563	561	535	538	531	519	506	490	473	447	449	436	429	424
1057025	Heikendorf	8369	8183	8180	8177	8150	8141	8096	8155	8208	8225	8222	8248	8233	8278	8226	8155	8079	8103	8055	8033	8001	7996	7929	7902	7669	7657	7716	7710	7732	7806
1057026	Helmstorf	302	301	307	309	319	319	322	327	329	335	337	342	336	330	335	324	333	331	317	336	331	310	310	317	318	308	295	296	309	311
1057027	Högsdorf	399	402	398	412	410	398	417	421	420	416	428	438	419	424	430	437	444	430	431	427	414	398	393	394	380	366	367	365	375	377
1057028	Höhndorf	444	432	412	397	399	396	400	400	404	400	411	406	399	386	372	355	351	355	355	336	323	325	315	311	300	295	299	312	324	318
1057029	Hohenfelde	1017	1030	1044	1053	1045	1030	1022	1040	1040	1105	1091	1093	1070	1087	1046	1063	1090	1076	1040	1030	995	923	878	854	829	839	800	793	770	727
1057030	Hohwacht (Ostsee)	839	844	870	871	840	851	864	884	859	901	898	888	899	904	887	879	867	870	896	874	902	875	908	892	890	886	862	862	838	844
1057031	Honigsee	467	463	471	467	467	465	461	438	446	457	465	449	450	453	438	465	464	454	439	431	449	423	423	405	408	405	383	373	367	371
1057032	Kalübbe	580	574	583	583	563	561	571	584	571	560	557	563	573	586	594	592	594	608	610	609	599	562	556	574	543	499	488	491	484	481
1057033	Kirchbarkau	782	795	801	799	806	799	767	740	734	735	733	744	747	743	754	743	754	728	724	735	727	715	738	715	682	685	673	673	679	685
1057034	Kirchnüchel	190	180	183	188	184	187	190	183	171	179	176	179	182	191	189	191	189	199	192	200	200	197	203	201	197	203	212	213	222	225
1057035	Klamp	649	655	664	684	671	695	712	720	726	774	764	767	778	782	785	789	769	770	754	736	730	721	698	680	657	672	642	630	634	633
1057037	Klein Barkau	278	277	269	267	263	263	256	263	261	247	245	254	254	257	265	268	260	265	278	280	269	261	248	218	210	212	220	218	206	243
1057038	Kletkamp	86	86	84	87	85	93	100	102	111	128	137	129	138	133	141	143	143	131	135	133	140	138	152	132	141	138	149	137	148	141
1057039	Köhn	787	785	816	811	798	827	828	826	823	835	837	861	842	839	862	866	842	815	850	799	776	776	745	746	749	741	705	705	694	664
1057040	Krokau	404	411	412	427	417	439	423	440	449	483	483	475	472	473	465	474	460	435	446	436	400	341	331	325	323	324	319	323	315	310
1057041	Krummbek	397	395	420	428	414	409	418	409	413	386	388	387	390	371	353	343	326	332	324	331	318	306	320	318	337	309	297	309	305	304
1057042	Kühren	604	606	632	656	657	655	655	660	660	693	680	681	665	672	692	683	676	723	713	728	692	686	725	665	619	595	594	594	563	550
1057043	Laboe	4994	4976	4937	4934	4922	4899	4912	4906	4914	5214	5252	5207	5318	5247	5329	5316	5285	5255	5220	5177	5056	5056	5068	4966	4917	4905	4892	4812	4743	4698
1057044	Lammershagen	247	246	244	257	257	263	270	257	256	277	280	286	293	296	299	301	294	304	297	298	289	294	300	309	303	290	284	282	282	282
1057045	Lebrade	634	631	635	628	617	595	599	588	600	588	601	601	635	633	620	623	624	608	621	623	627	619	616	596	580	580	574	558	567	531
1057046	Lehmkuhlen	1318	1332	1314	1331	1335	1343	1349	1369	1372	1466	1453	1481	1468	1485	1507	1501	1475	1478	1489	1463	1464	1435	1404	1379	1358	1303	1290	1305	1290	1263
1057047	Löptin	295	296	291	287	294	295	294	303	311	323	310	316	301	310	295	299	301	311	314	310	304	300	297	283	274	258	257	256	245	256
1057048	Lütjenburg, Stadt	5269	5322	5347	5377	5739	5289	5341	5366	5422	5399	5397	5522	5547	5648	5684	5759	5763	5712	5696	5711	5696	5657	5592	5612	5658	5613	5664	5634	5543	5436
1057049	Lutterbek	354	356	366	369	368	364	362	374	374	369	370	377	385	390	395	393	393	386	381	376	390	345	335	295	290	298	302	315	305	296
1057050	Martensrade	984	982	972	982	958	958	985	958	968	989	984	994	1014	998	1003	992	1006	944	920	853	880	882	849	839	772	730	713	694	685	665
1057051	Mönkeberg	4112	4120	4141	4106	4111	3969	3961	3810	3790	3827	3825	3780	3782	3758	3686	3625	3449	3349	3248	3155	3196	3251	3244	3292	3300	3336	3327	3294	3309	3309
1057052	Mucheln	577	567	576	569	573	564	566	588	572	582	598	615	613	617	624	610	606	618	600	614	600	590	569	559	526	522	532	520	517	515
1057053	Nehmten	291	288	285	272	283	279	283	285	301	262	276	279	280	273	279	278	290	283	274	263	274	262	248	236	234	233	249	228	214	249
1057054	Nettelsee	424	430	431	433	443	421	426	424	429	404	413	414	408	389	397	401	396	398	414	399	386	398	355	345	335	333	338	338	348	354
1057055	Panker	1415	1426	1434	1418	1423	1436	1446	1431	1439	1561	1546	1565	1580	1579	1581	1581	1587	1573	1540	1515	1482	1453	1469	1378	1373	1311	1313	1224	1187	1175
1057056	Passade	337	330	331	345	356	351	347	350	345	326	303	301	281	284	298	293	293	286	284	240	252	256	257	248	247	238	236	227	215	214
1057057	Plön, Stadt	8926	8914	8933	8903	8806	8722	8647	8642	8655	12845	12856	12788	12824	12869	12919	12990	13036	13004	12933	13044	13178	13416	13270	13022	12725	12283	12519	12561	12383	11463
1057058	Pohnsdorf	407	420	432	450	444	439	442	453	461	484	487	473	488	477	488	489	499	481	483	486	453	443	445	431	444	427	414	436	424	422
1057059	Postfeld	440	433	442	446	472	460	457	465	458	459	463	466	470	481	475	464	492	482	460	469	453	452	444	415	422	394	395	390	396	404
1057060	Prasdorf	438	445	443	454	455	453	457	443	447	470	477	483	476	464	456	452	454	456	443	445	439	424	425	424	396	382	378	374	377	379
1057062	Preetz, Stadt	15952	15958	16041	16032	15895	15671	15526	15528	15445	15855	15860	15898	15895	15895	15827	15822	15695	15540	15540	15506	15383	15352	15302	15254	15173	15307	15266	15305	15206	15165
1057063	Probsteierhagen	2096	2098	2117	2078	2038	2002	2017	2017	2105	2078	2060	2036	2052	2028	2051	1958	1875	1851	1845	1858	1859	1830	1792	1822	1759	1728	1755	1749	1748	1763
1057065	Rantzau	336	345	339	347	338	333	335	329	337	329	335	331	328	320	328	328	321	330	338	333	320	317	330	313	318	307	306	297	290	289
1057066	Rastorf	803	799	812	832	839	857	852	846	847	866	859	857	844	865	870	858	870	861	848	830	845	839	826	831	828	819	824	816	807	807
1057067	Rathjensdorf	490	501	512	481	489	491	493	515	506	522	503	496	508	518	509	505	501	506	515	511	524	533	528	535	535	511	506	495	507	508
1057068	Rendswühren	772	767	766	752	753	770	784	777	798	808	805	806	810	813	788	795	810	790	777	785	745	750	737	716	711	719	693	689	677	670
1057069	Ruhwinkel	957	987	982	964	965	955	959	962	956	1039	1036	1061	1064	1051	1054	1057	1061	1053	1049	1052	1030	1027	1030	1024	963	937	912	895	886	887
1057070	Schellhorn	1481	1469	1493	1489	1511	1526	1536	1551	1530	1607	1583	1615	1614	1626	1633	1634	1670	1627	1558	1546	1536	1536	1498	1505	1470	1487	1519	1513	1498	1487
1057071	Schillsdorf	883	872	844	852	862	851	864	885	882	892	864	865	876	888	902	895	899	908	903	880	908	899	885	852	828	814	787	769	781	766
1057072	Schlesen	548	548	550	537	525	513	521	509	505	516	529	535	516	520	523	522	525	495	518	531	510	493	450	443	428	420	433	435	418	406
1057073	Schönberg (Holstein)	6337	6403	6376	6296	6208	6072	6042	6033	6052	6719	6766	6729	6651	6594	6540	6484	6490	6479	6425	6351	6273	6302	6200	6056	5842	6979	7034	7021	7145	6790
1057074	Schönkirchen	6714	6682	6601	6572	6548	6450	6300	6248	6243	6272	6253	6281	6337	6401	6440	6458	6388	6401	6528	6483	6414	6324	6263	6181	6075	5977	5976	5989	5911	5831
1057076	Schwartbuck	748	759	759	773	795	794	785	786	808	824	824	836	857	852	861	878	888	881	863	846	838	794	759	753	716	671	669	636	631	645
1057077	Selent	1575	1508	1460	1382	1361	1358	1316	1323	1344	1352	1294	1325	1353	1371	1340	1338	1294	1285	1286	1277	1249	1225	1218	1207	1247	1216	1224	1211	1211	1210
1057078	Stakendorf	478	477	465	453	469	465	466	459	460	461	462	458	441	446	442	446	455	449	445	453	437	454	448	447	429	435	421	420	413	430
1057079	Stein	761	777	773	761	773	784	783	786	816	808	828	827	858	851	869	858	872	885	865	872	844	796	750	702	719	713	702	726	762	736
1057080	Stolpe	1301	1293	1274	1293	1250	1253	1255	1253	1293	1316	1336	1320	1318	1338	1348	1336	1307	1292	1293	1280	1289	1225	1195	1173	1170	1126	1130	1152	1131	1087
1057081	Stoltenberg	330	325	326	315	313	306	294	292	310	319	320	330	345	332	335	346	360	339	320	307	312	322	322	331	334	325	325	319	309	318
1057082	Tröndel	377	387	396	390	389	380	375	394	392	411	418	416	419	413	406	410	423	414	418	403	393	391	388	370	358	356	358	348	362	363
1057083	Tasdorf	346	347	350	334	332	329	348	355	363	359	357	350	355	360	361	362	369	376	392	403	396	383	382	386	388	387	376	375	371	354
1057084	Wahlstorf	465	470	464	472	485	488	485	491	498	497	527	531	549	533	529	524	537	565	553	562	539	531	515	496	479	469	462	456	466	458
1057085	Wankendorf	2922	2948	2957	2954	2918	2934	2949	2907	2905	2831	2904	2970	2967	3004	2968	2939	2906	2898	2850	2800	2787	2747	2643	2553	2543	2494	2403	2387	2336	2329
1057086	Warnau	350	341	341	378	373	346	365	357	364	338	345	357	364	375	365	373	369	379	359	351	358	351	364	344	348	323	313	316	307	312
1057087	Wendtorf	972	968	951	982	989	988	997	1009	1027	1123	1112	1122	1128	1120	1141	1131	1147	1155	1152	1181	1176	1142	1102	1033	987	973	978	967	1043	974
1057088	Wisch	707	710	713	715	701	705	704	691	692	742	740	755	749	749	743	735	734	737	719	697	670	651	644	614	611	593	566	540	539	540
1057089	Wittmoldt	159	164	164	169	165	173	161	161	173	177	177	179	177	179	184	178	176	173	180	178	191	195	207	209	205	197	194	201	185	187
1057090	Fargau-Pratjau	820	837	832	822	751	736	759	768	763	770	791	786	802	802	803	817	825	835	811	812	800	813	799	759	739	687	660	622	621	627
1057091	Schwentinental	13762	13723	13724	13608	13575	13369	13408	13464	13511	13552	13638	13588	13621	13647	13695	13607	13657	13657	13638	13665	13677	13571	13285	13016	12994	12733	12552	12383	12411	12455
1058001	Achterwehr	1052	1030	1006	996	966	945	965	964	971	937	941	926	905	901	887	926	917	903	897	882	839	837	867	850	838	823	821	802	808	801
1058003	Alt Duvenstedt	1893	1902	1919	1922	1888	1891	1877	1907	1854	1870	1894	1868	1859	1868	1879	1872	1851	1827	1856	1811	1754	1767	1713	1632	1607	1540	1529	1480	1442	1433
1058004	Altenhof	304	300	306	309	312	293	306	303	301	315	297	308	301	313	308	294	300	296	280	294	285	284	296	308	302	281	273	274	266	260
1058005	Altenholz	9998	9986	9935	9896	9901	9872	9928	9880	9835	10004	9969	9889	9872	9745	9667	9720	9801	9866	9949	10081	10148	10135	10135	9805	9493	9312	9337	9372	9335	9428
1058007	Arpsdorf	276	272	284	287	274	268	269	270	274	257	257	254	248	264	268	261	247	249	248	239	248	249	240	228	229	232	220	235	234	236
1058008	Ascheffel	974	988	978	1027	1012	1014	986	1011	1005	964	978	986	987	963	955	941	989	1013	1004	1001	988	966	920	883	838	833	815	777	746	749
1058009	Aukrug	3861	3803	3811	3778	3770	3749	3754	3764	3744	3638	3655	3724	3733	3766	3812	3825	3834	3822	3814	3797	3752	3729	3630	3583	3481	3355	3303	3191	3149	3139
1058010	Bargstall	151	144	139	140	141	136	133	141	142	151	155	166	161	164	166	173	172	160	164	156	151	150	141	133	130	132	131	134	135	127
1058011	Bargstedt	718	713	711	717	708	701	712	708	717	752	745	766	764	761	773	784	786	795	776	763	751	719	731	693	702	704	709	696	698	686
1058012	Barkelsby	1539	1522	1515	1502	1501	1492	1462	1470	1455	1429	1443	1478	1493	1474	1512	1553	1569	1574	1585	1595	1593	1569	1521	1527	1505	1505	1486	1478	1487	1484
1058013	Beldorf	269	291	290	281	254	271	270	278	291	295	295	298	286	288	299	293	293	302	308	316	318	316	329	340	337	330	339	340	338	334
1058014	Bendorf	425	434	442	443	451	441	449	454	462	453	458	459	476	471	478	468	499	492	492	490	492	484	486	470	472	476	459	450	440	444
1058015	Beringstedt	735	734	730	747	727	738	743	740	720	726	722	750	746	763	772	752	752	755	751	766	771	763	770	761	753	747	751	715	698	671
1058016	Bissee	165	163	165	161	169	164	160	176	176	172	172	163	166	175	167	175	180	175	172	167	179	186	191	198	193	189	189	184	184	188
1058018	Blumenthal	699	693	710	709	700	683	683	688	700	669	669	673	667	675	679	674	686	701	709	702	705	697	717	724	709	653	631	612	595	606
1058019	Böhnhusen	292	299	296	292	291	311	319	306	313	331	336	337	342	340	343	351	349	346	344	349	326	342	343	350	336	327	333	335	325	323
1058021	Bokel	588	583	588	599	619	636	643	644	669	664	660	669	665	663	685	685	667	659	665	660	659	664	672	668	662	634	636	627	614	633
1058022	Bordesholm	7682	7749	7646	7512	7454	7489	7441	7426	7494	7360	7462	7504	7487	7587	7564	7629	7647	7585	7606	7543	7561	7498	7360	7171	7059	6932	6848	6824	6730	6755
1058023	Borgdorf-Seedorf	477	447	417	411	399	401	414	408	397	412	409	422	412	420	427	420	412	414	408	422	419	381	368	347	328	330	310	316	298	290
1058024	Borgstedt	1604	1548	1565	1585	1525	1493	1436	1404	1346	1317	1341	1373	1393	1404	1439	1429	1422	1398	1295	1284	1263	1256	1257	1192	1186	1183	1166	1144	1123	1130
1058025	Bornholt	167	170	170	164	160	156	164	172	173	187	187	185	203	209	223	220	218	212	231	235	239	221	203	200	182	198	188	198	192	183
1058026	Bovenau	1102	1094	1094	1114	1095	1082	1071	1103	1101	1067	1053	1054	1066	1059	1062	1064	1046	1068	1040	1040	1029	996	932	939	893	902	871	870	858	827
1058027	Brammer	344	353	361	386	390	374	389	398	397	392	399	401	425	418	420	421	417	381	357	338	346	343	333	330	323	331	333	343	342	345
1058028	Bredenbek	1515	1520	1525	1523	1500	1473	1447	1412	1390	1371	1378	1347	1337	1308	1316	1334	1316	1313	1292	1214	1198	1151	1051	1006	962	946	934	954	962	947
1058029	Breiholz	1379	1382	1356	1343	1373	1347	1368	1375	1399	1402	1426	1478	1511	1529	1510	1515	1535	1535	1526	1539	1512	1491	1479	1439	1384	1377	1336	1292	1259	1233
1058030	Brekendorf	1000	991	1000	993	974	995	993	968	996	1028	1047	1038	1064	1043	1048	1050	1070	1073	1012	996	988	1006	974	967	959	927	901	829	787	757
1058031	Brinjahe	111	112	115	123	124	120	123	123	126	128	125	128	134	132	131	136	133	133	133	141	149	147	137	142	141	148	154	139	126	128
1058032	Brodersby	666	650	663	671	701	678	688	689	703	756	762	764	763	751	749	749	741	755	751	727	737	704	697	707	691	660	691	688	660	659
1058033	Brügge	1053	1020	993	1007	1025	1025	1016	995	1024	1024	1049	1072	1079	1057	1041	1033	996	973	933	924	932	896	879	874	873	870	871	856	835	827
1058034	Büdelsdorf	10466	10297	10287	10230	10110	9991	9992	9961	10031	10080	10137	10207	10162	10244	10252	10242	10155	10166	10286	10276	10305	10404	10487	10515	10459	10503	10416	10462	10401	10359
1058035	Bünsdorf	606	620	617	612	624	619	608	624	640	617	608	601	580	608	601	595	579	567	576	558	537	524	529	522	508	498	512	510	496	490
1058036	Christiansholm	229	230	226	216	233	229	229	238	229	234	228	245	262	268	280	285	276	257	252	260	239	247	244	241	258	256	253	248	230	234
1058037	Dänischenhagen	3881	3858	3924	3934	3908	3903	3937	3915	3942	3656	3662	3647	3572	3514	3440	3393	3425	3448	3429	3421	3348	3200	2954	2900	2950	2941	2951	2945	2875	2788
1058038	Dätgen	574	565	632	568	573	551	535	538	536	565	558	572	599	587	571	569	575	578	552	542	552	521	535	492	496	467	458	455	445	435
1058039	Damendorf	428	420	431	430	445	427	431	429	417	433	441	434	450	444	453	454	447	438	422	436	427	420	408	386	383	385	374	378	383	363
1058040	Damp	1483	1424	1419	1479	1458	1412	1399	1426	1455	1555	1566	1551	1577	1595	1577	1618	1678	1615	1650	1599	1623	1649	1606	1640	1617	1598	1645	1595	1582	1569
1058042	Dörphof	745	733	708	734	729	704	690	695	705	741	732	738	731	744	768	747	749	741	734	744	741	750	729	698	713	705	709	692	697	704
1058043	Eckernförde, Stadt	21728	21902	21979	21942	21859	21784	21792	21791	21836	22614	22755	22798	22915	23008	23144	23249	23316	23250	23297	23304	23138	22920	22920	22898	23008	22847	22778	22772	22536	22426
1058044	Ehndorf	605	616	629	625	640	649	651	646	663	643	623	626	621	616	614	605	600	573	561	561	544	542	507	469	431	416	430	417	417	404
1058045	Eisendorf	282	278	280	279	303	297	294	292	291	311	313	307	317	310	309	305	302	310	317	313	287	289	283	276	256	233	215	212	208	201
1058046	Ellerdorf	486	490	496	511	490	503	493	503	512	510	528	535	553	546	556	562	564	551	552	536	530	513	517	492	447	429	422	406	408	404
1058047	Elsdorf-Westermühlen	1579	1602	1599	1613	1625	1628	1628	1653	1677	1673	1665	1678	1709	1688	1683	1721	1728	1690	1709	1707	1681	1685	1651	1568	1535	1439	1379	1349	1336	1290
1058048	Embühren	190	206	203	211	221	230	229	234	231	233	230	228	216	229	223	216	226	221	226	217	214	212	223	231	219	216	213	206	205	201
1058049	Emkendorf	1350	1342	1356	1351	1370	1399	1385	1405	1416	1402	1444	1444	1447	1467	1499	1540	1534	1520	1553	1580	1569	1504	1470	1427	1383	1384	1349	1329	1327	1308
1058050	Felde	2121	2139	2152	2143	2110	2081	2059	2049	2072	2097	2076	2064	2053	2072	2084	2093	2120	2081	2006	1939	1913	1891	1845	1844	1818	1793	1797	1741	1679	1707
1058051	Felm	1179	1197	1196	1195	1182	1167	1158	1096	1105	1087	1092	1124	1122	1103	1099	1124	1134	1124	1123	1106	1109	1106	1083	1074	1035	1017	997	936	933	920
1058052	Fleckeby	2168	2178	2165	2159	2148	2157	2102	2095	2108	1866	1859	1825	1827	1830	1808	1798	1733	1715	1675	1635	1641	1616	1614	1564	1459	1462	1462	1486	1464	1440
1058053	Flintbek	7265	7231	7250	7341	7305	7300	7328	7312	7372	7313	7346	7210	7154	7176	7161	7251	7328	7381	7339	7273	7181	6954	6826	6579	6577	6642	6763	6728	6694	6717
1058054	Fockbek	6369	6236	6207	6244	6193	6160	6170	6305	6300	6234	6261	6332	6334	6270	6303	6358	6332	6284	6295	6269	6179	6138	6078	6036	5980	5838	5752	5630	5520	5361
1058055	Friedrichsgraben	47	47	43	43	46	49	47	58	61	64	62	59	66	64	65	63	66	65	60	62	53	53	50	47	51	44	43	49	53	52
1058056	Friedrichsholm	420	427	416	407	405	399	388	413	425	403	419	413	425	438	452	459	465	457	443	447	450	446	432	431	427	396	392	377	381	382
1058057	Gammelby	523	535	520	516	524	514	527	521	544	556	544	525	526	516	539	523	542	530	526	549	527	535	488	468	456	454	433	456	450	466
1058058	Gettorf	7563	7528	7427	7448	7375	7242	7133	7001	6994	6759	6756	6758	6740	6702	6603	6466	6292	6284	6183	6004	5867	5794	5682	5566	5582	5556	5463	5515	5469	5443
1058059	Gnutz	1175	1187	1210	1166	1192	1198	1198	1188	1197	1184	1181	1177	1190	1194	1215	1199	1183	1202	1182	1154	1118	1080	1063	1039	1000	1004	998	983	969	959
1058061	Gokels	545	545	561	550	580	585	574	580	600	624	600	596	610	600	601	600	598	604	617	610	610	603	597	581	595	578	551	572	547	532
1058062	Grauel	250	275	269	257	250	256	258	259	252	249	251	261	264	256	267	258	244	238	238	240	241	237	229	223	221	222	215	216	208	209
1058063	Grevenkrug	215	200	209	226	224	232	219	219	225	231	250	237	253	271	276	293	299	293	296	288	293	299	317	288	268	260	254	257	248	243
1058064	Groß Buchwald	342	345	347	342	338	339	344	354	354	361	366	370	381	387	389	364	355	349	362	361	361	358	356	369	357	362	341	350	337	318
1058065	Groß Vollstedt	978	998	989	975	966	958	951	948	960	954	967	969	990	1004	1011	1009	990	990	982	976	951	925	923	859	778	737	723	699	707	710
1058066	Groß Wittensee	1289	1196	1206	1206	1183	1182	1157	1174	1150	1160	1137	1132	1132	1152	1114	1062	1016	1025	1034	1022	1012	985	1005	1014	1026	1029	1019	983	973	962
1058067	Güby	732	738	711	681	689	706	700	714	725	842	864	882	897	877	859	862	870	879	853	880	929	942	965	954	928	910	923	877	853	828
1058068	Haale	511	504	518	521	513	534	525	528	533	495	488	476	480	498	517	520	519	524	526	523	515	541	528	520	510	498	488	485	487	488
1058069	Haby	564	570	561	547	565	531	522	518	535	565	570	584	571	588	600	605	613	618	598	590	552	541	540	538	514	461	466	417	392	360
1058070	Hamdorf	1275	1279	1299	1293	1285	1273	1252	1275	1253	1283	1292	1287	1294	1281	1284	1313	1321	1326	1311	1279	1295	1270	1248	1251	1224	1222	1200	1208	1186	1203
1058071	Hamweddel	442	450	440	450	454	460	470	478	472	483	485	498	487	485	498	504	493	485	497	466	479	450	431	426	408	409	415	404	410	413
1058072	Hanerau-Hademarschen	2951	2965	3019	3034	2990	2973	2998	2990	3036	3022	3017	3059	3107	3080	3119	3095	3103	3133	3136	3154	3159	3114	3082	3105	3101	3060	3090	3087	3059	3053
1058073	Haßmoor	268	260	257	268	262	270	261	267	274	292	282	292	295	292	289	288	287	286	293	298	298	286	275	271	268	278	272	261	263	255
1058074	Heinkenborstel	137	130	139	145	144	134	137	139	137	136	152	157	154	155	152	149	158	163	162	164	167	167	172	173	165	169	175	174	180	180
1058075	Hörsten	54	54	50	54	51	47	51	53	54	60	61	67	90	83	98	125	98	128	114	122	124	126	119	93	97	94	99	94	82	57
1058076	Hoffeld	161	159	158	158	159	161	152	154	149	165	166	170	169	175	166	170	165	168	168	173	164	159	148	155	148	139	148	143	139	135
1058077	Hohenwestedt	5357	5305	5262	5312	5229	5152	5102	5077	5047	4908	4962	4935	4953	4937	5013	4990	4994	4897	4845	4842	4840	4938	5012	4954	4859	4690	4574	4525	4516	4451
1058078	Hohn	2408	2467	2487	2424	2413	2388	2388	2394	2440	2349	2328	2354	2343	2381	2387	2357	2302	2278	2196	2204	2226	2177	2116	2073	1981	2011	1985	1949	1943	1935
1058080	Holtsee	1304	1286	1250	1239	1220	1225	1218	1239	1261	1366	1368	1359	1366	1363	1375	1352	1354	1379	1376	1349	1348	1367	1334	1295	1261	1223	1189	1195	1187	1139
1058081	Holzbunge	343	341	350	327	330	336	326	339	342	339	327	321	352	357	377	373	366	367	362	357	355	345	341	347	351	341	329	321	314	307
1058082	Holzdorf	838	826	825	842	864	839	847	860	869	913	893	919	939	920	946	944	959	953	949	968	920	898	925	902	907	895	905	901	881	881
1058083	Hütten	213	211	210	203	210	200	192	195	205	209	207	195	198	204	208	207	201	197	206	208	204	190	188	183	184	181	188	187	177	177
1058084	Hummelfeld	280	279	281	282	296	287	282	292	287	286	290	283	288	290	279	276	271	284	286	289	277	285	271	269	268	258	260	246	252	243
1058085	Jahrsdorf	217	215	228	225	236	231	245	241	267	265	278	266	264	247	244	241	235	237	228	227	223	220	221	213	226	233	236	233	233	225
1058086	Jevenstedt	3318	3363	3392	3340	3262	3237	3247	3264	3245	3280	3288	3296	3339	3313	3304	3326	3333	3334	3277	3284	3209	3129	3100	3081	2951	2891	2792	2762	2740	2740
1058087	Karby	553	560	569	578	569	578	589	591	592	527	562	563	563	560	563	569	571	584	596	609	613	630	625	614	604	590	603	614	648	629
1058088	Klein Wittensee	215	194	184	173	201	197	204	202	196	198	192	192	197	209	215	212	215	209	204	208	204	200	206	208	216	200	203	212	216	200
1058089	Königshügel	176	168	162	161	166	160	162	159	161	164	168	160	162	167	175	173	168	181	174	163	155	144	162	159	145	148	142	145	142	132
1058090	Kosel	1391	1370	1365	1378	1395	1378	1397	1408	1414	1325	1327	1336	1375	1371	1372	1344	1350	1355	1326	1340	1341	1334	1289	1263	1266	1288	1262	1260	1238	1188
1058091	Krogaspe	438	432	423	436	431	432	425	429	443	447	472	479	475	485	474	494	484	493	487	469	440	430	404	403	404	400	396	410	411	398
1058092	Kronshagen	11993	11869	11791	11779	11807	11731	11715	11684	11785	12128	12080	11981	11922	11776	11855	11864	11916	11977	12074	12038	12259	12295	12299	12172	12227	12389	12458	12459	12387	12138
1058093	Krummwisch	681	700	691	708	713	693	687	671	673	695	714	718	737	746	764	754	741	746	730	726	730	699	685	645	643	622	600	598	591	576
1058094	Langwedel	1575	1545	1544	1517	1510	1496	1503	1499	1502	1403	1418	1437	1420	1408	1389	1368	1343	1314	1287	1303	1277	1301	1272	1224	1165	1176	1172	1167	1126	1119
1058096	Lindau	1353	1340	1341	1319	1284	1254	1234	1263	1258	1264	1301	1326	1345	1354	1341	1365	1360	1342	1340	1317	1328	1299	1265	1230	1251	1250	1222	1218	1184	1195
1058097	Lohe-Föhrden	470	469	469	475	474	484	484	493	500	629	615	638	627	632	653	650	645	670	675	669	671	705	699	712	651	632	703	720	744	758
1058098	Loop	198	191	194	184	182	183	178	181	179	174	178	172	179	185	184	185	194	191	195	189	201	202	199	205	198	195	198	196	179	169
1058099	Loose	815	815	827	828	829	801	761	751	751	792	798	781	785	824	834	848	853	865	851	848	842	844	812	815	850	843	812	788	756	758
1058100	Lütjenwestedt	543	561	565	563	554	553	555	574	576	595	594	592	616	636	634	643	637	642	629	631	629	609	622	621	615	598	590	576	586	574
1058101	Luhnstedt	394	395	392	388	396	397	395	415	428	429	426	419	437	444	452	438	434	438	444	434	450	432	436	438	427	382	382	379	372	349
1058102	Goosefeld	738	734	731	729	730	719	745	734	749	773	794	786	759	766	759	772	779	764	754	741	749	745	726	676	663	653	655	675	663	648
1058103	Meezen	363	353	360	370	375	366	361	360	360	378	375	388	400	397	406	404	396	403	405	402	373	371	358	367	342	340	320	320	314	307
1058104	Melsdorf	1852	1854	1852	1832	1778	1728	1688	1690	1723	1744	1754	1746	1752	1767	1764	1749	1742	1709	1659	1671	1645	1625	1603	1548	1427	1323	1257	1264	1252	1272
1058105	Mielkendorf	1363	1365	1390	1393	1373	1358	1361	1372	1363	1348	1343	1369	1361	1382	1384	1401	1402	1390	1392	1279	1231	1187	1205	1219	1206	1190	1214	1206	1151	1109
1058106	Mörel	229	234	232	235	249	241	246	244	248	252	248	253	252	262	259	249	267	267	259	252	245	248	235	230	218	211	208	209	186	172
1058107	Molfsee	5050	4956	5011	4977	4884	4840	4808	4794	4764	4754	4751	4770	4856	4895	4931	4979	4988	5007	5066	5047	5085	5106	5180	5222	5175	5171	5208	5227	5159	5159
1058108	Mühbrook	563	562	557	549	531	519	550	539	536	522	530	544	531	517	500	519	500	485	492	490	504	507	486	480	487	490	477	466	455	440
1058109	Negenharrie	360	358	362	365	378	374	340	349	353	354	351	352	352	355	347	340	353	346	343	341	350	331	343	344	325	329	330	324	327	326
1058110	Neudorf-Bornstein	1073	1072	1090	1075	1076	1077	1060	1049	1047	1088	1070	1052	1049	1050	1050	1091	1048	1054	1054	1016	1005	984	992	991	975	950	939	946	916	915
1058111	Neu Duvenstedt	133	129	128	125	124	114	107	109	120	136	141	148	153	148	147	149	146	141	138	140	135	128	125	120	119	119	121	121	120	123
1058112	Neuwittenbek	1125	1125	1155	1153	1178	1197	1192	1207	1184	1227	1247	1222	1251	1260	1267	1276	1277	1291	1285	1299	1308	1267	1209	1215	1211	1200	1189	1198	1215	1188
1058113	Nienborstel	599	596	587	583	590	580	586	594	593	601	606	617	622	618	625	636	632	641	637	644	611	591	612	588	571	586	580	579	568	557
1058115	Nindorf	595	610	592	591	605	624	618	628	621	672	674	677	712	697	694	686	683	685	672	652	628	589	570	583	537	535	525	537	544	537
1058116	Noer	870	848	840	850	837	843	839	850	858	820	824	847	865	885	885	890	892	882	872	839	817	821	829	811	790	795	801	757	756	766
1058117	Nortorf, Stadt	6866	6804	6710	6701	6650	6629	6660	6606	6626	6210	6245	6293	6352	6424	6424	6396	6423	6450	6506	6454	6433	6575	6583	6544	6567	6523	6468	6524	6522	6530
1058118	Nübbel	1594	1538	1506	1518	1525	1528	1546	1538	1557	1591	1601	1643	1658	1662	1656	1649	1657	1658	1641	1640	1630	1628	1569	1478	1455	1424	1364	1332	1317	1276
1058119	Oldenbüttel	245	252	261	253	284	275	272	280	284	291	290	283	284	271	265	275	292	261	268	278	283	289	302	278	265	259	250	258	244	250
1058120	Oldenhütten	156	158	161	161	159	161	159	153	152	158	162	155	151	155	155	151	142	142	138	138	129	124	106	107	111	115	114	124	116	113
1058121	Osdorf	2530	2462	2371	2356	2349	2335	2381	2382	2369	2396	2366	2375	2346	2339	2351	2360	2355	2304	2257	2231	2077	2091	2058	2034	1997	1962	1926	1879	1887	1878
1058122	Ostenfeld (Rendsburg)	588	593	578	587	569	575	543	545	549	535	528	545	552	542	549	572	596	568	563	583	549	518	481	482	481	455	455	435	441	432
1058123	Osterby	1001	989	982	976	944	946	945	930	924	922	946	959	971	954	943	923	935	967	983	965	963	977	959	931	910	919	918	882	861	838
1058124	Osterrönfeld	5075	5099	5136	5150	5110	5113	5096	5093	5150	5162	5208	5228	5251	5244	5226	5216	5077	4943	4780	4647	4456	4228	4017	3929	3830	3765	3703	3624	3609	3603
1058125	Osterstedt	681	665	653	663	682	665	650	637	643	644	650	635	655	663	676	678	678	688	694	700	680	682	686	645	639	616	598	598	564	550
1058126	Ottendorf	954	921	855	891	896	885	884	877	866	847	821	827	844	857	829	849	831	826	798	749	760	745	774	728	743	751	752	751	751	740
1058127	Owschlag	3715	3656	3653	3727	3671	3641	3650	3608	3624	3616	3677	3677	3667	3616	3608	3634	3578	3553	3506	3408	3320	3231	3199	3158	3167	3096	3017	3003	2894	2851
1058128	Padenstedt	1705	1719	1720	1702	1662	1649	1641	1582	1558	1482	1470	1442	1457	1438	1394	1337	1279	1233	1153	1063	952	826	801	808	799	762	770	742	760	767
1058129	Prinzenmoor	160	168	174	170	179	189	192	192	195	188	180	181	178	177	177	174	182	179	179	171	181	175	164	175	185	177	171	163	152	150
1058130	Quarnbek	1759	1746	1746	1763	1753	1739	1737	1767	1757	1826	1815	1806	1794	1785	1782	1767	1794	1790	1754	1772	1786	1748	1734	1692	1688	1663	1610	1593	1580	1606
1058131	Rade b. Hohenwestedt	95	87	89	84	89	78	81	88	86	89	90	93	95	90	91	83	79	76	79	77	71	81	81	74	71	70	70	77	79	69
1058132	Rade b. Rendsburg	192	203	194	196	208	213	207	216	219	226	228	229	231	242	245	229	228	250	235	249	243	241	248	250	248	251	260	272	267	280
1058133	Reesdorf	163	163	158	156	149	156	152	146	149	149	148	139	141	144	151	152	153	153	151	150	144	143	153	142	145	129	128	110	112	116
1058134	Remmels	439	460	426	439	435	425	425	432	432	430	425	430	434	419	408	423	419	406	419	414	426	427	421	421	434	434	413	442	448	431
1058135	Rendsburg, Stadt	28896	28470	28789	28190	27617	27266	27325	27446	27519	28217	28192	28350	28391	28476	28488	28435	28700	29101	29251	29321	29560	30002	30337	30778	30974	31162	31376	31473	31123	31170
1058136	Rickert	1027	1027	1053	1052	1068	1065	1073	1087	1099	1082	1089	1099	1111	1118	1115	1082	1080	1066	1051	1042	979	954	946	912	906	888	871	867	869	882
1058137	Rieseby	2710	2696	2691	2718	2671	2657	2656	2667	2625	2436	2456	2495	2571	2570	2565	2563	2554	2547	2554	2522	2502	2482	2434	2321	2138	2083	2032	1962	1948	1909
1058138	Rodenbek	482	471	480	483	480	495	479	491	490	491	492	495	497	500	499	500	497	497	487	478	488	478	507	501	482	474	475	467	466	469
1058139	Rumohr	853	826	832	815	824	831	817	800	808	742	750	764	744	730	716	736	736	736	760	769	755	732	720	709	734	712	701	683	683	678
1058140	Schacht-Audorf	4790	4786	4776	4694	4742	4655	4565	4521	4487	4453	4458	4479	4527	4518	4549	4521	4563	4460	4373	4257	4237	4211	4247	4264	4309	4193	4205	4203	4123	4116
1058141	Schierensee	366	362	373	364	371	379	385	388	403	381	384	388	393	384	377	389	388	392	400	414	399	403	406	416	435	425	425	387	388	396
1058142	Schinkel	1001	1015	1037	1036	1010	1005	1009	1006	1014	1025	1028	1034	1048	1029	1038	1024	1005	1015	1006	1015	1034	1013	1022	1017	980	945	937	920	878	867
1058143	Schmalstede	306	281	275	287	276	277	272	263	262	268	262	266	267	276	259	250	247	249	253	246	243	225	226	220	222	231	224	213	207	214
1058144	Schönbek	205	215	209	220	209	200	192	199	186	167	172	174	174	168	168	165	169	165	165	172	173	175	169	165	174	174	174	167	179	177
1058145	Schönhorst	296	300	306	321	314	318	315	319	333	311	314	313	311	316	305	316	317	328	315	315	322	330	337	329	336	323	324	321	324	326
1058146	Schülldorf	747	766	769	780	767	731	706	704	667	649	598	575	577	561	575	567	561	561	560	573	594	594	537	515	506	484	480	501	519	516
1058147	Schülp b. Nortorf	763	778	792	814	782	787	780	780	777	845	846	848	826	821	827	829	808	806	812	810	781	711	696	694	677	686	662	646	661	655
1058148	Schülp b. Rendsburg	1086	1118	1107	1112	1137	1138	1129	1123	1128	1086	1094	1107	1128	1137	1128	1121	1100	1080	1064	1055	1006	916	858	896	899	875	870	863	863	870
1058150	Schwedeneck	2809	2815	2833	2840	2790	2806	2815	2861	2888	2938	2939	2912	2968	3009	3037	3056	3100	3069	3043	3036	2955	2832	2812	2777	2717	2657	2589	2582	2575	2588
1058151	Seefeld	347	356	339	353	360	363	351	370	376	372	369	376	389	403	398	392	396	368	376	384	373	364	354	361	336	330	324	323	317	309
1058152	Sehestedt	833	834	841	850	841	832	829	848	832	846	852	848	860	876	878	871	872	875	857	836	825	809	746	702	703	680	655	637	626	626
1058153	Sören	194	186	182	182	185	180	187	185	189	198	196	197	201	205	198	189	179	189	186	180	163	140	149	144	142	134	137	138	141	137
1058154	Sophienhamm	288	300	304	319	323	330	341	344	343	346	354	351	348	361	357	353	362	370	364	370	359	345	345	337	324	325	330	318	319	309
1058155	Stafstedt	360	362	375	370	351	334	341	341	345	340	342	348	374	365	375	359	374	363	365	360	368	367	365	343	347	343	349	351	349	350
1058156	Steenfeld	334	329	332	356	363	362	378	376	387	395	383	391	383	390	402	407	425	408	424	409	401	399	380	385	371	373	367	355	362	362
1058157	Strande	1486	1489	1505	1506	1490	1486	1494	1513	1530	1481	1468	1481	1484	1476	1508	1521	1539	1526	1528	1541	1586	1616	1676	1671	1717	1704	1634	1599	1572	1592
1058158	Tackesdorf	70	71	73	69	65	73	76	75	72	89	90	93	84	84	85	82	86	81	79	79	80	80	79	86	80	85	87	85	87	78
1058159	Tappendorf	328	336	341	337	341	334	347	338	340	344	340	340	342	342	338	337	335	321	321	303	322	317	318	322	307	319	310	297	292	289
1058160	Techelsdorf	151	142	147	144	154	149	156	146	149	154	152	157	164	154	165	156	165	167	163	160	160	164	166	161	159	164	161	164	163	164
1058161	Thaden	235	241	255	253	247	258	259	260	265	274	278	277	279	297	296	296	302	306	309	302	288	267	253	269	266	273	275	278	265	271
1058162	Thumby	386	395	398	421	428	446	470	474	462	467	486	492	480	496	510	516	510	519	519	515	548	553	532	525	519	554	558	568	554	562
1058163	Timmaspe	1079	1072	1056	1071	1063	1080	1070	1083	1104	1121	1116	1131	1142	1121	1139	1158	1124	1124	1118	1134	1067	1019	975	916	859	849	846	826	852	865
1058164	Todenbüttel	1020	1007	1037	1034	1021	1018	1028	1012	1025	1074	1106	1129	1128	1134	1137	1132	1123	1112	1119	1090	1076	1039	979	975	976	954	960	953	949	972
1058165	Tüttendorf	1231	1248	1256	1271	1217	1178	1079	1060	1091	1141	1171	1175	1180	1154	1176	1182	1183	1172	1172	1179	1112	1107	1091	1060	1042	991	947	934	923	905
1058166	Waabs	1433	1440	1471	1440	1393	1386	1403	1402	1404	1442	1449	1479	1502	1452	1462	1450	1437	1412	1404	1388	1363	1310	1310	1324	1307	1270	1267	1230	1235	1227
1058167	Wapelfeld	324	286	285	299	308	316	325	319	313	328	326	343	340	350	352	336	347	360	371	335	340	302	289	289	273	251	249	232	237	219
1058168	Warder	685	676	696	685	649	645	633	620	612	623	607	599	609	621	613	619	616	616	617	590	558	544	549	535	496	472	471	447	405	403
1058169	Wasbek	2297	2321	2315	2303	2298	2239	2210	2211	2219	2213	2239	2232	2274	2238	2231	2158	2163	2134	2068	2030	2007	1965	1981	1952	1932	1938	1892	1842	1813	1775
1058170	Wattenbek	2942	2923	2954	2966	2976	2967	2962	2902	2912	2880	2876	2903	2925	2936	2921	2872	2863	2843	2784	2749	2651	2641	2635	2628	2641	2619	2569	2468	2381	2318
1058171	Westensee	1553	1597	1593	1584	1537	1523	1531	1511	1521	1582	1591	1583	1583	1600	1579	1571	1589	1596	1572	1595	1618	1615	1617	1611	1627	1599	1543	1498	1505	1486
1058172	Westerrönfeld	5044	4997	5018	5024	4933	4988	4957	4933	4901	4959	5013	5067	5097	5122	5106	5180	5205	5183	5147	5166	5073	4823	4736	4600	4447	4372	4306	4148	3981	3906
1058173	Windeby	1019	1010	1017	1028	1053	1035	1063	1034	1052	1066	1081	1057	1069	1078	1112	1109	1113	1123	1109	1112	1100	1077	1059	1058	1065	1050	1035	1008	1019	1008
1058174	Winnemark	522	526	525	512	510	517	528	511	505	532	523	517	511	509	513	506	521	536	533	535	545	539	551	545	548	536	543	519	500	490
1058175	Ahlefeld-Bistensee	481	475	488	491	496	493	498	508	488	481	482	480	482	456	437	443	427	428	442	459	443	434	424	424	412	425	401	407	402	405
1059001	Alt Bennebek	329	332	322	306	330	345	337	357	366	347	359	358	351	356	361	349	345	344	316	318	326	312	319	326	317	308	314	314	308	293
1059002	Arnis, Stadt	281	284	280	275	279	278	283	297	321	283	285	297	301	309	308	314	299	301	304	327	329	348	352	364	377	387	375	357	357	341
1059005	Bergenhusen	718	706	711	694	704	700	714	715	713	677	669	655	668	680	682	698	719	739	742	739	715	714	724	738	739	729	723	720	723	750
1059006	Böel	702	701	713	723	738	737	747	751	749	731	745	754	757	749	765	760	765	758	755	726	741	718	698	698	712	711	675	661	658	639
1059008	Böklund	1659	1651	1625	1600	1560	1485	1471	1477	1470	1417	1428	1422	1439	1436	1460	1488	1487	1496	1518	1549	1506	1485	1450	1447	1404	1348	1338	1337	1325	1315
1059009	Börm	752	766	748	753	751	744	752	727	751	745	770	755	763	780	764	765	777	806	789	796	806	799	799	789	790	799	776	797	780	794
1059010	Bollingstedt	1408	1416	1418	1417	1439	1442	1468	1482	1475	1500	1507	1485	1482	1488	1480	1481	1460	1475	1490	1478	1482	1451	1450	1427	1401	1404	1360	1305	1310	1284
1059012	Borgwedel	685	659	668	668	686	685	703	707	707	724	732	721	712	711	716	712	712	707	661	671	677	645	640	640	627	622	614	583	576	533
1059018	Busdorf	2129	2086	2072	2077	2037	2059	2046	2062	2026	2023	2030	1989	2027	2064	2032	2028	2064	1982	1936	1852	1715	1608	1594	1555	1550	1553	1515	1516	1525	1520
1059019	Dannewerk	1140	1141	1134	1123	1137	1128	1106	1111	1134	1131	1098	1103	1105	1060	1075	1082	1072	1069	1079	1075	1053	1052	1058	1058	1023	1005	1018	1020	1019	997
1059020	Dörpstedt	542	556	551	540	549	562	559	536	548	548	552	551	554	551	562	558	552	546	564	578	578	562	570	553	573	583	564	595	577	554
1059023	Ellingstedt	764	771	777	780	781	799	791	821	831	819	812	823	823	843	841	831	841	840	837	834	861	857	858	840	821	812	797	796	782	779
1059024	Erfde	1946	1904	1875	1888	1844	1878	1887	1906	1946	2006	2037	2045	2087	2120	2086	2114	2093	2068	2073	2092	2059	2059	2064	2036	2020	1985	1947	1928	1902	1871
1059026	Fahrdorf	2576	2546	2543	2520	2492	2506	2510	2498	2470	2471	2464	2471	2519	2536	2555	2586	2476	2499	2484	2429	2321	2236	2145	2071	2081	2094	2016	1941	1944	1917
1059032	Geltorf	368	359	359	356	376	366	357	377	376	404	410	408	414	426	424	424	421	411	419	408	393	365	342	341	327	313	302	297	292	297
1059034	Grödersby	207	218	222	224	214	206	215	226	232	234	252	264	269	272	270	275	269	283	290	290	285	279	261	255	269	277	269	262	255	250
1059035	Groß Rheide	872	866	867	882	884	864	879	889	914	930	934	982	1031	1030	1037	1040	1039	1022	1003	974	911	894	904	903	878	826	813	778	778	775
1059037	Havetoft	889	892	935	954	956	920	902	904	909	881	859	867	877	869	887	885	891	869	871	895	890	886	873	873	852	853	837	853	840	806
1059039	Hollingstedt	999	991	1035	1004	997	978	993	997	1009	1019	1007	999	1012	999	1023	998	997	973	975	969	965	932	922	932	897	878	853	868	846	836
1059041	Hüsby	800	814	803	769	794	803	781	779	772	775	776	777	761	761	751	745	739	726	712	695	672	650	642	633	635	613	597	579	576	575
1059042	Idstedt	903	893	905	879	860	856	848	848	857	858	855	830	835	831	844	829	828	833	820	776	727	729	738	746	751	767	778	753	776	787
1059043	Jagel	959	962	935	915	950	951	975	982	954	959	952	950	953	961	945	944	957	945	954	930	933	896	849	848	815	799	811	770	761	753
1059044	Jübek	2742	2732	2734	2728	2649	2606	2639	2626	2629	2599	2610	2576	2575	2572	2565	2543	2499	2419	2406	2395	2341	2301	2289	2265	2181	2160	2115	2051	1969	1934
1059045	Kappeln, Stadt	8567	8619	8675	8676	8709	8687	8764	8793	8878	9667	9663	9768	9816	9855	9785	9799	9807	9940	10010	9958	10138	10200	10326	10278	10128	10104	10110	10130	10210	10274
1059049	Klappholz	455	456	474	471	471	483	500	499	514	525	534	519	537	531	545	532	527	536	518	513	534	515	506	481	444	423	418	404	396	389
1059050	Klein Bennebek	545	550	530	525	531	534	532	531	526	548	557	571	588	581	576	602	587	591	574	559	569	562	560	550	583	581	605	581	566	558
1059051	Klein Rheide	327	331	332	325	339	348	314	320	327	338	339	340	335	336	358	359	349	331	343	353	352	369	341	325	312	297	296	288	275	283
1059053	Kropp	6679	6612	6576	6527	6483	6387	6382	5997	6058	6421	6447	6468	6466	6407	6395	6419	6336	6352	6302	6338	6384	6344	5978	5740	5547	5503	5480	5372	5379	5405
1059055	Loit	262	256	259	256	270	254	246	250	265	266	268	271	255	255	268	275	277	272	273	268	278	257	256	255	253	241	249	255	238	238
1059056	Lottorf	260	260	253	240	237	231	227	230	228	223	212	202	210	203	199	198	206	212	220	197	213	204	209	199	182	190	180	186	194	192
1059057	Lürschau	1105	1100	1090	1079	1105	1102	1092	1115	1117	1139	1168	1167	1159	1130	1122	1105	1110	1119	1111	1094	1071	942	897	887	900	889	885	874	847	847
1059058	Meggerdorf	676	671	691	675	683	669	685	684	703	669	702	687	678	693	699	691	700	699	706	739	758	748	741	705	710	700	712	701	698	697
1059060	Mohrkirch	958	967	966	969	985	1010	1000	1009	1023	990	999	1029	1020	1020	1007	1041	1035	1033	1045	1043	1045	1030	1054	1027	1027	1029	1032	1058	1045	1015
1059062	Neuberend	1164	1143	1138	1117	1108	1083	1083	1080	1096	1124	1135	1151	1150	1143	1124	1118	1135	1128	1144	1145	1152	1145	1144	1151	1103	1076	1023	986	967	968
1059063	Norderbrarup	641	633	651	639	640	652	660	642	635	648	667	691	672	676	682	683	696	704	684	675	650	639	591	549	504	494	477	474	477	469
1059065	Nottfeld	120	119	124	124	135	141	140	141	145	141	144	141	137	139	146	151	152	147	147	149	150	150	145	127	128	133	139	147	138	132
1059067	Oersberg	307	312	302	292	300	297	302	311	317	345	348	343	355	339	348	340	322	321	321	342	350	353	323	331	325	325	313	319	302	306
1059068	Rabenkirchen-Faulück	649	632	631	648	631	619	630	639	643	650	650	653	649	660	678	680	676	669	690	689	711	682	674	674	653	662	662	662	652	662
1059070	Rügge	249	242	232	231	223	235	244	240	241	234	252	245	242	237	231	236	223	220	219	204	213	208	204	222	231	233	233	226	223	214
1059072	Saustrup	186	192	193	200	203	208	209	211	210	213	213	217	221	229	234	237	234	227	216	217	221	211	201	196	197	191	190	178	196	197
1059073	Schaalby	1563	1555	1563	1591	1590	1588	1602	1596	1645	1662	1664	1689	1688	1700	1695	1687	1701	1702	1658	1634	1647	1585	1565	1522	1470	1422	1402	1363	1306	1322
1059074	Scheggerott	366	373	366	371	366	361	358	368	378	366	388	392	380	390	394	401	394	400	409	419	404	406	395	399	389	355	369	359	335	341
1059075	Schleswig, Stadt	25416	25276	25118	24773	24266	24035	23635	23665	23812	24058	24061	24029	24036	24121	24071	24237	24288	24466	24679	25093	25443	25832	26350	26497	26606	26741	26857	26880	26938	26998
1059076	Schnarup-Thumby	549	549	541	548	553	553	568	577	578	586	584	593	599	607	619	613	598	598	609	622	580	568	573	567	577	566	563	564	564	551
1059077	Schuby	2689	2693	2680	2659	2567	2574	2531	2535	2559	2540	2560	2576	2592	2583	2603	2596	2551	2572	2555	2515	2488	2483	2330	2242	2204	2199	2179	2209	2169	2157
1059078	Selk	866	874	877	876	864	854	868	858	858	873	840	836	825	811	813	804	807	778	764	755	763	743	745	728	749	744	761	747	757	734
1059079	Silberstedt	2306	2253	2250	2230	2139	2154	2178	2171	2189	2197	2201	2218	2239	2250	2284	2253	2236	2260	2236	2263	2209	2136	2067	1945	1911	1884	1825	1735	1687	1715
1059080	Steinfeld	809	804	800	782	767	753	754	768	754	747	762	748	744	729	752	739	734	730	748	743	710	683	683	669	640	627	624	629	616	627
1059081	Stolk	800	785	786	781	781	785	781	803	819	797	809	819	824	836	836	861	876	866	847	854	886	869	852	854	843	865	822	808	781	781
1059082	Struxdorf	637	636	647	652	654	648	643	646	652	653	667	659	671	705	693	691	679	675	678	684	697	704	724	708	687	712	727	714	708	682
1059083	Süderbrarup	5084	5000	4954	4954	4879	4742	4757	4779	4770	4594	4557	4530	4556	4506	4563	4519	4530	4522	4494	4466	4481	4320	4251	4290	4280	4101	4036	4002	3929	3870
1059084	Süderfahrenstedt	461	459	465	478	480	469	486	493	498	504	511	504	519	512	536	536	526	531	509	501	474	471	456	429	410	404	395	392	399	401
1059086	Taarstedt	898	898	906	897	918	909	890	876	879	870	873	864	885	876	895	912	887	915	917	906	902	898	897	869	874	838	800	786	829	801
1059087	Tetenhusen	951	945	975	960	949	948	954	958	945	929	945	953	948	937	957	947	915	881	888	857	841	811	799	796	828	806	795	769	753	770
1059088	Tielen	292	282	290	289	284	287	294	291	294	300	306	309	307	310	302	308	329	329	337	335	349	341	333	328	324	331	315	320	322	328
1059090	Tolk	1041	1018	1014	1035	1011	1018	1041	1034	1053	1042	1032	1043	1056	1060	1064	1059	1078	1059	1085	1084	1047	1025	1032	1013	1012	1011	967	941	922	932
1059092	Treia	1560	1567	1566	1553	1533	1512	1519	1519	1508	1418	1463	1465	1480	1497	1515	1490	1527	1540	1523	1493	1486	1453	1448	1429	1387	1381	1368	1365	1383	1350
1059093	Ülsby	437	428	434	430	416	427	434	426	435	455	449	470	469	461	469	476	473	482	478	498	483	492	487	476	475	470	469	470	446	453
1059094	Ulsnis	670	658	664	656	671	673	671	689	685	660	679	683	679	706	677	651	633	632	625	646	648	649	656	641	644	654	650	660	655	640
1059095	Wagersrott	214	222	231	225	234	243	240	239	249	243	251	249	246	231	231	237	233	241	248	243	248	264	260	258	259	259	266	270	269	272
1059096	Wohlde	483	496	491	477	486	496	504	502	512	543	505	518	530	530	529	533	548	522	523	554	547	534	520	523	517	490	484	488	504	504
1059097	Twedt	532	517	524	535	544	527	505	510	513	510	483	477	493	502	502	506	509	506	508	516	486	470	478	476	469	407	424	425	423	429
1059098	Nübel	1287	1322	1322	1318	1344	1309	1357	1362	1366	1355	1375	1385	1383	1377	1376	1395	1388	1350	1315	1307	1313	1323	1330	1323	1307	1306	1279	1284	1274	1284
1059101	Tastrup	404	417	420	415	420	421	417	411	423	419	430	431	429	448	444	438	448	432	432	442	436	425	421	414	416	418	424	414	407	426
1059102	Ahneby	196	193	199	192	196	209	214	222	220	224	208	219	232	223	221	211	241	238	229	232	245	239	231	221	226	229	219	215	207	208
1059103	Ausacker	531	533	530	529	524	537	542	535	522	498	518	530	536	543	553	565	543	565	567	552	552	547	550	544	533	534	516	526	520	515
1059105	Böxlund	101	97	98	99	97	96	106	100	101	106	109	106	111	105	115	115	113	119	118	117	106	108	101	100	105	99	106	106	105	106
1059106	Dollerup	1021	1000	1012	1029	999	1014	994	1007	1024	1031	1011	1038	1039	1041	1045	1065	1049	1063	1075	1047	1024	1017	1010	967	989	978	934	919	923	907
1059107	Eggebek	2455	2415	2393	2397	2248	2276	2268	2198	2218	2535	2561	2564	2539	2585	2600	2632	2594	2566	2568	2554	2539	2476	2366	2358	2359	2365	2408	2160	1881	1864
1059109	Esgrus	822	795	779	779	771	778	765	785	788	811	782	800	814	831	828	841	857	844	843	827	855	869	830	853	868	875	893	886	901	878
1059112	Gelting	2082	1992	1976	1995	1996	1977	1970	1988	1958	1866	1855	1837	1817	1824	1808	1836	1864	1861	1855	1892	1846	1855	1875	1867	1842	1848	1837	1820	1846	1896
1059113	Glücksburg (Ostsee), Stadt	6114	6124	5987	5995	5850	5820	5834	5759	5810	5952	5911	5961	5982	5945	6014	5929	5968	5990	6024	6025	6058	6077	6179	6342	6444	6469	6541	6575	6510	6562
1059115	Großenwiehe	3021	3021	3003	3017	2983	2975	2910	2886	2885	2804	2811	2807	2827	2804	2811	2820	2785	2741	2710	2627	2569	2529	2495	2379	2279	2211	2197	2157	2134	2107
1059116	Großsolt	1804	1793	1771	1786	1793	1784	1777	1804	1812	1840	1866	1898	1871	1902	1912	1902	1900	1931	1926	1896	1872	1874	1847	1800	1752	1734	1736	1700	1702	1644
1059118	Grundhof	876	894	859	858	873	833	843	845	852	885	906	912	928	926	941	954	951	922	908	907	902	916	919	917	915	900	908	904	856	874
1059120	Harrislee	11616	11531	11556	11433	11285	11190	11040	11012	10905	11422	11420	11315	11327	11354	11345	11525	11506	11416	11319	11239	10968	10980	10907	10872	10818	10749	10721	10600	10632	10474
1059121	Hasselberg	813	826	789	803	844	821	841	867	895	872	890	897	908	899	917	938	944	1059	1052	1077	1051	971	947	935	947	918	899	902	861	851
1059123	Hörup	619	622	598	615	607	612	614	632	649	632	645	639	651	643	635	624	637	636	628	608	585	594	585	586	568	567	558	555	549	543
1059124	Holt	168	166	177	169	184	179	198	188	189	182	177	182	175	188	190	198	192	205	211	201	205	192	192	200	179	177	180	181	177	167
1059126	Hürup	1236	1240	1239	1244	1229	1202	1217	1223	1232	1152	1157	1135	1179	1205	1172	1186	1192	1204	1195	1154	1128	1102	1097	1099	1101	1079	1050	1057	1059	1091
1059127	Husby	2354	2353	2320	2293	2296	2362	2333	2310	2295	2207	2203	2233	2202	2213	2278	2234	2236	2232	2138	2131	2083	2099	2055	1972	1927	1916	1782	1773	1759	1742
1059128	Janneby	409	395	396	396	411	423	407	410	418	453	440	445	429	450	438	432	436	447	446	431	441	452	453	447	430	431	431	413	428	422
1059129	Jardelund	314	313	312	325	324	323	328	319	322	312	315	320	302	317	316	320	330	309	310	318	322	334	344	325	292	294	294	290	288	292
1059131	Jerrishoe	960	953	948	950	945	947	957	983	960	989	975	997	989	998	981	1022	1027	1014	1000	971	942	903	868	858	807	765	725	717	712	722
1059132	Jörl	736	714	702	732	739	729	723	723	742	821	824	839	830	835	844	844	852	822	811	804	789	784	754	731	710	697	665	641	640	650
1059136	Kronsgaard	244	237	233	233	246	248	237	232	243	234	242	251	258	254	254	242	242	232	248	262	255	262	274	292	292	285	277	271	282	279
1059137	Langballig	1549	1523	1529	1555	1535	1529	1547	1575	1598	1484	1482	1476	1468	1462	1476	1457	1469	1436	1439	1374	1325	1273	1162	1130	1134	1132	1116	1102	1049	991
1059138	Langstedt	1052	1047	1038	1020	1031	1019	1004	1015	1029	1051	1032	1020	1016	1035	1016	1028	1005	974	941	956	934	925	900	873	849	837	851	822	825	824
1059141	Maasbüll	697	694	682	696	693	694	698	701	722	724	731	731	740	722	738	750	734	724	716	704	704	695	726	721	726	738	729	707	694	701
1059142	Maasholm	588	583	581	597	593	594	617	622	641	641	639	657	674	662	677	686	702	707	695	705	709	726	718	712	706	740	741	723	726	709
1059143	Medelby	977	954	958	956	920	915	921	895	879	891	898	896	903	899	893	873	888	898	885	882	909	900	900	899	864	817	788	780	780	792
1059144	Meyn	735	749	743	749	741	734	721	705	699	690	675	674	647	638	618	617	582	553	558	536	529	546	555	540	543	536	492	490	493	496
1059145	Munkbrarup	1155	1149	1127	1134	1115	1093	1118	1101	1097	1085	1086	1087	1064	1068	1052	1037	1065	1057	1059	1067	1046	1052	1025	965	929	924	912	901	920	930
1059147	Nieby	130	131	129	130	136	139	139	153	144	221	226	232	220	224	232	238	235	238	236	239	238	244	241	255	261	268	276	267	262	249
1059148	Niesgrau	529	537	547	561	573	587	579	601	613	595	589	585	609	596	604	608	606	612	608	602	586	580	559	537	527	543	556	555	545	536
1059149	Nordhackstedt	479	463	483	457	443	451	456	462	485	486	479	482	489	483	506	511	513	510	518	493	464	430	425	453	430	440	440	454	455	431
1059151	Osterby	314	312	307	305	314	309	308	313	312	341	343	338	341	335	347	355	352	345	338	339	320	329	322	316	307	307	307	308	288	288
1059152	Pommerby	153	159	159	157	156	150	155	160	163	161	168	182	181	191	189	195	198	192	208	216	215	217	226	228	226	225	227	220	217	213
1059154	Rabel	634	628	624	629	632	654	656	643	631	659	650	660	647	637	634	634	620	589	580	590	584	584	576	571	564	546	540	526	522	504
1059155	Rabenholz	287	280	282	281	274	288	269	274	288	293	294	299	298	296	318	317	310	316	305	294	280	291	259	266	270	267	271	282	281	280
1059157	Ringsberg	545	548	543	573	552	559	554	556	532	508	512	515	523	521	530	521	500	500	487	479	464	448	437	423	409	387	391	386	391	387
1059158	Schafflund	2711	2647	2632	2565	2489	2448	2446	2463	2467	2375	2363	2300	2331	2347	2296	2309	2305	2287	2244	2187	2130	2036	1926	1850	1743	1712	1743	1645	1629	1621
1059159	Sieverstedt	1642	1633	1641	1630	1624	1610	1623	1621	1653	1660	1651	1673	1662	1671	1654	1686	1660	1667	1633	1637	1677	1613	1622	1605	1587	1584	1546	1575	1596	1542
1059161	Sörup	4303	4318	4311	4273	4188	4214	4289	4262	4314	4185	4260	4251	4248	4257	4194	4172	4144	4171	4160	4163	4165	4128	4136	4099	3931	3913	3928	3896	3835	3858
1059162	Sollerup	495	487	487	488	477	491	496	495	487	500	505	516	520	503	499	495	483	508	512	498	502	514	508	505	488	487	474	472	477	468
1059163	Stangheck	204	204	217	227	221	231	236	226	227	227	240	250	238	244	247	243	258	258	258	246	260	270	251	246	258	260	264	273	251	245
1059164	Steinberg	797	810	830	831	856	860	853	869	856	900	907	937	977	995	983	1006	1011	991	990	982	978	1010	1023	982	981	978	1001	982	952	913
1059167	Sterup	1332	1344	1345	1381	1391	1382	1381	1373	1383	1391	1408	1450	1435	1423	1489	1497	1481	1514	1495	1508	1492	1466	1492	1486	1488	1483	1470	1447	1428	1440
1059168	Stoltebüll	709	692	714	708	714	740	741	773	769	832	840	818	822	821	842	853	859	846	849	850	842	836	817	801	765	743	750	721	699	684
1059169	Süderhackstedt	339	343	354	337	338	339	331	334	343	355	354	343	333	349	346	341	343	329	317	314	320	326	334	331	317	320	323	323	312	315
1059171	Tarp	5811	5651	5550	5528	5372	5218	5181	5128	5148	5510	5563	5581	5614	5566	5720	5770	5814	5920	5897	5749	5647	5659	5584	5494	5238	5015	4986	4933	4928	4958
1059173	Wallsbüll	928	919	933	923	915	875	883	903	891	907	902	919	911	914	923	900	877	862	847	842	837	816	834	820	824	815	834	803	787	766
1059174	Wanderup	2480	2498	2497	2426	2395	2288	2181	2159	2166	2216	2237	2204	2213	2235	2219	2201	2220	2171	2198	2209	2080	2062	2056	2067	2003	1941	1926	1885	1850	1855
1059176	Wees	2378	2420	2405	2378	2350	2258	2210	2236	2246	2295	2299	2303	2322	2322	2273	2304	2243	2239	2199	2213	2113	2059	2025	1967	1843	1786	1604	1546	1491	1438
1059177	Weesby	443	442	428	435	438	434	444	465	469	480	492	482	491	474	481	486	465	451	463	480	470	463	474	471	456	488	463	469	470	485
1059178	Westerholz	748	731	734	741	727	718	731	741	766	776	771	770	794	758	744	731	724	707	668	664	632	632	615	614	609	597	599	581	590	576
1059179	Lindewitt	1959	1979	1924	1946	1964	1991	1985	1980	2002	2103	2075	2066	2085	2063	2070	2098	2132	2150	2127	2128	2093	2096	2074	2081	2012	1994	1962	1871	1854	1878
1059182	Freienwill	1586	1611	1604	1614	1552	1579	1567	1554	1556	1512	1527	1514	1513	1471	1478	1462	1477	1468	1480	1442	1430	1375	1327	1241	1206	1233	1224	1225	1203	1177
1059183	Handewitt	11110	11040	11081	11059	10968	10982	10851	10878	10801	10828	10816	10700	10595	10573	10556	10468	10392	10205	10008	9936	9913	9568	9367	9095	8789	8462	8151	8032	7930	7715
1059184	Oeversee	3439	3409	3415	3444	3374	3319	3362	3316	3322	3369	3403	3414	3414	3403	3428	3393	3347	3340	3316	3364	3315	3303	3249	3200	3188	3089	3003	2965	2976	2995
1059185	Mittelangeln	5239	5167	5172	5141	5117	5041	5036	4969	4929	4933	4933	4943	4920	4878	4907	4836	4832	4736	4705	4608	4535	4449	4274	4182	4209	4193	4199	4161	4159	4114
1059186	Steinbergkirche	2685	2703	2747	2774	2761	2766	2785	2772	2796	2630	2667	2687	2707	2770	2754	2777	2793	2797	2760	2758	2772	2734	2749	2674	2710	2657	2646	2643	2634	2619
1059187	Boren	1161	1153	1154	1124	1180	1135	1163	1153	1158	1171	1172	1182	1202	1223	1216	1249	1284	1262	1260	1264	1306	1286	1286	1275	1266	1288	1300	1324	1289	1275
1059188	Stapel	1818	1807	1792	1768	1779	1767	1803	1837	1878	1837	1853	1896	1882	1907	1909	1909	1897	1912	1913	1910	1886	1902	1886	1828	1806	1807	1778	1779	1786	1784
1059189	Brodersby-Goltoft	688	685	694	721	725	733	737	757	762	710	722	706	723	720	745	747	767	768	751	745	734	723	733	760	739	740	723	715	698	695
1060002	Alveslohe	2754	2731	2782	2790	2717	2637	2626	2628	2600	2543	2575	2594	2582	2555	2524	2498	2475	2502	2466	2439	2400	2382	2340	2301	2316	2235	2213	2169	2120	2060
1060003	Armstedt	382	379	398	395	393	393	407	411	395	403	401	406	413	411	418	408	407	401	402	404	408	382	380	381	374	364	356	358	360	354
1060004	Bad Bramstedt, Stadt	14773	14420	14278	14139	13906	13759	13576	13596	13631	13852	13686	13730	13569	13522	13418	13271	13079	12981	12890	12572	12469	12161	11768	11518	11275	11039	10515	10292	10052	9824
1060005	Bad Segeberg, Stadt	17381	17267	17273	17427	17176	16971	16732	16581	16534	15767	15874	15893	15989	15938	15918	15931	16076	16101	16103	16042	15941	15988	15888	15665	15595	15438	15362	15234	14916	14918
1060006	Bahrenhof	215	207	212	217	223	213	216	207	200	201	212	211	214	212	208	207	203	211	205	189	202	191	181	181	175	170	178	180	175	170
1060007	Bark	944	982	978	997	1003	983	1014	999	1001	1003	975	978	977	989	986	992	988	960	961	951	945	944	916	888	916	887	882	871	861	855
1060008	Bebensee	651	639	618	617	613	632	641	634	626	608	612	603	613	591	584	584	584	572	580	552	543	523	539	546	546	559	560	576	576	556
1060009	Bimöhlen	1011	995	984	990	954	957	955	943	932	953	959	954	923	904	934	934	935	904	944	917	899	893	825	800	804	765	761	729	721	704
1060010	Blunk	580	590	594	595	574	589	590	616	619	602	594	600	612	604	577	579	573	549	541	552	539	513	493	499	472	462	458	426	425	412
1060011	Boostedt	7124	7570	6920	6693	5326	4631	4588	4579	4570	4633	4604	4627	4594	4566	4586	4598	4556	4483	4502	4479	4467	4411	4393	4376	4370	4305	4196	4013	3794	3770
1060012	Bornhöved	3271	3275	3280	3232	3286	3277	3329	3360	3361	3420	3430	3464	3446	3483	3479	3463	3483	3429	3420	3443	3369	3274	3161	3026	2857	2809	2735	2772	2747	2683
1060013	Borstel	129	128	130	128	131	129	120	119	118	123	129	127	127	127	127	132	142	137	139	147	143	143	144	149	140	130	122	126	118	119
1060015	Bühnsdorf	366	367	366	369	344	341	342	338	345	349	348	354	361	370	365	364	351	369	373	388	397	404	390	396	396	388	375	370	371	370
1060016	Daldorf	648	653	642	657	656	673	663	654	648	649	664	699	695	715	718	719	740	728	738	728	687	650	630	609	609	614	617	609	594	592
1060017	Damsdorf	223	235	234	232	232	226	229	229	236	244	241	232	246	247	248	256	252	245	257	260	252	254	271	275	267	257	231	225	222	221
1060018	Dreggers	51	51	55	56	53	56	59	56	59	57	56	58	62	61	52	56	58	60	62	59	55	53	53	54	52	51	48	49	46	49
1060019	Ellerau	6319	6219	6182	6069	6035	6051	5911	5852	5837	5819	5738	5673	5645	5671	5558	5410	5386	5274	5005	4881	4792	4836	4892	4920	4991	5008	4941	4937	4905	4861
1060020	Fahrenkrug	1651	1638	1675	1643	1583	1568	1537	1542	1527	1629	1627	1610	1646	1610	1628	1638	1687	1677	1639	1636	1638	1590	1616	1609	1590	1563	1467	1439	1394	1348
1060021	Föhrden-Barl	302	298	302	304	294	290	295	295	298	291	294	298	295	285	283	301	292	293	284	276	273	262	255	259	243	226	231	236	244	235
1060022	Fredesdorf	399	404	406	411	390	367	368	382	381	385	375	365	381	380	357	370	359	355	359	358	330	328	316	326	321	306	307	299	286	281
1060023	Fuhlendorf	407	415	426	420	426	433	429	418	422	382	405	392	392	397	391	378	374	367	369	362	366	359	363	355	350	393	406	414	366	404
1060024	Geschendorf	576	563	567	566	545	541	529	526	534	547	556	563	546	558	525	520	504	515	495	478	469	481	490	481	466	476	466	439	439	424
1060025	Glasau	874	893	907	911	915	912	915	893	919	921	946	942	950	968	974	983	985	993	969	953	975	946	963	928	912	904	862	832	811	784
1060026	Gönnebek	490	489	478	471	468	470	473	484	490	476	477	471	481	485	503	484	484	484	491	492	488	473	454	430	403	387	393	394	385	378
1060027	Großenaspe	2984	2935	2906	2901	2883	2884	2820	2829	2800	2777	2748	2772	2839	2827	2836	2851	2837	2825	2810	2768	2699	2624	2500	2392	2316	2236	2193	2160	2136	2077
1060028	Groß Kummerfeld	1928	1924	1937	1943	1909	1925	1920	1934	1959	1990	1980	1988	2003	2001	2017	1956	1934	1910	1865	1826	1821	1769	1674	1683	1663	1647	1676	1611	1585	1562
1060029	Groß Niendorf	676	675	669	676	668	655	643	653	660	673	661	663	681	674	644	637	622	623	623	617	605	603	613	615	606	580	582	595	575	574
1060030	Groß Rönnau	570	584	594	583	577	560	573	574	590	605	610	621	618	590	591	572	554	560	551	558	517	500	479	462	459	471	461	462	446	447
1060031	Hagen	482	488	488	495	505	494	446	470	460	412	339	373	387	374	369	368	385	389	409	435	460	455	463	481	475	476	465	446	411	403
1060033	Hardebek	472	456	450	456	459	465	470	460	465	466	468	470	493	504	499	509	509	504	498	500	479	489	510	464	457	462	463	448	453	444
1060034	Hartenholm	1894	1815	1837	1818	1832	1786	1755	1799	1779	1774	1770	1765	1793	1752	1773	1822	1787	1766	1723	1695	1671	1639	1651	1652	1652	1610	1595	1600	1583	1542
1060035	Hasenkrug	340	333	334	339	336	336	337	354	352	355	356	357	366	361	360	369	362	364	369	368	374	365	352	349	337	329	315	291	280	286
1060036	Hasenmoor	766	702	712	730	717	703	724	689	698	700	696	694	711	697	695	707	710	689	676	643	654	655	675	660	643	643	645	630	631	631
1060037	Heidmoor	308	315	320	302	302	321	325	333	322	319	313	297	303	316	325	323	324	318	291	290	280	275	262	245	245	252	250	248	249	241
1060038	Heidmühlen	669	681	674	692	697	689	695	700	713	713	732	719	713	707	689	683	675	678	669	680	675	679	677	645	634	651	634	620	607	609
1060039	Henstedt-Ulzburg	28104	28070	28056	28065	27705	27517	27269	27199	26990	27189	26847	26529	26560	26402	26242	26031	25797	25520	25266	24950	24539	24148	23996	23761	23453	23267	22903	22463	21805	21402
1060040	Hitzhusen	1238	1272	1245	1260	1251	1268	1258	1261	1280	1315	1309	1277	1284	1297	1280	1269	1251	1278	1305	1282	1249	1215	1186	1111	1070	1068	1051	1039	1024	1007
1060041	Högersdorf	406	401	408	408	417	414	415	410	408	405	410	403	395	413	410	415	383	364	327	301	281	286	282	267	279	287	298	275	272	265
1060042	Hüttblek	378	371	382	379	371	367	366	353	364	374	368	358	365	370	354	352	347	339	347	330	328	323	317	314	308	301	288	288	293	276
1060043	Itzstedt	2265	2329	2348	2358	2380	2387	2364	2369	2365	2264	2236	2237	2240	2230	2230	2210	2168	2185	2165	2074	1858	1632	1451	1425	1357	1366	1357	1358	1324	1303
1060044	Kaltenkirchen, Stadt	22109	21813	21386	20852	20331	20145	20080	19904	19747	20000	19865	19868	19832	19739	19684	19540	19181	18626	18360	18081	17793	17399	17116	16917	16672	16060	15170	14562	13922	13547
1060045	Kattendorf	856	837	847	858	851	859	843	856	868	838	848	860	873	896	908	911	908	902	934	930	910	854	789	776	762	784	784	766	767	759
1060046	Kayhude	1182	1162	1163	1180	1209	1191	1196	1176	1143	1116	1092	1118	1106	1084	1116	1124	1120	1049	1012	1003	995	984	969	952	929	891	846	866	842	861
1060047	Kisdorf	3963	3938	3900	3850	3812	3811	3796	3755	3731	3681	3662	3601	3575	3580	3487	3412	3397	3349	3300	3290	3257	3187	3090	3010	2953	2921	2915	2911	2860	2862
1060049	Klein Rönnau	1764	1690	1643	1600	1590	1547	1518	1518	1512	1493	1456	1444	1437	1434	1439	1437	1467	1442	1418	1399	1416	1403	1360	1270	1219	1196	1177	1140	1093	1088
1060050	Krems II	397	410	404	410	413	412	417	428	421	430	445	436	438	425	430	427	420	416	418	410	394	385	388	381	383	362	354	354	339	322
1060051	Kükels	452	430	439	437	442	445	440	441	452	436	430	434	432	437	443	431	422	437	435	421	426	430	431	417	414	400	398	405	403	401
1060052	Latendorf	606	587	590	590	575	581	589	589	586	571	585	606	611	607	599	613	598	588	595	602	587	566	525	507	492	475	488	481	486	472
1060053	Leezen	1740	1754	1716	1719	1742	1731	1723	1743	1749	1700	1687	1639	1649	1624	1638	1625	1649	1621	1603	1592	1619	1573	1518	1434	1410	1427	1405	1413	1402	1361
1060054	Lentföhrden mit Schmalfeld	4578	4495	4534	4454	4399	4355	4367	4338	4261	4204	4194	4202	4221	4259	4232	4202	4205	4193	4210	4193	4106	4032	3948	3892	3850	3601	3596	3508	3416	3374
1060056	Mönkloh	238	244	247	246	250	240	253	250	239	249	241	249	260	262	262	258	265	262	252	252	248	236	235	232	238	234	229	236	240	244
1060057	Mözen	430	438	436	420	442	440	438	435	430	461	452	454	461	456	457	448	454	447	427	426	424	423	420	401	406	399	413	406	411	401
1060058	Nahe	2444	2396	2377	2391	2356	2352	2358	2366	2370	2422	2419	2422	2433	2375	2377	2372	2402	2370	2371	2340	2301	2227	2205	2203	2179	2159	2146	2088	2058	2035
1060059	Negernbötel	989	976	998	997	992	991	1014	1012	1001	1083	1063	1075	1067	1041	1048	1038	1026	1020	1009	947	908	909	874	860	855	853	824	797	779	784
1060060	Nehms	558	567	559	538	557	564	557	556	562	568	566	579	585	602	597	584	557	567	571	574	582	575	539	516	489	499	504	488	486	478
1060061	Neuengörs	811	798	800	804	783	797	778	753	780	785	782	798	804	831	824	876	884	853	839	820	806	798	784	753	711	668	650	645	628	634
1060062	Neversdorf	719	711	729	736	708	717	702	706	699	744	752	741	723	719	710	708	695	713	695	680	640	640	628	646	619	618	599	615	627	633
1060063	Norderstedt, Stadt	79357	79159	78679	77996	76712	76030	75394	74574	74094	71992	71970	71929	71903	71603	71330	71377	71695	71990	72016	71523	71056	70760	70492	70147	69766	69517	69916	69485	69028	68450
1060064	Nützen	1192	1165	1167	1166	1143	1169	1158	1168	1161	1187	1171	1159	1176	1172	1154	1143	1162	1157	1160	1153	1156	1101	1079	1076	1021	990	958	920	834	783
1060065	Oering	1382	1362	1322	1345	1325	1331	1296	1302	1302	1306	1281	1292	1282	1294	1311	1307	1302	1278	1259	1235	1219	1173	1149	1130	1108	1075	1028	977	974	958
1060066	Oersdorf	885	877	856	870	874	874	866	853	832	867	850	841	845	866	867	867	884	878	880	849	836	838	839	828	803	784	785	765	775	781
1060067	Pronstorf	1625	1628	1633	1621	1632	1625	1646	1652	1639	1671	1694	1706	1708	1717	1705	1667	1672	1654	1626	1589	1605	1578	1536	1445	1395	1378	1286	1260	1240	1211
1060068	Rickling	3104	3128	3117	3173	3134	3145	3158	3181	3219	3244	3278	3279	3312	3330	3384	3354	3303	3278	3305	3320	3358	3336	3283	3264	3267	3245	3392	3379	3424	3394
1060069	Rohlstorf	1272	1267	1267	1261	1196	1187	1192	1185	1201	1215	1188	1190	1166	1156	1133	1125	1098	1086	1084	1055	992	988	970	997	979	946	870	876	856	835
1060070	Schackendorf	909	891	861	838	772	836	844	822	786	817	811	806	814	820	830	799	792	800	799	801	788	807	808	784	755	759	751	792	760	760
1060071	Schieren	260	262	268	271	276	290	281	282	287	279	282	287	283	280	282	269	267	267	266	266	276	273	266	270	262	263	260	254	251	257
1060072	Schmalensee	486	478	469	472	462	449	448	435	453	466	471	475	471	486	493	505	498	503	491	518	521	520	525	523	488	469	468	449	420	388
1060074	Schwissel	258	265	265	271	253	248	258	245	249	254	258	263	242	224	234	256	244	248	244	239	247	248	216	227	231	231	224	243	243	240
1060075	Seedorf	2178	2186	2187	2165	2165	2133	2106	2142	2167	2224	2202	2223	2203	2235	2237	2245	2242	2188	2155	2113	2113	2077	2030	1961	1999	1905	1907	1862	1839	1794
1060076	Seth	1937	1982	2000	2016	1973	1975	1951	1940	1945	1908	1896	1918	1929	1975	1947	1944	1961	1898	1923	1880	1826	1803	1803	1774	1758	1742	1682	1698	1665	1607
1060077	Sievershütten	1098	1108	1144	1178	1182	1161	1163	1163	1174	1174	1172	1190	1171	1178	1179	1180	1174	1187	1160	1135	1093	1066	1063	1036	928	874	877	873	870	868
1060079	Stipsdorf	244	238	231	217	229	233	236	212	210	209	208	226	226	228	220	219	230	219	213	218	226	221	210	219	215	213	198	206	193	179
1060080	Stocksee	404	415	398	422	412	402	393	395	408	427	406	420	429	434	466	435	441	421	413	412	412	440	421	416	408	393	403	374	357	360
1060081	Strukdorf	261	262	257	257	263	264	269	266	254	252	250	255	250	258	255	261	261	268	273	274	277	280	286	288	295	302	314	316	302	292
1060082	Struvenhütten	970	983	981	1002	1005	995	1012	1007	1015	1099	1076	1086	1068	1057	1104	1093	1066	1070	1072	1050	1034	1038	1023	945	906	869	869	856	872	874
1060084	Stuvenborn	870	851	851	861	864	886	885	883	871	888	889	900	904	907	909	905	901	909	927	930	928	925	924	923	902	885	834	799	761	758
1060085	Sülfeld	3280	3246	3213	3186	3175	3135	3148	3202	3226	3385	3384	3369	3364	3345	3372	3383	3349	3349	3314	3245	3231	3139	3076	3021	2964	2929	2807	2732	2698	2648
1060086	Tarbek	158	155	148	155	150	159	160	161	163	158	159	162	165	162	172	172	177	181	163	173	164	156	164	168	170	171	171	173	165	166
1060087	Tensfeld	669	682	692	699	701	687	696	697	734	706	726	717	735	722	714	747	775	749	729	706	660	617	579	558	564	529	536	537	530	535
1060088	Todesfelde	1090	1082	1072	1082	1096	1069	1039	1016	1024	1020	1028	1021	1033	1038	1038	1030	1016	992	1018	1022	993	979	970	937	934	925	854	839	800	782
1060089	Trappenkamp	5187	5252	5194	5141	5137	5065	5041	5018	5078	4974	4884	4643	4947	4991	5055	5105	5188	5265	5286	5254	5347	5421	5590	5696	5746	5668	5626	5601	5561	5532
1060090	Travenhorst	206	205	204	201	216	218	217	226	220	204	200	206	192	187	202	192	199	186	187	192	184	183	190	188	203	196	199	202	200	193
1060092	Wahlstedt, Stadt	9751	9596	9490	9397	9347	9284	9236	9295	9317	9261	9211	9381	9402	9459	9407	9406	9510	9467	9504	9506	9619	9759	9945	10078	10096	9952	9819	9731	9585	9486
1060093	Wakendorf I	485	476	464	451	441	441	431	434	427	430	413	429	438	427	430	417	403	415	396	397	396	386	405	408	394	380	375	373	354	351
1060094	Wakendorf II	1347	1353	1365	1347	1346	1368	1360	1371	1368	1401	1416	1428	1394	1406	1389	1413	1359	1359	1351	1329	1306	1309	1309	1275	1242	1183	1173	1135	1082	1046
1060095	Weddelbrook	1045	1038	1041	1013	1020	1039	1005	1024	1032	1020	1001	1014	1026	1026	1053	1032	1024	1023	999	942	904	906	873	873	813	806	802	807	790	795
1060096	Weede	1015	1031	1021	1028	1024	1026	1056	1030	1027	1027	1023	1031	1045	1027	1011	1003	1002	1012	976	962	941	929	898	907	894	870	875	879	863	856
1060097	Wensin	831	824	831	834	835	852	858	862	853	823	817	824	815	811	811	813	807	817	796	762	769	746	752	745	737	758	745	740	708	678
1060098	Westerrade	446	439	460	470	465	477	485	472	475	474	470	485	490	489	477	481	499	486	484	507	510	497	487	467	451	450	453	454	440	436
1060099	Wiemersdorf	1709	1715	1655	1640	1630	1569	1576	1562	1554	1568	1572	1559	1539	1525	1516	1520	1513	1506	1498	1482	1454	1401	1357	1351	1324	1285	1264	1223	1198	1164
1060100	Winsen	382	388	396	370	392	381	406	400	423	399	389	404	408	392	423	418	427	414	417	420	421	393	376	376	361	356	364	367	345	345
1060101	Wittenborn	975	973	953	930	857	876	864	877	848	827	832	827	817	848	837	791	790	775	784	789	787	767	750	737	754	742	731	741	740	743
1060102	Groß Gladebrügge	1070	1065	1058	1073	1095	1045	1075	1079	1066	1075	1112	1107	1127	1139	1129	1136	1132	1113	1053	1029	1013	1002	981	1002	975	969	932	944	931	918
1061001	Aasbüttel	139	140	145	139	130	127	129	124	118	108	103	98	96	104	103	107	100	107	93	105	98	97	97	99	94	92	92	100	102	99
1061002	Aebtissinwisch	50	57	53	55	58	59	60	59	61	64	64	63	61	55	62	70	71	70	72	66	64	73	64	66	67	72	75	71	73	73
1061003	Agethorst	186	191	196	199	198	214	221	207	206	200	208	205	211	208	202	197	205	202	200	193	185	176	172	167	170	158	150	146	149	153
1061004	Altenmoor	215	231	230	223	228	230	229	228	238	266	278	272	272	273	275	281	275	275	265	259	266	258	253	241	237	219	224	214	208	204
1061005	Auufer	135	141	136	138	143	143	142	148	146	143	141	143	135	132	135	138	139	142	131	135	138	139	135	140	139	140	141	138	137	125
1061006	Bahrenfleth	565	554	556	564	569	565	578	586	576	616	615	608	608	608	606	612	608	614	609	606	601	591	589	573	573	557	552	555	557	562
1061007	Beidenfleth	838	842	846	849	846	841	847	834	850	883	883	862	894	930	926	926	942	933	948	954	980	961	940	936	910	922	942	945	919	916
1061008	Bekdorf	105	101	101	99	99	94	97	101	106	103	96	98	98	95	92	99	101	102	86	81	80	85	83	77	77	70	67	73	76	74
1061010	Bekmünde	150	149	150	158	155	157	161	156	157	168	170	158	142	151	151	159	170	172	172	177	185	186	178	156	168	163	172	186	177	184
1061011	Besdorf	244	242	237	247	236	240	243	239	248	244	258	260	246	242	248	239	233	232	223	218	225	227	223	226	213	194	199	218	242	248
1061012	Blomesche Wildnis	649	648	662	679	682	667	671	673	660	698	706	714	702	709	712	720	698	696	697	642	611	605	616	604	604	610	578	582	563	560
1061013	Bokelrehm	145	143	147	142	143	141	144	150	148	144	136	147	150	147	144	152	153	155	146	145	137	139	132	133	130	126	120	125	119	120
1061014	Bokhorst	140	137	141	150	151	159	157	155	151	135	133	129	130	135	139	139	146	150	153	157	146	143	126	143	141	131	138	130	132	131
1061015	Borsfleth	715	717	730	735	740	744	753	743	767	803	823	817	834	831	838	835	849	856	865	865	865	849	841	847	818	817	807	796	784	782
1061016	Breitenberg	351	343	342	342	327	325	332	335	347	370	369	374	378	388	384	395	407	404	405	393	406	395	390	375	364	340	298	301	303	292
1061017	Breitenburg	1210	1202	1191	1149	1023	934	924	947	942	1020	1031	1038	1067	1076	1075	1059	1060	1071	1067	1041	1049	1070	1095	1116	1106	1107	1087	1086	1123	1136
1061018	Brokdorf	965	974	981	1002	1000	994	1007	1017	1000	999	1011	1034	1051	1061	1054	1052	1076	1070	1067	1046	1044	993	985	966	971	990	972	973	941	938
1061019	Brokstedt	2036	2037	2027	2018	2040	2043	2049	2059	2098	2138	2164	2154	2194	2208	2199	2200	2175	2127	2092	2049	2035	2007	1944	1915	1854	1816	1764	1746	1716	1676
1061020	Büttel	39	42	48	36	38	33	36	38	36	39	45	42	45	47	43	51	47	46	51	48	45	44	45	44	42	46	46	46	40	46
1061021	Christinenthal	70	62	67	71	73	56	61	64	59	51	48	49	49	52	52	57	58	61	58	58	63	67	62	65	69	66	62	58	56	61
1061022	Dägeling	1039	1043	1043	1031	1020	1019	1022	1027	1029	1030	997	995	994	994	1005	984	961	871	876	841	797	781	759	734	725	718	725	721	725	734
1061023	Dammfleth	276	281	287	294	287	284	300	301	297	296	300	303	317	330	335	343	338	348	354	361	364	364	368	359	370	352	367	362	363	371
1061024	Drage	236	233	241	243	248	253	253	259	250	255	245	246	248	258	261	259	255	247	244	249	266	259	259	266	265	274	257	256	262	256
1061025	Ecklak	277	281	304	298	305	304	307	318	327	304	321	332	334	359	374	365	351	364	362	355	342	353	374	371	362	385	361	361	337	337
1061026	Elskop	156	164	151	151	152	154	153	155	155	162	152	153	153	148	153	167	162	168	175	181	175	180	180	182	177	180	179	174	164	173
1061027	Engelbrechtsche Wildnis	883	893	875	893	906	893	911	863	918	925	933	925	940	928	910	893	886	884	894	892	872	828	816	773	762	755	756	743	753	750
1061028	Fitzbek	404	402	411	405	382	370	372	370	364	378	365	373	386	372	379	380	375	382	380	383	390	382	383	388	364	348	359	350	345	347
1061029	Glückstadt, Stadt	10931	11069	11143	11190	11228	11150	11098	11099	11137	11498	11542	11707	11684	11743	11846	12027	12112	12103	12159	12234	12352	12383	12396	12403	12388	12146	12033	11970	11936	11830
1061030	Grevenkop	327	321	315	326	311	308	314	308	320	347	348	351	352	331	349	349	354	353	345	354	351	344	330	314	327	325	327	333	321	328
1061031	Gribbohm	440	448	446	443	458	455	459	440	452	476	457	466	476	488	476	497	495	487	494	493	491	478	462	427	423	395	400	400	418	408
1061033	Hadenfeld	150	146	144	137	132	136	135	142	136	121	120	113	108	114	115	109	109	113	105	112	109	98	107	112	112	110	118	102	94	98
1061034	Heiligenstedten	1487	1508	1538	1557	1534	1555	1557	1578	1558	1635	1649	1638	1649	1674	1684	1687	1690	1656	1643	1676	1647	1607	1522	1347	1341	1290	1243	1220	1200	1191
1061035	Heiligenstedtenerkamp	733	735	731	728	727	736	735	740	727	715	705	709	716	741	736	740	754	756	746	763	752	741	735	723	707	632	600	599	596	589
1061036	Hennstedt	598	587	607	609	606	613	597	595	588	597	602	597	589	608	595	608	610	597	578	601	609	572	589	572	586	581	587	556	539	532
1061037	Herzhorn	1127	1128	1111	1113	1096	1075	1065	1071	1077	1051	1057	1062	1064	1098	1087	1073	1080	1102	1098	1097	1093	1098	1087	1119	1097	1072	1078	1098	1069	1061
1061038	Hingstheide	78	78	80	74	75	71	69	70	77	67	67	71	68	74	77	67	74	66	65	65	68	70	61	64	63	68	70	70	71	68
1061039	Hodorf	199	197	209	208	210	216	222	214	224	215	222	224	232	227	227	233	235	231	229	223	217	210	222	221	217	212	206	199	186	188
1061040	Hohenaspe	1946	1950	1963	2004	2004	2010	2004	2029	2016	2057	2069	2053	2067	2085	2094	2110	2086	2083	2038	1902	1907	1896	1934	1876	1844	1806	1735	1751	1780	1743
1061041	Hohenfelde	877	872	894	900	920	916	916	914	906	897	916	919	940	952	954	964	937	937	915	917	918	912	908	904	868	860	847	842	834	808
1061042	Hohenlockstedt	6111	6145	6160	6232	6159	6123	6085	6084	6084	6012	6051	6125	6175	6224	6275	6269	6272	6321	6275	6202	6083	5966	5902	5938	5888	5812	5756	5696	5727	5700
1061043	Holstenniendorf	397	402	405	427	412	411	414	404	420	421	420	404	415	409	420	428	426	428	434	425	434	433	416	395	388	388	394	403	389	399
1061044	Horst (Holstein)	5731	5709	5659	5626	5583	5515	5462	5413	5324	5224	5235	5187	5257	5185	5176	5155	5113	5043	4942	4904	4754	4607	4563	4545	4601	4548	4507	4447	4438	4464
1061045	Huje	278	271	269	256	261	264	274	269	260	257	255	261	273	262	269	281	293	289	292	281	294	288	279	273	284	271	267	255	249	244
1061046	Itzehoe, Stadt	31803	31879	31848	31896	31771	31094	31035	30956	30964	32368	32583	32732	32800	32982	33137	33277	33230	33429	33442	33549	33710	33926	34308	34245	34344	34227	34082	33867	32915	32817
1061047	Kaaks	441	442	437	431	426	436	430	418	425	407	409	412	433	436	427	417	416	424	419	415	400	407	403	377	372	365	370	378	370	340
1061048	Kaisborstel	72	75	78	78	79	79	79	78	78	76	78	77	78	79	78	84	82	72	74	68	69	74	78	78	76	75	72	75	75	76
1061049	Kellinghusen, Stadt	8133	8142	8059	8020	8092	7763	7761	7794	7810	7846	7893	7806	7934	8070	8034	8068	7949	7978	8003	8008	8062	8074	8093	8102	8066	8099	8099	8103	8011	8063
1061050	Kiebitzreihe	2223	2172	2169	2168	2126	2127	2168	2197	2194	2189	2215	2207	2238	2255	2284	2305	2259	2262	2249	2280	2276	2257	2244	2177	2110	2077	2080	2015	1964	1960
1061052	Kleve	548	560	555	569	560	572	579	571	579	562	571	569	585	606	613	612	623	612	611	602	617	608	584	550	559	564	573	571	559	552
1061053	Kollmoor	33	33	32	33	32	34	35	35	36	32	34	34	32	32	33	35	37	38	38	41	45	45	42	41	42	41	47	45	47	42
1061054	Krempdorf	233	227	224	208	221	235	244	238	245	257	266	259	249	257	253	266	261	269	262	261	269	266	291	285	285	287	289	284	273	268
1061055	Krempe, Stadt	2357	2362	2384	2377	2400	2381	2358	2357	2373	2348	2334	2347	2403	2428	2466	2467	2458	2475	2424	2410	2317	2275	2248	2242	2201	2208	2149	2128	2087	2090
1061056	Kremperheide	2314	2348	2338	2346	2352	2379	2389	2434	2453	2485	2515	2518	2527	2564	2550	2560	2581	2537	2493	2464	2472	2494	2470	2485	2463	2449	2391	2384	2353	2302
1061057	Krempermoor	560	563	560	557	545	550	543	533	528	536	528	549	558	552	533	524	535	518	524	507	503	488	470	442	439	435	436	449	449	448
1061058	Kronsmoor	175	180	172	178	184	187	185	191	186	182	189	191	197	192	190	191	200	202	208	208	215	206	196	197	201	175	184	189	205	196
1061059	Krummendiek	88	92	91	86	78	80	84	79	77	79	80	74	82	81	88	76	73	67	59	59	55	51	50	48	49	50	58	54	54	56
1061060	Kudensee	118	113	123	133	132	138	138	138	140	141	137	148	150	155	161	169	166	166	172	180	175	175	176	171	178	173	164	166	178	187
1061061	Lägerdorf	2643	2662	2706	2699	2635	2575	2604	2587	2596	2544	2543	2598	2636	2661	2697	2789	2801	2812	2812	2841	2897	2908	2989	3014	3002	2984	3024	2987	2959	2991
1061062	Landrecht	117	110	109	116	122	125	128	131	130	141	139	141	151	148	137	137	137	138	138	141	145	139	138	139	133	131	134	129	130	129
1061063	Landscheide	265	268	265	262	269	263	250	246	249	228	245	238	249	243	241	255	249	243	240	234	256	265	255	265	277	276	283	290	272	278
1061064	Lockstedt	140	139	144	147	161	163	160	165	176	173	172	171	173	177	180	181	185	179	179	183	174	159	154	162	161	167	167	162	158	161
1061065	Lohbarbek	741	741	743	696	694	717	715	699	698	731	728	739	742	750	745	754	744	723	708	686	690	689	672	601	572	566	546	520	512	508
1061066	Looft	409	396	394	391	397	375	372	375	379	373	373	387	386	386	380	388	391	390	393	402	397	407	381	384	374	367	341	342	344	338
1061067	Mehlbek	438	421	439	445	450	437	456	455	449	456	445	438	450	439	449	459	467	468	449	451	458	460	418	417	407	409	410	397	406	395
1061068	Moordiek	106	109	109	110	117	122	118	120	116	109	116	123	120	122	125	121	126	127	126	122	118	127	126	126	129	133	136	135	134	133
1061070	Moorhusen	84	81	75	70	83	83	78	84	84	84	88	83	84	87	98	100	92	93	96	97	88	99	98	96	94	91	85	94	91	92
1061071	Mühlenbarbek	274	292	296	297	297	301	301	311	321	327	331	331	335	327	343	349	356	357	355	339	357	340	300	302	310	309	309	303	296	294
1061072	Münsterdorf	1881	1882	1857	1884	1888	1904	1905	1931	1921	1958	1950	1959	1945	1920	1939	1950	1955	1987	2003	2003	2026	2000	2027	2051	2061	1991	1906	1848	1848	1874
1061073	Neuenbrook	695	711	718	689	675	664	664	660	657	653	651	652	676	682	683	692	682	691	697	688	707	717	723	709	683	632	654	609	608	603
1061074	Neuendorf b. Elmshorn	841	839	852	846	857	853	852	868	882	902	907	912	921	916	912	930	915	931	938	931	938	913	903	925	917	917	909	897	891	884
1061076	Nienbüttel	127	125	123	115	118	120	125	131	129	146	149	152	148	148	150	147	141	138	146	148	152	143	139	144	137	148	141	140	141	140
1061077	Nortorf	846	861	870	844	857	876	884	893	893	838	849	854	868	888	874	877	878	880	880	878	853	840	852	844	854	836	795	779	751	767
1061078	Nutteln	252	255	261	257	250	254	256	262	257	277	281	278	289	295	297	293	306	307	311	311	318	310	324	323	327	320	311	308	308	297
1061079	Oelixdorf mit Breitenburg	2739	2746	2741	2709	2584	2482	2422	2417	2414	2689	2704	2721	2735	2753	2794	2801	2765	2746	2766	2767	2838	2893	3021	2981	2931	2927	3446	6838	4819	4282
1061080	Oeschebüttel	174	170	174	168	170	172	175	170	170	188	191	203	204	211	216	214	219	214	211	208	203	205	186	191	187	184	175	168	153	151
1061081	Oldenborstel	119	117	117	120	115	118	120	122	131	117	120	122	117	126	127	131	134	127	126	135	122	127	127	127	126	137	121	121	122	116
1061082	Oldendorf	1088	1090	1097	1107	1107	1112	1140	1123	1112	1154	1134	1175	1199	1214	1188	1168	1188	1166	1178	1156	1136	1132	1119	1115	1080	1064	977	930	916	938
1061083	Ottenbüttel	735	738	748	734	713	723	722	720	750	747	752	748	753	755	744	740	736	726	717	684	641	613	614	623	614	619	603	565	563	561
1061084	Peissen	258	258	261	265	276	272	281	293	301	286	299	305	308	304	325	334	310	311	306	311	301	300	298	288	289	288	295	295	292	284
1061085	Pöschendorf	266	269	264	263	265	267	267	261	266	260	258	256	249	242	232	240	238	217	208	207	214	212	201	195	190	183	195	192	192	186
1061086	Poyenberg	390	395	406	401	396	389	397	387	398	410	404	413	410	425	415	413	410	413	413	403	404	402	398	378	354	338	328	319	326	320
1061087	Puls	569	580	581	589	604	602	586	600	603	601	612	615	601	603	618	628	623	619	606	606	584	577	564	570	554	522	520	495	489	481
1061088	Quarnstedt	458	435	431	436	435	436	442	448	445	417	431	430	437	420	419	417	432	420	420	423	417	411	402	401	399	390	392	378	377	379
1061089	Rade	97	91	93	104	104	102	99	99	103	94	90	90	95	100	103	103	106	115	118	114	104	100	97	102	103	100	101	105	101	98
1061091	Reher	734	732	730	722	727	724	744	763	775	762	750	755	746	774	783	775	795	774	806	802	770	755	760	747	738	739	753	741	733	724
1061092	Rethwisch	564	573	570	592	591	569	592	587	590	591	583	580	587	593	601	619	631	631	627	621	605	554	534	532	532	558	561	566	560	567
1061093	Rosdorf	349	365	375	375	379	374	371	367	366	367	383	380	383	377	383	389	398	395	393	405	402	410	420	376	372	380	385	411	400	390
1061095	Sankt Margarethen	816	820	844	886	875	860	845	890	880	936	928	972	979	986	998	995	1032	993	1014	1037	1021	1018	1030	1077	1062	1059	1078	1062	1044	1057
1061096	Sarlhusen	474	471	450	461	471	473	473	473	481	491	491	494	509	507	495	488	520	512	505	491	490	448	427	413	408	373	373	377	362	359
1061097	Schenefeld	2584	2587	2576	2568	2528	2527	2460	2451	2478	2475	2461	2510	2210	2551	2525	2527	2587	2588	2585	2572	2502	2509	2467	2456	2396	2328	2338	2327	2304	2253
1061098	Schlotfeld	238	241	223	233	221	215	229	222	227	230	234	238	238	235	238	241	243	234	231	255	269	255	245	251	246	253	247	243	245	236
1061100	Silzen	157	151	154	155	150	157	159	153	157	169	178	171	175	181	171	172	172	174	178	164	167	165	162	163	158	146	145	153	154	145
1061101	Sommerland	766	747	759	766	786	769	788	794	812	820	841	861	849	848	868	846	843	838	828	813	822	807	781	757	750	750	763	765	778	756
1061102	Stördorf	122	118	120	123	125	123	128	128	128	126	124	121	120	119	115	129	131	130	130	133	130	128	126	130	131	126	127	126	128	137
1061103	Störkathen	103	107	92	89	93	94	95	99	96	102	106	106	108	100	101	102	100	92	100	101	106	101	104	101	69	86	87	76	78	78
1061104	Süderau	717	744	744	752	742	767	745	740	743	761	762	773	786	783	787	794	775	774	776	790	768	768	789	761	757	786	772	789	777	768
1061105	Vaale	1230	1198	1202	1204	1206	1215	1208	1208	1241	1242	1253	1266	1269	1286	1308	1314	1310	1302	1303	1277	1281	1276	1280	1265	1197	1149	1121	1119	1115	1109
1061106	Vaalermoor	129	133	133	132	137	145	144	156	160	141	145	145	156	151	162	156	154	158	161	156	173	167	178	179	188	187	191	182	191	193
1061107	Wacken	1941	1918	1877	1827	1832	1844	1819	1844	1835	1822	1814	1840	1850	1858	1864	1887	1859	1874	1846	1840	1772	1774	1697	1600	1586	1569	1534	1491	1475	1454
1061108	Warringholz	302	301	304	299	295	298	289	289	293	294	288	300	294	300	302	315	313	308	294	305	307	296	306	306	284	289	268	264	255	250
1061109	Westermoor	396	403	395	384	397	396	391	396	400	393	395	385	375	386	395	402	408	409	406	423	423	424	407	394	388	401	410	404	377	369
1061110	Wewelsfleth	1308	1305	1337	1351	1374	1399	1392	1426	1451	1501	1511	1575	1572	1602	1635	1561	1599	1667	1704	1511	1520	1526	1459	1379	1348	1309	1280	1245	1203	1195
1061111	Wiedenborstel	11	11	11	11	10	11	12	12	12	9	8	5	5	7	5	5	4	4	3	3	2	7	5	3	7	5	5	8	9	7
1061112	Willenscharen	174	178	175	166	174	166	159	154	159	158	154	154	158	146	163	159	166	171	177	175	177	170	174	171	171	170	165	153	136	143
1061113	Wilster, Stadt	4287	4308	4383	4420	4354	4393	4383	4373	4441	4487	4383	4392	4389	4425	4466	4421	4439	4435	4401	4386	4406	4403	4472	4478	4528	4555	4561	4583	4556	4508
1061114	Winseldorf	313	325	327	330	323	324	328	313	319	307	302	306	314	311	328	303	300	291	275	271	276	275	270	263	260	250	261	264	265	261
1061115	Wittenbergen	164	166	165	164	163	160	161	166	164	181	182	167	178	184	184	180	183	195	182	179	181	186	177	172	167	168	168	178	171	168
1061116	Wrist	2359	2363	2396	2434	2438	2453	2383	2413	2422	2429	2435	2504	2514	2510	2518	2470	2493	2479	2464	2435	2420	2413	2405	2427	2414	2365	2389	2341	2276	2296
1061117	Wulfsmoor	387	382	379	388	380	369	376	377	389	387	391	395	382	393	376	372	374	359	363	359	333	313	310	294	294	285	300	287	299	293
1061118	Kollmar	1676	1674	1705	1730	1692	1698	1676	1697	1703	1721	1712	1719	1722	1717	1748	1771	1797	1801	1798	1785	1770	1781	1790	1788	1787	1806	1799	1765	1760	1775
1061119	Neuendorf-Sachsenbande	444	443	462	478	485	470	479	488	485	472	483	478	489	493	511	506	493	495	504	509	523	513	517	499	496	511	528	521	516	515
1062001	Ahrensburg, Stadt	33728	33472	33305	32936	32606	31602	31361	31292	31327	31276	30858	30907	30663	30155	30138	30167	30085	30068	29704	29117	28998	29011	28760	28631	28454	28187	28135	27860	27572	27418
1062003	Badendorf	865	852	837	858	827	794	781	777	781	766	781	799	805	793	794	792	777	775	786	790	768	767	773	739	727	730	739	721	718	730
1062004	Bad Oldesloe, Stadt	24690	24744	24964	25005	24938	24699	24477	24448	24337	24322	24204	24145	24172	24071	24131	24019	23934	23744	23638	23314	23194	23257	23365	23365	23072	22653	22150	21762	21385	21097
1062005	Bargfeld-Stegen	3054	2988	2972	2937	2899	2866	2816	2825	2852	2917	2907	2892	2873	2850	2822	2775	2753	2695	2591	2519	2493	2428	2352	2266	2267	2264	2197	2159	2118	2048
1062006	Bargteheide, Stadt	16077	16109	16045	16135	16029	15863	15788	15528	15281	15227	15136	14882	14651	14417	14052	13855	13729	13820	13793	13680	13426	13034	12740	12609	12279	12264	12230	12213	11968	11719
1062008	Barnitz	863	861	841	849	855	846	837	850	843	828	823	830	831	826	837	835	827	809	805	794	800	788	739	729	679	694	722	726	732	714
1062009	Barsbüttel	12824	12690	12681	12572	12477	12278	12092	12072	11852	12363	12368	12375	12454	12401	12432	12322	12179	12170	12196	12064	11875	11659	11429	10986	10823	10761	10646	10665	10526	10438
1062011	Braak	967	984	990	977	941	966	994	927	923	837	799	783	790	784	782	775	752	749	731	721	713	717	685	681	671	665	654	654	653	628
1062014	Delingsdorf	2246	2191	2116	2182	2180	2186	2174	2167	2165	2181	2167	2191	2203	2183	2092	2008	1858	1709	1595	1363	1166	1183	1161	1113	1117	1102	1084	1115	1077	1052
1062016	Elmenhorst	2710	2709	2716	2662	2537	2508	2486	2525	2509	2494	2494	2486	2425	2336	2274	2261	2231	2218	2171	2171	2171	2143	2106	2085	2057	2013	1934	1904	1880	1876
1062018	Glinde, Stadt	18466	18443	18365	18335	18122	17991	17922	17668	17027	16718	16263	16183	16168	16139	16037	16093	16167	16124	16133	16054	16099	16115	16142	16112	15970	15839	15430	15384	15385	15294
1062019	Grabau	791	802	786	796	782	785	794	785	785	778	792	808	811	791	782	780	797	774	761	756	771	778	776	769	786	737	704	707	687	675
1062020	Grande	706	702	695	690	685	664	654	647	632	672	682	673	661	687	669	651	664	672	633	637	654	640	642	624	655	632	617	615	588	588
1062021	Grönwohld	1498	1502	1464	1431	1420	1399	1380	1364	1343	1357	1348	1331	1343	1354	1331	1316	1313	1315	1294	1313	1294	1324	1293	1273	1249	1256	1275	1234	1215	1192
1062022	Großensee	1787	1767	1781	1771	1738	1714	1662	1651	1653	1740	1737	1727	1756	1724	1735	1712	1672	1660	1671	1663	1655	1638	1602	1542	1551	1491	1463	1502	1505	1485
1062023	Großhansdorf	9366	9292	9377	9428	9319	9318	9336	9269	9236	9148	9070	8980	8945	9000	9033	9036	8998	8987	8994	8887	8738	8713	8651	8735	8741	8776	8758	8922	8824	8746
1062025	Hamberge	1757	1694	1616	1528	1515	1523	1490	1477	1499	1433	1453	1392	1373	1369	1332	1336	1340	1323	1324	1286	1253	1241	1234	1181	1172	1175	1145	1098	1086	1067
1062026	Hamfelde	513	504	504	500	480	499	487	480	473	477	487	488	500	501	535	517	509	506	498	475	476	478	463	434	428	440	416	417	420	420
1062027	Hammoor	1281	1295	1312	1290	1277	1269	1246	1215	1184	1194	1198	1187	1141	1153	1170	1134	1121	1121	1116	1111	1114	1120	1090	1058	1036	994	934	930	934	913
1062031	Heidekamp	460	456	448	434	427	415	425	450	463	448	471	474	466	471	471	494	491	493	476	476	465	370	370	369	377	367	375	361	343	330
1062032	Heilshoop	553	544	541	555	550	544	541	556	577	599	602	600	591	596	594	616	613	629	606	608	620	626	596	589	598	567	551	532	521	526
1062033	Hohenfelde	53	53	50	49	48	58	57	59	53	48	50	51	53	60	61	61	56	53	61	62	64	64	59	55	55	53	58	59	58	61
1062035	Hoisdorf	3569	3594	3493	3499	3491	3480	3476	3463	3506	3373	3390	3418	3427	3478	3503	3471	3467	3474	3485	3444	3385	3361	3341	3316	3324	3229	3136	3072	3068	3042
1062036	Jersbek	1753	1727	1707	1739	1743	1708	1724	1679	1730	1787	1768	1784	1756	1793	1795	1819	1804	1804	1788	1710	1654	1615	1653	1642	1642	1649	1595	1559	1516	1529
1062039	Klein Wesenberg	784	762	753	746	738	725	733	738	743	770	757	781	761	768	773	773	760	749	763	739	744	730	719	689	655	610	601	602	586	592
1062040	Köthel	336	329	335	334	329	324	319	314	328	325	336	341	352	349	376	385	403	398	384	392	363	350	367	370	357	347	329	313	307	299
1062045	Lütjensee	3451	3442	3435	3433	3347	3276	3244	3205	3254	3220	3231	3222	3229	3217	3179	3113	3087	3129	3043	2975	2932	2947	2996	2983	2905	2757	2732	2705	2622	2562
1062046	Meddewade	920	908	917	901	874	865	848	838	785	779	787	775	773	774	788	766	768	780	784	769	762	769	766	748	704	688	688	678	678	672
1062048	Mönkhagen	669	693	661	665	681	645	655	642	652	618	622	623	643	641	670	650	646	659	667	636	602	592	536	554	563	559	531	537	529	523
1062050	Neritz	314	321	327	325	317	306	309	314	315	306	318	328	338	331	334	330	354	362	366	358	350	343	337	341	333	319	323	314	313	316
1062051	Nienwohld	496	485	479	487	472	463	459	464	463	459	467	472	474	487	480	485	472	482	478	465	444	432	420	435	436	433	426	414	396	406
1062053	Oststeinbek	8842	8849	8902	8886	8858	8791	8752	8617	8615	8608	8466	8164	8067	7878	7785	7862	7878	7899	7906	7962	8041	8036	8103	8121	8179	8151	8148	8064	8015	8075
1062056	Pölitz	1228	1220	1213	1195	1180	1175	1149	1144	1165	1192	1171	1183	1180	1175	1195	1192	1199	1236	1206	1175	1165	1171	1144	1093	1103	1095	1080	1060	1043	1047
1062058	Rausdorf	235	228	235	238	232	230	245	226	222	224	231	235	232	230	226	227	232	224	229	235	239	237	233	233	223	224	214	208	201	204
1062059	Rehhorst	700	700	711	725	739	717	698	690	701	682	691	709	714	710	714	708	706	698	705	691	692	693	708	687	653	640	627	621	607	596
1062060	Reinbek, Stadt	27950	27649	27409	27366	27048	26710	26514	26347	26203	25821	25874	25671	25516	25712	25647	25636	25114	24960	24744	24570	24598	24679	24702	24573	24473	24644	24621	24764	24678	24670
1062061	Reinfeld (Holstein), Stadt	9041	9058	9055	9029	8963	8878	8752	8704	8716	8533	8499	8535	8467	8471	8434	8367	8334	8328	8386	8398	8326	8340	8168	8116	8033	7796	7619	7505	7426	7270
1062062	Rethwisch	1199	1186	1189	1144	1127	1118	1114	1099	1087	1043	1045	1043	1094	1086	1077	1079	1091	1078	1098	1087	1062	1032	982	959	980	964	918	909	908	910
1062065	Rümpel	1308	1283	1267	1271	1300	1278	1280	1280	1301	1308	1307	1305	1298	1302	1304	1311	1295	1301	1296	1277	1265	1171	1155	1125	1102	1086	1059	1021	984	958
1062069	Siek	2457	2441	2393	2395	2323	2331	2286	2207	2204	2063	2032	2037	1987	1992	1993	1953	1945	1932	1937	1927	1955	1910	1878	1905	1857	1843	1812	1797	1851	1814
1062071	Stapelfeld	1862	1788	1776	1774	1685	1691	1704	1660	1653	1586	1606	1552	1559	1510	1478	1503	1489	1507	1529	1509	1504	1473	1467	1474	1392	1380	1398	1369	1369	1357
1062076	Tangstedt	6485	6499	6482	6456	6449	6441	6323	6260	6280	6331	6338	6345	6365	6416	6327	6241	6027	6119	6132	6119	6082	5983	5983	5943	5874	5874	5800	5730	5679	5624
1062078	Todendorf	1244	1248	1255	1230	1243	1239	1204	1182	1143	1144	1129	1073	1063	1049	1059	1037	1047	1032	1041	1063	1068	1079	1068	1092	1020	1000	1000	990	936	929
1062081	Tremsbüttel	1966	1965	2002	1976	2020	2010	1995	1968	1925	1918	1866	1875	1862	1867	1868	1853	1790	1689	1671	1707	1686	1641	1628	1581	1554	1533	1501	1487	1486	1488
1062082	Trittau	8900	8896	8832	8834	8725	8628	8373	8200	8035	7802	7679	7661	7593	7618	7640	7665	7625	7562	7446	7473	7483	7415	7309	7259	6963	6731	6753	6642	6542	6421
1062083	Westerau	743	747	754	750	749	755	753	763	773	781	784	778	782	808	813	803	799	801	787	805	816	803	810	806	800	764	747	722	694	698
1062086	Witzhave	1523	1543	1576	1575	1547	1546	1491	1401	1398	1429	1432	1435	1410	1403	1407	1410	1402	1359	1347	1300	1272	1270	1272	1261	1249	1270	1237	1200	1050	1003
1062087	Zarpen	1450	1459	1438	1452	1434	1450	1446	1447	1448	1462	1507	1511	1519	1551	1574	1578	1587	1597	1574	1557	1515	1469	1430	1455	1440	1446	1461	1456	1460	1454
1062088	Brunsbek	1669	1711	1699	1750	1725	1710	1706	1724	1708	1640	1635	1619	1614	1619	1638	1641	1616	1626	1625	1605	1544	1454	1447	1439	1409	1383	1341	1331	1320	1308
1062089	Lasbek	1258	1275	1262	1214	1188	1180	1198	1204	1197	1184	1196	1203	1195	1197	1167	1162	1174	1186	1212	1196	1191	1177	1181	1178	1129	1085	1072	1072	1050	1047
1062090	Ammersbek	9848	9825	9745	9750	9721	9669	9704	9722	9722	9386	9335	9313	9301	9135	9249	9167	9178	9141	9155	9015	8919	8816	8888	8747	8613	8662	8735	8716	8512	8534
1062091	Steinburg	2761	2743	2749	2757	2726	2675	2584	2603	2590	2541	2517	2512	2508	2503	2526	2516	2509	2498	2453	2416	2345	2327	2339	2267	2228	2210	2154	2116	2083	2050
1062092	Travenbrück	1722	1728	1745	1740	1742	1719	1708	1703	1731	1730	1752	1744	1706	1752	1732	1753	1730	1677	1669	1649	1638	1595	1606	1588	1551	1494	1462	1367	1339	1345
1062093	Feldhorst	555	561	573	584	587	589	610	612	592	586	601	602	598	597	602	612	625	621	593	602	582	590	551	536	520	499	503	493	467	452
1062094	Wesenberg	1663	1679	1697	1671	1659	1596	1518	1459	1396	1302	1268	1227	1194	1152	1126	1071	955	942	912	895	872	883	889	862	833	785	740	681	674	647
2000000	Hamburg	1847253	1841179	1830584	1810438	1787408	1762791	1746342	1734272	1718187	1786448	1774224	1772100	1770629	1754182	1743627	1734830	1734083	1728806	1726363	1715392	1704735	1700089	1704731	1707986	1707901	1705872	1702887	1688785	1668757	1652363
3101000	Braunschweig	249406	248292	248023	248667	251364	248502	247227	245798	243829	248867	247400	246012	245810	245467	245273	245872	245076	245392	245516	245816	246322	247241	248944	251320	252544	254130	256267	258347	259127	258833
3102000	Salzgitter	104291	104948	104548	103668	101079	98966	98197	98095	98588	102394	103446	104423	105320	106665	107726	108763	109855	110817	111696	112302	112934	114104	115453	116865	117713	117842	117684	116750	115381	114355
3103000	Wolfsburg	124371	124151	123914	123909	124045	123027	122457	121758	120889	121451	121109	120538	120009	120493	121199	122148	122724	122331	121887	121805	121954	122185	122798	124655	126331	126965	128032	128996	128995	128510
3151001	Adenbüttel	1787	1765	1768	1742	1734	1740	1745	1762	1762	1753	1743	1717	1755	1733	1708	1713	1724	1695	1700	1688	1633	1545	1501	1482	1485	1470	1400	1333	1314	1270
3151002	Barwedel	1020	989	979	1002	1000	1006	1019	1007	1045	1064	1067	1057	1058	1068	1071	1091	1097	1095	1081	1065	1065	1039	1018	996	967	975	976	961	949	955
3151003	Bergfeld	894	878	883	897	886	880	876	889	895	918	938	924	912	919	934	939	968	980	956	927	922	916	872	826	791	778	754	746	729	733
3151004	Bokensdorf	1298	1300	1286	1223	1185	1164	1094	1014	980	940	947	952	924	944	960	949	931	906	861	826	789	751	736	681	678	711	648	626	579	560
3151005	Brome	3278	3285	3272	3325	3209	3181	3201	3234	3196	3294	3281	3323	3403	3398	3420	3370	3352	3278	3268	3232	3204	3146	3095	3108	3092	3125	3148	3114	3028	3009
3151006	Calberlah	5115	5064	5015	4996	4967	5016	4987	5072	5024	5086	5114	5145	5149	5163	5221	5232	5207	5167	5130	5066	4847	4808	4792	4784	4809	4767	4582	4441	4300	4199
3151007	Dedelstorf	1181	1184	1209	1218	1248	1261	1270	1277	1292	1527	1535	1539	1552	1545	1537	1524	1547	1580	1562	1540	1536	1517	1515	1550	1460	1447	1457	1494	1460	1359
3151008	Ehra-Lessien	1903	1923	1852	1738	2291	1636	1593	1625	1645	1630	1649	1613	1609	1620	1609	1635	1602	1591	1595	1524	1524	1538	1541	1544	1487	1476	1441	1356	1270	1255
3151009	Gifhorn	42837	42519	42239	42019	41905	41617	41518	41331	41183	41558	41616	41799	41905	42143	42466	42634	42834	42689	42740	42943	43034	43291	43237	43297	43526	43149	42405	41214	39853	38678
3151010	Groß Oesingen	1919	1902	1864	1891	1871	1900	1913	1905	1898	1901	1915	1949	1938	2002	2032	2020	2000	1983	2006	1979	1926	1944	1929	1850	1786	1743	1692	1604	1569	1536
3151011	Hankensbüttel	4520	4531	4491	4474	4385	4369	4291	4319	4328	4321	4349	4370	4405	4416	4493	4514	4525	4565	4508	4489	4451	4428	4373	4390	4349	4296	4215	4222	4080	3993
3151012	Hillerse	2493	2475	2517	2523	2484	2490	2468	2478	2519	2544	2533	2575	2627	2616	2615	2602	2560	2481	2495	2427	2446	2379	2355	2336	2209	2090	2023	1951	1938	1889
3151013	Isenbüttel	6420	6496	6483	6441	6416	6418	6377	6320	6326	6165	6119	6099	6161	6182	6170	6212	6265	6254	6238	6221	6225	6053	5915	5952	5862	5738	5544	5355	4757	4293
3151014	Jembke	2019	1999	1995	2030	1965	1917	1874	1878	1872	1961	1989	1998	2008	1978	1936	1892	1873	1860	1857	1847	1847	1752	1686	1579	1415	1393	1345	1268	1227	1199
3151015	Leiferde	4388	4376	4391	4395	4322	4315	4339	4298	4329	4337	4368	4407	4449	4409	4335	4320	4238	4119	4118	4100	4054	4025	4011	3935	3905	3778	3764	3505	3419	3268
3151016	Meine	8639	8706	8648	8610	8556	8451	8365	8290	8211	8179	8198	8136	8145	8135	8068	8027	8008	7986	7881	7735	7578	7304	7117	7047	7035	6889	6643	6574	6507	6275
3151017	Meinersen	8140	8151	8248	8157	8127	8092	8167	8209	8240	8271	8256	8327	8351	8410	8415	8464	8392	8349	8247	8176	7834	7740	7354	6946	6609	6245	6112	5922	5707	5550
3151018	Müden (Aller)	5330	5341	5413	5412	5443	5429	5474	5449	5420	5600	5643	5645	5691	5627	5579	5578	5630	5578	5574	5438	5397	5357	5274	5187	5044	4957	4815	4671	4523	4299
3151019	Obernholz	820	854	843	875	889	898	898	892	915	903	908	931	931	931	926	950	941	938	944	978	967	953	966	970	958	955	940	920	930	935
3151020	Osloß	1909	1892	1880	1931	1927	1916	1875	1892	1898	1896	1899	1959	1975	1979	1987	2010	1981	1972	1956	1928	1880	1885	1874	1849	1768	1722	1699	1682	1602	1544
3151021	Parsau	1869	1871	1856	1850	1860	1836	1824	1814	1833	1865	1889	1920	1924	1911	1939	1946	1959	1945	1980	1921	1937	1886	1901	1873	1845	1842	1767	1704	1626	1561
3151022	Ribbesbüttel	2093	2063	2044	2027	2015	2050	2064	2071	2090	2129	2123	2165	2147	2146	2150	2138	2138	2120	2114	2062	2004	1943	1925	1896	1890	1873	1812	1689	1616	1595
3151023	Rötgesbüttel	2372	2329	2323	2288	2241	2243	2251	2231	2233	2294	2317	2345	2297	2292	2286	2256	2190	2164	2124	1943	1923	1810	1745	1610	1501	1503	1465	1507	1424	1412
3151024	Rühen	5798	5725	5587	5479	5488	5355	5103	4968	4862	4890	4884	4859	4886	4866	4804	4611	4433	4415	4390	4431	4418	4397	4382	4317	4093	3998	3819	3732	3478	3286
3151025	Sassenburg	11894	11803	11614	11480	11358	11208	11068	10921	10784	11030	11009	10956	11025	11042	10995	10973	10880	10780	10639	10520	10309	9839	9547	9239	9045	8809	8308	8037	7653	7422
3151026	Schönewörde	917	891	893	936	912	893	891	908	904	919	937	958	945	953	973	980	965	964	956	968	981	949	935	927	925	939	917	880	876	827
3151027	Schwülper	7293	7312	7232	7159	7127	7004	6937	6818	6837	6791	6767	6748	6708	6655	6618	6676	6577	6549	6479	6403	6376	6317	6010	5921	5675	5450	5419	5356	5141	5056
3151028	Sprakensehl	1211	1211	1235	1238	1242	1243	1247	1246	1260	1299	1285	1299	1321	1310	1327	1312	1340	1368	1393	1363	1367	1363	1352	1368	1344	1373	1373	1345	1292	1284
3151029	Steinhorst	1235	1234	1229	1291	1276	1249	1259	1271	1289	1346	1374	1377	1379	1411	1437	1466	1437	1482	1468	1487	1505	1506	1492	1501	1535	1523	1559	1560	1512	1510
3151030	Tappenbeck	1420	1406	1383	1403	1390	1344	1326	1346	1351	1360	1367	1373	1350	1331	1289	1240	1241	1209	1198	1162	1105	980	929	854	788	790	819	796	816	798
3151031	Tiddische	1261	1237	1255	1277	1256	1249	1229	1246	1266	1266	1281	1296	1287	1293	1282	1282	1250	1218	1188	1169	1177	1185	1173	1131	1139	1136	1072	1030	1020	1005
3151032	Tülau	1412	1418	1452	1468	1480	1461	1498	1497	1513	1526	1526	1531	1515	1501	1459	1459	1475	1456	1429	1404	1409	1389	1411	1423	1428	1377	1358	1356	1309	1246
3151033	Ummern	1545	1564	1545	1567	1582	1578	1538	1536	1554	1560	1571	1564	1575	1606	1590	1578	1592	1560	1549	1536	1493	1452	1362	1265	1224	1184	1195	1147	1136	1077
3151034	Vordorf	3115	3081	3043	3032	3023	3042	3032	3066	3082	3224	3263	3268	3313	3333	3346	3377	3326	3343	3351	3290	3271	3137	3131	3085	3027	2928	2701	2619	2458	2373
3151035	Wagenhoff	1171	1170	1196	1209	1181	1170	1163	1152	1135	1133	1152	1158	1173	1181	1184	1158	1149	1148	1125	1118	1082	1051	1050	1048	1016	988	908	920	882	837
3151036	Wahrenholz	3691	3654	3609	3611	3624	3631	3617	3637	3641	3712	3734	3748	3735	3814	3824	3845	3805	3781	3711	3618	3537	3454	3409	3283	3181	2881	2594	2470	2415	2337
3151037	Wasbüttel	1785	1815	1839	1867	1889	1879	1864	1858	1864	1891	1908	1913	1936	1952	1962	1955	1906	1865	1862	1845	1756	1759	1755	1742	1689	1635	1587	1522	1442	1381
3151038	Wesendorf	5378	5287	5265	5222	5213	5093	5105	5058	5024	4949	4935	4950	4935	5017	5013	4947	4907	4891	4829	4847	4763	4688	4639	4614	4552	4271	3967	3683	3434	3296
3151039	Weyhausen	2416	2397	2393	2464	2443	2470	2452	2458	2491	2636	2661	2622	2623	2633	2632	2651	2628	2603	2568	2486	2487	2510	2511	2553	2528	2467	2374	2442	2373	2258
3151040	Wittingen	11421	11503	11529	11589	11480	11501	11410	11489	11640	11734	11848	11980	12084	12124	12233	12291	12404	12383	12387	12381	12408	12397	12446	12447	12633	12549	12394	12308	12035	11906
3151041	Didderse	1316	1319	1327	1334	1311	1302	1299	1294	1310	1336	1348	1354	1387	1382	1410	1399	1341	1332	1317	1302	1241	1244	1242	1223	1222	1140	1025	985	931	906
3153002	Bad Harzburg	21926	21945	22017	21969	21735	21619	21680	21904	21965	21891	22037	22187	22365	22462	22734	22817	22927	22896	23021	23100	23090	23200	23143	23382	23599	23784	24001	24112	23975	23882
3153006	Hahausen	754	771	754	768	792	789	819	801	817	862	885	895	907	922	930	941	949	945	957	973	965	979	972	981	983	975	965	954	936	928
3153007	Langelsheim	11285	11361	11536	11684	11697	11786	11805	11876	11973	12232	12412	12636	12739	12942	13068	13122	13266	13366	13513	13619	13741	13731	13790	13938	13962	13948	13954	14065	13995	13892
3153008	Liebenburg	7793	7879	7942	7976	8059	8147	8274	8400	8465	8777	8887	9009	9133	9288	9431	9562	9581	9673	9660	9693	9744	9673	9697	9739	9803	9698	9613	9656	9649	9655
3153009	Lutter am Barenberge	2302	2310	2313	2362	2357	2381	2398	2417	2449	2297	2307	2344	2374	2422	2409	2430	2444	2467	2499	2529	2531	2513	2543	2579	2541	2557	2570	2600	2620	2612
3153012	Seesen	19240	19340	19472	19314	19296	19337	19386	19564	19739	20280	20530	20795	21132	21349	21724	21902	22080	22265	22431	22499	22518	22536	22546	22489	22574	22667	22636	22514	22323	22128
3153014	Wallmoden	916	913	897	895	897	898	939	946	965	980	1033	1039	1050	1083	1112	1113	1116	1138	1103	1091	1099	1104	1100	1091	1107	1114	1125	1145	1135	1129
3153016	Braunlage	5795	5854	5941	6049	6803	5985	6082	6120	6216	6314	6597	6737	6879	7080	7185	7285	7364	7542	7689	7815	7936	8201	8280	8521	8633	8859	8928	9018	8903	8965
3153017	Goslar	50554	50753	51128	51439	50782	50457	50681	51011	51368	51671	52247	52731	53528	53907	54353	54819	55195	55417	55646	55841	56129	56376	56965	57267	57629	57693	57657	57637	57821	57608
3153018	Clausthal-Zellerfeld	15727	15888	15563	15523	15818	15857	15769	15616	15618	17710	17745	17814	17984	18201	18506	18767	18903	18929	19091	19087	19260	19642	19943	20286	20718	21085	21272	21448	21463	21223
3154001	Bahrdorf	1825	1824	1861	1894	1911	1906	1874	1880	1898	1968	1996	2009	2045	2030	2057	2100	2099	2111	2152	2137	2132	2113	2127	2084	2124	2125	2097	2140	2112	2043
3154002	Beierstedt	352	371	365	376	387	386	400	403	412	422	424	439	458	478	477	490	483	494	479	457	461	454	469	487	468	488	466	464	451	458
3154004	Danndorf	2458	2404	2447	2428	2325	2307	2228	2177	2118	2093	2138	2138	2164	2167	2167	2184	2167	2097	2072	2074	2060	2014	2004	2019	2044	2020	1962	1909	1813	1794
3154005	Frellstedt	797	789	807	802	833	843	824	812	831	827	847	858	893	907	905	891	879	897	915	918	930	959	939	982	1005	1010	1029	1054	1060	1066
3154006	Gevensleben	631	646	633	632	638	651	666	655	665	689	701	719	729	749	748	750	771	798	773	791	796	828	821	840	820	792	785	787	773	787
3154007	Grafhorst	1048	1044	1076	1070	1019	1035	1028	1001	995	998	1000	1023	1047	1069	1074	1053	1038	1030	1020	995	1002	978	983	998	999	1011	1012	1009	998	987
3154008	Grasleben	2391	2369	2391	2408	2470	2437	2441	2462	2467	2457	2470	2472	2517	2570	2609	2611	2635	2603	2611	2601	2630	2613	2578	2537	2490	2506	2532	2485	2417	2420
3154009	Groß Twülpstedt	2610	2639	2629	2653	2630	2591	2606	2573	2575	2597	2651	2660	2677	2712	2742	2751	2730	2731	2725	2735	2733	2721	2673	2634	2655	2654	2647	2652	2641	2629
3154012	Jerxheim	1124	1129	1167	1179	1223	1180	1133	1149	1179	1153	1177	1204	1238	1251	1252	1246	1295	1312	1320	1338	1325	1344	1361	1392	1390	1378	1388	1387	1383	1375
3154013	Königslutter am Elm	15704	15704	15774	15880	15733	15819	15699	15603	15579	15694	15909	16078	16160	16214	16350	16498	16499	16582	16570	16546	16696	16677	16770	16809	16802	16735	16683	16574	16440	16268
3154014	Lehre	12129	12135	12218	12249	11927	11655	11505	11516	11520	11463	11590	11657	11621	11745	11732	11735	11688	11600	11606	11620	11606	11489	11367	11320	11396	11464	11387	11439	10971	10651
3154015	Mariental	888	839	816	841	836	836	842	851	892	1010	1034	1071	1076	1103	1100	1095	1139	1140	1211	1275	1134	1162	1222	1258	1398	1430	1501	1532	1489	1259
3154016	Querenhorst	478	482	483	474	492	505	512	519	525	528	546	546	545	566	579	573	570	563	547	541	549	549	525	524	515	512	506	512	486	478
3154017	Räbke	702	682	701	715	683	669	666	677	678	689	692	684	694	695	704	701	682	685	707	644	636	644	664	672	670	658	661	656	636	639
3154018	Rennau	687	697	682	701	688	699	705	696	684	724	712	712	711	729	723	736	733	735	722	724	732	717	702	695	678	687	692	690	676	659
3154019	Schöningen	11212	11306	11412	11405	11430	11327	11385	11377	11542	12048	12270	12428	12560	12719	12970	13220	13415	13570	13808	14037	14237	14314	14494	14620	14767	15022	15086	15156	15065	15052
3154021	Süpplingen	1716	1698	1743	1734	1672	1651	1652	1683	1701	1700	1720	1748	1794	1789	1854	1873	1888	1920	1919	1944	1996	1993	2048	2066	2103	2085	2087	2100	2069	2000
3154022	Süpplingenburg	641	642	654	645	654	642	648	650	651	658	670	674	682	684	682	680	708	694	713	719	718	726	727	717	712	691	682	672	684	693
3154024	Velpke	4854	4803	4652	4651	4710	4627	4568	4584	4596	4613	4612	4620	4638	4693	4649	4593	4522	4539	4477	4474	4475	4411	4253	4159	4163	4123	4101	4094	4055	4031
3154025	Warberg	821	808	818	853	865	880	882	882	885	872	886	906	929	943	923	936	951	925	931	941	942	924	947	936	934	926	932	928	934	945
3154026	Wolsdorf	911	938	940	928	927	931	967	989	995	1052	1072	1075	1098	1100	1122	1137	1128	1149	1152	1161	1201	1210	1179	1147	1124	1165	1141	1133	1133	1132
3154027	Söllingen	1606	1630	1648	1689	1708	1716	1728	1765	1805	1842	1819	1816	1827	1853	1869	1883	1920	1937	1952	1955	1970	1979	1974	2007	2040	2052	2083	2084	2072	2090
3154028	Helmstedt	25712	25728	25803	25872	25739	25615	25464	25487	25726	26739	26967	27333	27768	28206	28461	28734	28792	29028	29145	29406	29673	29878	30073	30334	30532	30403	30312	30522	30755	30728
3155001	Bad Gandersheim	9623	9823	9866	9858	10141	9785	9946	9963	9998	10313	10469	10572	10725	10814	10940	11026	11126	11154	11273	11336	11377	11374	11480	11600	11555	11616	11580	11465	11300	11407
3155002	Bodenfelde	3039	3047	3100	3111	3176	3158	3232	3284	3304	3361	3404	3453	3517	3525	3569	3594	3633	3679	3707	3760	3777	3820	3871	3927	3934	3957	3948	3989	3961	3947
3155003	Dassel	9569	9604	9659	9860	10223	9860	9884	10025	10151	10201	10392	10610	10800	10914	11053	11234	11347	11409	11537	11673	11728	11809	11785	11786	11779	11826	11885	11766	11792	11786
3155005	Hardegsen	7612	7587	7625	7694	7815	7807	7817	7867	7891	8161	8222	8293	8461	8560	8628	8691	8613	8606	8562	8574	8628	8593	8494	8380	8314	8227	8111	8003	7950	7886
3155006	Kalefeld	6231	6270	6354	6451	6543	6586	6585	6636	6692	6844	6928	7025	7015	7114	7246	7285	7326	7390	7414	7449	7496	7512	7430	7420	7460	7490	7548	7382	7367	7334
3155007	Katlenburg-Lindau	6975	7005	7052	7099	7166	7169	7225	7257	7267	7307	7345	7404	7474	7494	7504	7529	7546	7512	7537	7681	7647	7625	7584	7536	7551	7567	7559	7551	7527	7488
3155009	Moringen	6955	6956	6969	6970	7071	6979	7045	7142	7233	7135	7187	7308	7379	7406	7470	7496	7554	7596	7602	7598	7497	7474	7436	7365	7369	7358	7356	7235	7205	7101
3155010	Nörten-Hardenberg	8379	8304	8178	8180	8109	8056	8102	8132	8196	8255	8359	8343	8408	8484	8506	8558	8563	8614	8560	8579	8584	8581	8609	8654	8621	8652	8639	8663	8603	8569
3155011	Northeim	29098	29107	29040	28966	28920	28833	28865	28843	29087	29431	29657	29980	30294	30617	30744	30973	31033	31183	31432	31691	31804	31902	32196	32468	32712	32476	32102	31993	31612	31381
3155012	Uslar	14115	14236	14278	14345	14394	14318	14369	14518	14676	14686	14876	15100	15413	15648	15847	15905	16039	16130	16210	16284	16447	16441	16828	16987	17109	17236	17380	16846	16671	16576
3155013	Einbeck	30689	30826	30925	31076	31338	31354	31591	31751	32021	33366	33714	34233	34558	34912	35183	35481	35671	36072	36266	36487	36860	36980	37275	37487	37782	37795	37850	37796	37581	37269
3157001	Edemissen	12435	12437	12322	12360	12349	12320	12281	12329	12350	12334	12395	12473	12602	12676	12658	12672	12695	12580	12466	12311	12269	12107	11866	11705	11563	11346	11243	11048	10788	10650
3157002	Hohenhameln	9286	9201	9174	9154	9116	9047	9067	9038	9049	9310	9350	9415	9504	9667	9741	9792	9827	9841	9719	9731	9715	9690	9503	9401	9220	9133	9006	8866	8737	8612
3157005	Lengede	13356	13265	13051	13070	12900	12749	12650	12723	12684	12862	12921	13006	13079	13062	13119	13030	12911	12831	12435	12104	11968	11719	11444	11197	11005	10870	10752	10609	10445	10374
3157006	Peine	49990	49952	49901	49676	49366	48553	48377	48414	48480	48743	49038	49188	49516	49770	49884	49810	49767	49583	49499	49494	49354	49201	49256	49285	49024	48507	48105	47784	47225	46654
3157007	Vechelde	17584	17247	17071	16925	16738	16426	16264	16014	16026	16094	16086	16074	16138	16141	16230	16231	16197	16178	16189	16095	15866	15450	15094	15030	15005	15023	15049	14977	14727	14585
3157008	Wendeburg	10412	10307	10319	10280	10234	10198	10114	10067	9962	10095	10074	10048	10063	10127	10136	10019	9944	9745	9600	9515	9215	9044	8945	8836	8705	8487	8254	8151	7986	7891
3157009	Ilsede	21738	21556	21530	21514	21617	21308	21394	21462	21614	22043	22202	22409	22658	22735	22813	22938	23015	23076	23090	22993	22904	22791	22556	22448	22258	22389	22179	22123	21813	21675
3158002	Baddeckenstedt	3073	3069	3055	3060	3069	3015	3036	3056	3067	2901	2965	2979	3034	3108	3145	3173	3158	3042	2980	2990	2984	2933	2953	2932	2946	2968	2948	2952	2932	2945
3158004	Burgdorf	2223	2248	2261	2243	2294	2299	2340	2362	2403	2306	2355	2369	2412	2439	2470	2446	2471	2500	2550	2529	2540	2547	2500	2436	2478	2473	2439	2386	2374	2359
3158005	Cramme	849	858	874	891	906	904	916	915	943	950	968	985	983	979	994	952	963	967	948	944	936	941	927	915	890	872	876	898	875	874
3158006	Cremlingen	13073	13111	13053	13065	13056	13047	13000	12909	12899	12744	12816	12763	12739	12789	12787	12795	12718	12630	12508	12258	11961	11779	11623	11499	11366	11473	11443	11354	11276	11199
3158007	Dahlum	634	640	649	651	656	670	678	694	696	739	741	736	739	751	775	780	778	781	799	770	771	780	788	765	772	772	776	763	742	746
3158008	Denkte	2795	2823	2819	2874	2981	2982	3002	3025	3026	3053	3063	3077	3087	3127	3149	3119	3131	3120	3156	3151	3122	3080	2976	2795	2598	2444	2259	2210	2218	2218
3158009	Dettum	1151	1153	1200	1227	1231	1170	1166	1163	1158	1184	1232	1250	1267	1302	1331	1323	1345	1331	1361	1386	1375	1364	1380	1381	1443	1418	1392	1390	1373	1343
3158010	Dorstadt	692	705	704	698	693	680	692	700	676	674	693	681	699	724	708	730	697	691	692	692	698	706	698	702	684	658	672	681	685	687
3158011	Elbe	1521	1520	1514	1540	1558	1552	1571	1587	1598	1675	1698	1709	1738	1774	1836	1831	1842	1831	1847	1847	1872	1909	1919	1947	1938	1923	1912	1931	1909	1898
3158012	Erkerode	890	909	928	923	931	945	953	980	968	1003	994	1028	1044	1053	1062	1056	1032	992	973	979	948	947	934	923	944	941	914	928	908	899
3158013	Evessen	1236	1267	1273	1285	1292	1307	1295	1275	1279	1326	1323	1338	1359	1363	1369	1380	1396	1370	1378	1404	1389	1366	1353	1325	1297	1270	1242	1234	1229	1162
3158014	Flöthe	1101	1102	1119	1120	1120	1135	1134	1143	1170	1177	1180	1172	1202	1219	1237	1244	1231	1226	1221	1160	1122	1091	1082	1058	1003	996	980	980	980	1001
3158016	Haverlah	1610	1634	1636	1624	1605	1609	1645	1628	1611	1587	1590	1627	1645	1666	1704	1743	1752	1763	1716	1748	1707	1714	1688	1630	1532	1499	1517	1529	1521	1485
3158017	Hedeper	492	496	489	499	504	523	511	505	515	543	544	552	571	579	597	586	584	580	590	602	608	614	606	627	638	658	677	667	664	650
3158018	Heere	1078	1112	1115	1114	1127	1127	1122	1198	1209	1168	1182	1178	1216	1205	1208	1229	1223	1225	1218	1198	1174	1169	1170	1127	1100	1105	1112	1103	1103	1085
3158019	Heiningen	652	653	653	665	657	670	666	663	678	664	671	662	686	716	745	759	750	751	757	739	719	680	653	622	612	616	619	624	624	633
3158021	Kissenbrück	1725	1756	1742	1766	1779	1768	1762	1743	1767	1784	1808	1825	1853	1855	1873	1863	1843	1798	1737	1703	1592	1536	1447	1388	1310	1257	1171	1118	1085	1098
3158022	Kneitlingen	806	807	818	832	828	823	820	832	841	847	850	846	858	853	874	885	874	898	902	894	876	814	837	840	853	848	853	828	817	842
3158023	Ohrum	626	634	624	629	634	610	611	619	613	572	565	575	579	597	619	638	639	647	660	687	700	704	687	686	666	657	641	641	626	635
3158025	Roklum	437	433	435	443	444	461	449	446	461	464	463	469	471	488	493	508	524	538	537	538	539	541	551	541	558	581	568	576	586	577
3158027	Schöppenstedt	5477	5474	5559	5561	5606	5410	5374	5392	5445	5360	5457	5530	5688	5758	5831	5888	5995	6031	6102	6032	6039	6100	6125	6171	6068	5949	5931	5922	5892	5775
3158028	Sehlde	890	878	910	918	921	916	909	918	929	929	936	943	985	998	1011	1051	1062	1082	1082	1092	1081	1040	1027	1068	1034	1021	1019	1015	1006	999
3158030	Sickte	6118	6163	6219	6225	6172	6068	6004	5943	5899	5759	5788	5759	5719	5730	5727	5757	5752	5750	5723	5688	5584	5440	5330	5152	5080	4956	4849	4803	4728	4663
3158031	Uehrde	890	886	890	897	908	915	937	937	922	956	980	998	1039	1044	1061	1056	1065	1090	1096	1116	1086	1122	1105	1135	1109	1119	1110	1136	1140	1140
3158032	Vahlberg	695	716	728	744	752	739	740	755	773	774	788	807	818	821	836	836	860	865	880	886	907	929	926	901	910	934	928	882	891	909
3158033	Veltheim (Ohe)	985	977	959	980	992	994	991	983	978	1054	1055	1068	1067	1067	1061	1065	1058	1072	1071	1048	1042	1019	1014	998	945	910	868	848	832	823
3158035	Winnigstedt	701	686	690	706	733	726	715	729	735	766	775	798	837	860	864	902	924	936	928	933	964	996	975	998	1045	1079	1096	1071	1035	971
3158036	Wittmar	1114	1110	1131	1158	1159	1156	1168	1168	1200	1239	1230	1251	1291	1309	1343	1362	1368	1345	1307	1311	1295	1286	1231	1247	1215	1219	1213	1165	1135	1135
3158037	Wolfenbüttel	52165	52174	52357	52446	52269	51670	51569	51546	51581	53427	53460	53797	53954	54124	54461	54730	54687	54643	54517	54690	54344	53968	53760	53602	53686	53622	53812	53226	52490	52032
3158038	Börßum	2784	2805	2835	2872	2856	2795	2810	2846	2857	2838	2883	2947	2965	2972	3035	3081	3108	3106	3093	3074	3034	3024	3002	3005	2983	2976	3001	3009	2981	2997
3158039	Schladen-Werla	8744	8752	8803	8811	8789	8898	8869	8978	9016	9096	9225	9391	9501	9525	9595	9680	9667	9756	9777	9847	9880	9801	9821	9701	9722	9695	9644	9744	9716	9644
3158040	Remlingen-Semmenstedt	2395	2409	2395	2437	2459	2451	2445	2479	2512	2481	2528	2553	2606	2617	2659	2686	2723	2702	2736	2761	2708	2569	2494	2457	2445	2458	2469	2516	2491	2464
3159001	Adelebsen	6245	6294	6344	6370	6573	6499	6513	6541	6563	6496	6544	6626	6738	6784	6905	6958	7026	7086	7079	7067	7092	7191	7257	7196	7184	7162	7113	7044	6965	6990
3159002	Bad Grund (Harz)	8238	8344	8425	8522	8638	8666	8749	8851	8957	8904	9023	9119	9217	9342	9496	9617	9613	9671	9712	9780	9913	9968	10096	10250	10341	10318	10301	10333	10318	10360
3159003	Bad Lauterberg im Harz	10265	10269	10404	10548	10596	10506	10671	10813	10919	11124	11257	11434	11557	11630	11717	11803	11902	12023	12079	12169	12291	12420	12572	12692	12901	13022	13122	13255	13221	13318
3159004	Bad Sachsa	7372	7346	7377	7476	7510	7431	7392	7545	7619	7679	7745	7830	7969	8027	8117	8221	8289	8335	8424	8515	8651	8666	8766	8833	8804	8823	8841	8886	8778	8693
3159005	Bilshausen	2190	2222	2215	2206	2217	2268	2298	2317	2348	2355	2392	2400	2405	2375	2414	2443	2431	2434	2487	2470	2440	2440	2428	2440	2444	2444	2506	2417	2422	2399
3159006	Bodensee	791	792	790	815	821	821	824	829	835	780	778	788	808	818	819	802	803	808	781	772	739	750	720	710	724	672	666	681	649	634
3159007	Bovenden	13651	13586	13559	13568	13510	13403	13255	13166	13255	13350	13395	13529	13631	13651	13728	13735	13683	13406	13351	13363	13300	13234	13136	13247	13336	13409	13489	13405	13353	13326
3159008	Bühren	524	525	541	536	528	528	532	557	567	527	530	536	533	541	553	560	553	555	552	550	549	549	550	563	549	540	559	544	544	553
3159009	Dransfeld	4438	4367	4344	4327	4345	4380	4310	4328	4293	4057	4116	4156	4146	4150	4231	4265	4344	4267	4309	4336	4343	4351	4312	4261	4208	4209	4214	4168	4090	4061
3159010	Duderstadt	20363	20466	20517	20677	21072	20702	20860	21040	21209	21722	21833	22114	22383	22687	22808	22833	22941	22976	23056	23156	23284	23285	23335	23356	23393	23409	23312	23230	23159	23021
3159011	Ebergötzen	1942	1971	1952	1940	1918	1909	1888	1911	1945	1788	1811	1824	1840	1856	1868	1915	1925	1965	1948	1964	1963	1989	1980	1949	1932	1936	1940	1969	1919	1851
3159012	Elbingerode	444	447	442	459	437	447	464	470	486	426	440	450	464	486	487	500	490	489	485	489	471	467	462	465	452	445	447	454	460	462
3159013	Friedland	13016	13300	12607	11210	12506	9198	8008	7655	7529	11029	11151	10726	10853	10250	9717	10708	10415	10264	10249	10214	9971	9347	9930	9992	9039	8404	6933	7067	8821	7926
3159014	Gieboldehausen	3988	4041	4103	4107	4132	4113	4090	4109	4140	3936	4002	4037	4085	4105	4139	4131	4114	4108	4134	4144	4100	4098	4073	4073	4072	3947	3679	3578	3478	3373
3159015	Gleichen	8831	8804	8845	8894	8984	9029	9010	9063	9145	9264	9314	9411	9515	9537	9621	9679	9563	9591	9487	9405	9288	9162	9080	9030	9020	9057	9034	9052	8960	8958
3159016	Göttingen	118911	119801	119529	119177	118914	117665	116891	116650	116052	121060	121457	121455	121513	121581	121884	122187	122883	123698	123822	124132	124775	125984	127366	126451	126253	127519	128419	128299	124331	121831
3159017	Hann. Münden	23609	23805	23853	23797	24072	23711	23668	23738	23785	24525	24505	24612	24830	24930	25126	25173	25310	25567	25545	25657	25810	25837	26062	26190	26405	26463	26283	26261	25988	25762
3159018	Hattorf am Harz	4004	3992	4050	4066	4074	4089	4092	4125	4175	4234	4287	4341	4391	4388	4421	4408	4475	4495	4505	4504	4472	4405	4407	4390	4362	4351	4312	4331	4370	4305
3159019	Herzberg am Harz	12837	12889	13028	13051	13059	13079	13140	13227	13367	13802	14016	14209	14406	14532	14697	14872	15029	15113	15261	15374	15568	15699	15880	16181	16325	16409	16586	16567	16673	16638
3159020	Hörden am Harz	944	965	981	993	991	994	1001	1038	1049	1087	1107	1160	1138	1146	1138	1156	1154	1174	1169	1166	1147	1148	1144	1143	1124	1125	1115	1103	1089	1090
3159021	Jühnde	989	1003	985	997	1018	1021	1040	1023	1021	1097	1087	1089	1096	1090	1072	1083	1086	1086	1080	1084	1068	1069	1089	1111	1095	1082	1047	1031	1024	1010
3159022	Krebeck	1033	1046	1047	1061	1077	1071	1074	1086	1088	1126	1124	1141	1177	1177	1158	1145	1156	1178	1176	1139	1154	1169	1150	1141	1142	1136	1113	1083	1064	1045
3159023	Landolfshausen	1041	1045	1036	1045	1040	1050	1077	1084	1087	1158	1188	1192	1214	1224	1246	1224	1212	1237	1233	1234	1221	1259	1230	1219	1204	1204	1196	1181	1176	1165
3159024	Niemetal	1500	1502	1493	1512	1499	1485	1511	1495	1524	1631	1645	1656	1693	1714	1713	1717	1710	1688	1693	1646	1639	1618	1550	1533	1525	1510	1496	1484	1492	1456
3159025	Obernfeld	925	963	945	944	951	958	962	954	961	987	973	976	1011	990	1022	1001	1025	1028	1042	1027	1027	1001	997	1006	981	961	934	939	951	961
3159026	Osterode am Harz	21563	21731	21839	21985	22201	22130	22317	22532	22868	23444	23675	23993	24209	24474	24643	24845	25054	25300	25571	25848	26024	26294	26489	26451	26707	26695	26981	27143	27163	27097
3159027	Rhumspringe	1771	1788	1819	1808	1822	1833	1836	1869	1884	1939	1972	1988	1998	2019	2064	2059	2057	2064	2095	2130	2134	2109	2078	2081	2074	2069	2027	2032	2042	2053
3159028	Rollshausen	853	835	843	846	827	829	835	846	864	930	927	931	916	934	959	976	985	983	1012	1020	993	1002	996	1001	976	990	1026	1030	1026	1025
3159029	Rosdorf	11883	11949	11887	11762	11909	11806	11736	11671	11721	12061	11980	12050	12051	11990	11862	11805	11774	11709	11685	11648	11588	11461	11415	11350	11180	10929	10873	10773	10650	10467
3159030	Rüdershausen	799	811	799	821	847	854	862	841	871	877	894	914	910	925	952	959	976	956	956	984	999	997	978	990	995	977	1012	1010	1028	1046
3159031	Scheden	1887	1906	1948	1982	1926	1911	1894	1926	1915	2007	2021	2047	2051	2077	2133	2133	2134	2136	2157	2114	2087	2073	2065	2110	2156	2131	2093	2070	2055	2054
3159032	Seeburg	1579	1572	1613	1598	1585	1594	1618	1610	1620	1591	1586	1580	1593	1629	1630	1627	1635	1621	1583	1571	1565	1578	1573	1569	1560	1441	1432	1416	1355	1325
3159033	Seulingen	1346	1323	1344	1347	1337	1340	1350	1378	1377	1380	1414	1436	1473	1453	1454	1455	1469	1466	1454	1458	1453	1400	1411	1393	1387	1381	1346	1295	1294	1291
3159034	Staufenberg	7749	7801	7835	7855	7800	7861	7910	7889	7998	8086	8157	8188	8290	8356	8427	8472	8504	8512	8492	8533	8626	8739	8699	8650	8689	8660	8653	8654	8646	8593
3159035	Waake	1263	1280	1284	1271	1282	1284	1315	1314	1313	1398	1406	1395	1411	1418	1450	1439	1431	1433	1476	1476	1512	1532	1514	1525	1514	1517	1498	1496	1472	1443
3159036	Walkenried	4297	4370	4460	4481	4537	4579	4656	4732	4804	4684	4740	4849	4936	5006	5137	5206	5270	5326	5469	5556	5635	5690	5755	5836	5884	5886	5811	5825	5764	5778
3159037	Wollbrandshausen	640	636	638	629	622	635	613	640	652	625	619	627	632	661	652	652	659	657	653	645	659	665	700	678	688	704	713	711	696	673
3159038	Wollershausen	511	492	499	544	519	462	469	458	463	473	460	478	464	476	484	475	481	473	471	457	440	431	425	418	425	434	426	434	443	452
3159039	Wulften am Harz	1809	1795	1816	1838	1842	1872	1885	1912	1928	1944	1963	1970	2013	2042	2063	2078	2099	2071	2075	2050	2020	1987	1960	1968	1962	1942	1958	1930	1963	1959
3241001	Hannover	536925	538068	535061	532864	532163	523642	518386	514137	509485	522686	520966	519619	518069	516343	515729	515841	516160	517310	516415	515001	514718	516157	520670	522574	523147	525763	524823	523627	517476	513010
3241002	Barsinghausen	34187	34234	33989	33922	33608	33310	33231	33090	33062	33618	33667	33961	34084	34213	34166	34253	34376	34370	34408	34497	34648	34743	34715	34695	34643	34522	34514	34101	33660	33391
3241003	Burgdorf, Han	30727	30699	30482	30320	30147	29676	29397	29094	28863	29886	29951	30063	30002	29990	30074	30304	30218	30225	30204	30314	30387	30405	30451	30417	30275	30114	29731	29427	29213	29022
3241004	Burgwedel	20234	20369	20474	20594	20654	20307	20239	20333	20301	20487	20432	20481	20517	20446	20384	20473	20359	20113	19861	19885	19633	19503	19406	19273	19166	18993	19004	18735	18516	18314
3241005	Garbsen	61032	60754	60875	60853	60590	59957	59912	59674	59516	61790	61818	62000	62554	62942	63123	63208	63309	63278	63271	63269	63148	63336	63146	62813	62681	62079	62196	62204	61182	60776
3241006	Gehrden, Han	14962	14864	14903	14845	14624	14550	14418	14356	14211	14502	14588	14611	14661	14638	14850	14906	14895	14836	14630	14730	14667	14707	14744	14655	14395	13997	13835	13334	12903	12705
3241007	Hemmingen, Han	18974	18998	18923	18872	18793	18668	18485	18445	18434	18644	18606	18502	18540	18572	18647	18596	18458	18447	18196	17940	17714	17294	16914	16878	16608	16413	16302	16243	16063	16133
3241008	Isernhagen	24315	24409	24219	24001	23792	23331	23090	22937	22742	22927	22882	22846	22933	22753	22619	22670	22538	22478	22496	22309	22188	22001	21986	21973	21979	22149	22157	22029	21782	21485
3241009	Laatzen	41606	41422	41449	41389	40939	39922	39526	39328	39090	40254	40273	40109	40131	40031	40075	40021	39725	39405	38965	38402	38278	37905	37691	37388	37180	37058	37366	37866	37445	37242
3241010	Langenhagen, Han	54652	54244	53790	53514	53323	52330	51847	51533	51045	52583	51982	51691	51672	51388	50883	50516	50051	49652	49506	49432	49334	49167	49814	49449	48921	48500	47609	47691	47428	47432
3241011	Lehrte	44030	43999	43932	43720	43639	43189	43048	42668	42668	43259	43339	43518	43624	43713	43888	44045	44088	44285	44200	43872	43500	42888	42818	42546	42011	41704	41538	41415	40846	40350
3241012	Neustadt am Rübenberge	44386	44282	43964	43902	43931	43499	43378	43324	43516	45049	45237	45375	45485	45657	45734	45711	45677	45423	45343	45026	44704	44566	44089	43640	43299	42730	41821	41394	40560	39532
3241013	Pattensen	14542	14636	14630	14447	14324	14161	13908	13834	13750	13885	13946	13944	13946	13882	13872	13850	13658	13435	13337	13064	12986	12883	12990	12965	13011	13070	13035	13027	12967	12985
3241014	Ronnenberg	24393	24347	24080	24050	23752	23625	23539	23339	23241	23239	23109	23286	23204	23249	23223	23186	23345	23284	23134	23200	23189	23064	23242	22955	22663	22573	22500	22219	21715	21025
3241015	Seelze	34401	34442	34036	33763	33283	32755	32397	32206	31940	32782	32683	32729	33000	33076	33167	33206	33022	33167	33160	33192	33040	33024	33027	32943	32702	32530	32423	32120	31493	30974
3241016	Sehnde	23384	23389	23505	23584	23489	23157	23181	23060	23021	22944	22862	22819	22830	22688	22607	22198	21902	21543	21123	20759	20241	19787	19351	18939	18622	18248	18248	17983	17774	17614
3241017	Springe	29013	28951	28918	28807	28682	28378	28336	28389	28473	29301	29356	29421	29566	29656	29833	29823	29929	30039	29907	29897	29997	29891	29830	29842	29875	29830	29965	30108	29890	29752
3241018	Uetze	20276	20280	20260	20180	20103	19902	19894	19820	19880	20145	20247	20265	20313	20336	20413	20348	20242	20060	19854	19742	19526	19156	19102	18846	18711	18620	18575	18378	18021	17619
3241019	Wedemark	29582	29647	29599	29457	29358	28957	28745	28579	28356	29063	29108	29069	29197	29291	29174	29054	28801	28798	28567	28373	27890	27341	26846	26581	26107	25933	25803	25486	25042	24758
3241020	Wennigsen (Deister)	14017	13996	14054	14138	14036	13902	13933	13901	13955	14072	14076	14156	14125	14134	14168	14145	14065	13993	13919	13713	13405	13328	13189	13092	13013	13037	12979	13070	13092	13033
3241021	Wunstorf	41477	41594	41532	41478	41251	40819	40636	40628	40670	41014	41134	41332	41586	41774	41914	41982	41906	41737	41542	41474	41056	40848	40715	40528	40084	39731	39488	39183	38664	38276
3251001	Affinghausen	843	859	856	842	832	827	836	833	843	835	864	867	871	890	907	929	941	955	977	938	947	985	946	924	941	965	947	917	872	849
3251002	Asendorf	2975	2943	3067	3147	2925	3048	3133	3101	3140	3088	3194	3073	3251	3154	3302	3266	3282	3223	3268	3023	3078	3055	3129	3108	3061	3017	3011	2867	2719	2684
3251003	Bahrenborstel	1105	1096	1098	1122	1134	1133	1134	1081	1095	1181	1215	1230	1242	1262	1263	1255	1250	1247	1260	1276	1276	1253	1242	1252	1252	1241	1227	1226	1222	1204
3251004	Barenburg	1239	1234	1226	1246	1242	1240	1249	1256	1259	1243	1245	1268	1246	1264	1295	1305	1308	1340	1328	1325	1319	1320	1311	1274	1262	1271	1260	1214	1222	1197
3251005	Barnstorf	6465	6381	6292	6305	6292	6135	6076	6029	6059	5846	5888	5913	5920	5964	5999	6008	6027	6005	6003	5970	5957	6017	5938	5899	5869	5837	5816	5695	5644	5601
3251006	Barver	1080	1062	1108	1070	1049	1017	1028	1015	1025	1038	1045	1055	1061	1065	1096	1104	1096	1113	1123	1105	1098	1125	1125	1131	1139	1154	1183	1146	1169	1166
3251007	Bassum	15964	15955	15818	15737	15768	15634	15529	15442	15520	15870	15899	16125	16176	16259	16243	16227	16172	16155	16132	16058	15913	15643	15432	15198	15055	14979	14734	14294	14125	13999
3251008	Borstel	1220	1205	1223	1255	1249	1240	1245	1259	1278	1351	1360	1390	1370	1378	1440	1379	1407	1387	1420	1398	1355	1352	1378	1314	1372	1302	1250	1242	1242	1254
3251009	Brockum	1047	1045	1012	1025	1021	1012	1027	1022	1022	1072	1057	1071	1070	1087	1076	1083	1099	1089	1069	1083	1084	1094	1085	1093	1074	1051	1036	1030	1009	1005
3251011	Dickel	472	468	465	465	462	463	470	477	474	498	508	503	518	517	519	532	539	558	551	549	540	560	569	571	576	584	593	568	546	546
3251012	Diepholz	16974	16882	16661	16521	16692	16169	15914	15981	15917	16614	16541	16553	16618	16611	16593	16561	16662	16542	16378	16290	16209	16284	16321	16278	16121	16080	15919	15726	15243	14970
3251013	Drebber	2931	2878	2932	2968	2971	2905	2876	2845	2854	2920	2913	2940	2938	2944	2969	2986	2983	2972	2939	2931	2921	2963	2885	2889	2869	2890	2864	2901	2867	2859
3251014	Drentwede	983	1001	994	1013	994	1014	1006	1037	996	1017	1038	1055	1058	1053	1048	1055	1047	1044	1051	1039	1039	1031	1025	1032	1036	1073	1082	1070	1071	1056
3251015	Ehrenburg	1475	1500	1506	1495	1510	1499	1532	1547	1544	1572	1553	1584	1621	1652	1664	1691	1701	1716	1719	1730	1747	1759	1752	1757	1754	1760	1731	1734	1685	1679
3251017	Eydelstedt	1801	1814	1803	1821	1759	1758	1779	1794	1782	1831	1834	1856	1880	1908	1909	1918	1933	1921	1947	1921	1931	1914	1946	1953	1933	1884	1904	1901	1932	1916
3251018	Freistatt	473	480	476	569	632	619	591	568	565	1012	1021	1023	994	993	924	937	883	861	815	791	751	785	798	812	813	805	790	780	776	762
3251019	Hemsloh	540	541	575	590	563	539	546	544	561	589	615	631	638	649	639	612	625	621	623	607	607	635	633	642	630	639	622	613	620	622
3251020	Hüde	1220	1223	1153	1145	1131	1082	1059	1071	1063	1095	1081	1063	1043	1053	1066	1064	1051	1032	1029	1006	1007	1010	998	978	970	941	895	919	880	881
3251021	Kirchdorf	2238	2189	2262	2155	2145	2035	2061	1920	1947	2023	2015	2044	2047	2060	2051	2062	2037	2045	2021	2008	2022	2013	2016	1962	1908	1889	1954	1915	1922	1889
3251022	Lembruch	1196	1195	1197	1151	1148	1091	1099	1142	1133	1087	1076	1060	1082	1001	1012	1006	997	998	1023	1007	1027	1035	1054	1072	1035	964	966	950	902	901
3251023	Lemförde	3333	3288	3223	3131	3105	3011	2992	2967	2977	2878	2875	2861	2876	2868	2887	2883	2870	2805	2745	2733	2675	2649	2659	2679	2583	2527	2452	2367	2372	2306
3251024	Maasen	435	437	442	467	469	472	480	494	486	517	529	522	528	542	547	536	545	546	555	561	549	547	552	559	551	552	524	521	505	505
3251025	Marl	720	716	706	728	718	698	700	704	703	565	494	506	559	556	569	571	585	602	645	651	684	692	732	748	741	754	781	779	760	742
3251026	Martfeld	2801	2783	2824	2844	2793	2670	2738	2698	2764	2854	2852	2848	2887	2970	2988	2958	2947	2852	2901	2739	2739	2678	2605	2578	2600	2518	2488	2369	2273	2268
3251027	Mellinghausen	1040	1053	1092	1080	1075	1056	1039	1046	1055	1066	1099	1074	1081	1082	1089	1095	1098	1106	1111	1116	1111	1101	1099	1086	1053	1054	1066	1077	1067	1055
3251028	Neuenkirchen	1206	1222	1218	1198	1163	1152	1167	1183	1217	1187	1179	1155	1177	1174	1170	1162	1120	1126	1106	1073	1087	1072	1029	988	951	890	907	884	853	814
3251029	Quernheim	466	454	452	430	424	441	416	416	408	443	433	447	448	456	456	458	448	469	470	473	475	461	448	439	436	419	396	402	397	398
3251030	Rehden	2256	2221	2153	2124	2055	1942	1877	1878	1850	1766	1755	1757	1775	1812	1838	1804	1782	1774	1757	1730	1714	1660	1662	1608	1573	1553	1543	1536	1519	1556
3251031	Scholen	752	772	786	774	808	811	799	803	804	810	845	848	855	833	860	864	853	849	846	834	823	815	820	810	809	810	796	803	810	826
3251032	Schwaförden	1490	1491	1467	1516	1523	1500	1513	1526	1536	1452	1433	1415	1453	1506	1503	1497	1504	1515	1530	1536	1502	1491	1498	1548	1548	1552	1521	1525	1547	1528
3251033	Schwarme	2553	2544	2568	2532	2509	2501	2495	2476	2480	2441	2451	2508	2500	2513	2485	2504	2461	2446	2400	2355	2234	2128	2088	2051	2035	1983	1958	1957	1936	1913
3251034	Siedenburg	1265	1276	1294	1281	1278	1263	1243	1264	1291	1244	1266	1246	1280	1287	1300	1313	1329	1309	1322	1293	1323	1317	1289	1277	1259	1258	1273	1198	1182	1165
3251035	Staffhorst	499	511	510	530	533	543	534	534	542	581	577	605	597	600	591	594	585	592	595	591	583	592	586	580	589	593	595	594	597	596
3251036	Stemshorn	685	688	671	682	664	667	676	681	661	700	702	703	722	724	734	728	734	729	734	703	721	701	685	656	648	637	659	646	623	593
3251037	Stuhr	33611	33678	33526	33374	33083	32729	32556	32576	32576	33344	33151	33200	33100	32931	32734	32504	32219	31933	31323	30799	30273	29544	29284	29013	28733	28318	28294	28054	27671	27457
3251038	Sudwalde	1034	1054	1062	1082	1056	1060	1051	1047	1060	1061	1051	1061	1078	1074	1097	1123	1129	1100	1064	1092	1112	1098	1093	1094	1072	1032	1002	995	979	994
3251040	Sulingen	12778	12842	12799	12755	12681	12569	12568	12549	12457	12599	12716	12793	12840	12862	12887	12856	12788	12742	12679	12590	12594	12525	12491	12651	12543	12351	12131	11877	11642	11366
3251041	Syke	24295	24355	24346	24298	24018	23734	23666	23669	23583	24341	24401	24425	24527	24584	24443	24233	24027	23786	23657	23565	23555	23374	23340	23238	23014	22732	22038	21411	20578	19674
3251042	Twistringen	12367	12449	12302	12257	12219	12083	12151	12166	12197	12414	12430	12417	12496	12505	12541	12544	12581	12518	12459	12291	12271	12247	12238	12209	12034	11875	11626	11547	11455	11324
3251043	Varrel	1514	1538	1530	1517	1504	1364	1349	1266	1287	1337	1348	1365	1386	1390	1370	1366	1387	1407	1419	1430	1426	1427	1456	1420	1439	1439	1438	1482	1451	1440
3251044	Wagenfeld	7225	7218	7226	7100	7102	7029	6848	6790	6992	6903	6846	6893	6981	7050	7128	7161	7217	7305	7307	7315	7327	7440	7483	7549	7543	7452	7436	7381	7303	7253
3251045	Wehrbleck	753	774	783	782	787	731	746	755	758	759	764	778	766	793	836	882	895	890	903	867	851	879	868	860	840	840	854	840	784	784
3251046	Wetschen	1836	1832	1788	1744	1758	1682	1701	1731	1696	1740	1757	1759	1775	1777	1772	1794	1759	1733	1718	1709	1663	1544	1489	1393	1351	1339	1296	1319	1294	1284
3251047	Weyhe	30816	30669	30627	30534	30388	30291	30047	30056	29896	30362	30376	30316	30392	30325	30283	30325	30245	30294	30311	30240	30017	29592	29091	28666	28453	28188	27975	27382	26733	26050
3251049	Bruchhausen-Vilsen	9118	9070	9051	9121	8809	8909	8926	8869	8887	8689	8746	8878	8867	8903	8861	8933	8873	9147	8906	8829	8725	8710	8636	8542	8451	8273	8026	7772	7713	7570
3252001	Aerzen	10524	10510	10556	10617	10693	10665	10617	10755	10874	11239	11347	11436	11522	11703	11794	11853	11901	12003	12056	12198	12297	12223	12247	12205	12057	11876	11757	11598	11223	11050
3252002	Bad Münder a. D.	17445	17465	17356	17384	17376	17378	17325	17415	17595	17530	17668	17912	18115	18277	18490	18627	18769	18813	18877	19144	19194	19159	19287	19250	19274	19345	19530	19705	19293	18977
3252003	Bad Pyrmont	19130	19090	19067	19154	19239	19088	18909	19008	19085	20770	20861	20920	21219	21355	21492	21586	21788	21964	22100	22067	22210	22465	22733	23145	23180	23051	22768	22729	22432	22012
3252004	Coppenbrügge	7040	6994	6998	7094	7152	7186	7232	7271	7349	7415	7546	7632	7705	7836	7927	7987	7958	8016	8027	8052	8173	8124	8023	8048	8025	7953	7902	7902	7831	7758
3252005	Emmerthal	9728	9710	9847	9882	9876	9877	9970	10066	10109	10552	10702	10822	10910	10957	11127	11174	11238	11241	11358	11385	11386	11242	11231	11261	11175	11004	11019	10922	10931	10936
3252006	Hameln	57434	57510	57228	56747	56529	56310	56260	56281	56433	57771	57906	58267	58563	58517	58739	58676	58902	59156	59052	58807	58544	58762	58973	58762	58781	58923	59209	59294	58906	58539
3252007	Hessisch Oldendorf	18112	18130	18083	18170	18119	18033	18114	18267	18458	18927	19112	19312	19547	19612	19771	19973	20025	19923	19969	20078	20108	20099	20132	20081	20125	19855	19577	19546	18913	18088
3252008	Salzhemmendorf	9136	9150	9161	9217	9297	9276	9328	9469	9610	9881	10022	10097	10286	10401	10500	10593	10678	10755	10851	10932	10979	11029	11097	11079	11181	11208	11182	11103	10995	10943
3254002	Alfeld (Leine)	18535	18626	18814	19061	19081	18913	18974	19138	19253	20146	20340	20460	20622	20960	21061	21197	21433	21600	21778	21968	22122	22241	22307	22371	22413	22548	22566	22599	22542	22448
3254003	Algermissen	7918	7874	7864	7840	7738	7778	7798	7900	7971	7908	8030	8067	8165	8222	8286	8319	8288	8297	8241	8047	7859	7672	7623	7451	7336	7235	6992	6757	6769	6758
3254005	Bad Salzdetfurth	13139	13145	13177	13281	13269	13287	13214	13229	13334	13616	13773	13832	14040	14208	14336	14425	14437	14527	14528	14479	14475	14462	14352	14309	14188	13986	14026	14011	14034	13959
3254008	Bockenem	9855	9795	9827	9741	9659	9731	9801	9926	10106	10557	10702	10861	10919	11027	11187	11250	11262	11349	11375	11400	11474	11484	11445	11512	11631	11667	11658	11477	11423	11316
3254011	Diekholzen	6399	6439	6476	6521	6493	6535	6550	6614	6687	6736	6732	6699	6760	6801	6891	6878	6953	6966	6969	7021	7046	7123	7155	7181	7169	7107	6953	6890	6497	6202
3254013	Eime	2553	2578	2584	2607	2617	2610	2631	2636	2712	2754	2786	2831	2845	2868	2899	2896	2900	2928	2928	2922	2960	2948	2947	2961	2882	2812	2808	2809	2820	2790
3254014	Elze	8989	8939	8858	8853	8767	8824	8838	8852	8921	8986	9087	9238	9400	9463	9543	9519	9629	9677	9623	9641	9683	9646	9637	9775	9737	9712	9729	9693	9561	9463
3254017	Giesen	9696	9709	9698	9804	9707	9670	9678	9694	9758	9794	9814	9909	9933	10025	10022	10023	9941	9974	9888	9830	9776	9640	9472	9331	9146	8794	8708	8718	8670	8517
3254020	Harsum	11379	11359	11367	11428	11445	11466	11533	11614	11681	11751	11862	12002	12058	12140	12227	12257	12237	12143	12075	11909	11707	11596	11482	11245	11117	10924	10788	10679	10504	10391
3254021	Hildesheim	101693	101990	101744	101687	101667	99979	99390	99224	99267	102794	102903	103288	103593	103249	102575	102937	103245	103448	103717	103909	104013	104866	105405	106098	106101	106095	106303	106450	105674	105291
3254022	Holle	6936	7010	7073	7144	7124	7088	7131	7198	7228	7327	7401	7396	7442	7508	7502	7393	7288	7227	7109	7085	7014	6869	6783	6751	6715	6721	6629	6581	6498	6388
3254026	Nordstemmen	12027	12123	12105	12119	12143	12005	12042	12158	12160	12553	12639	12708	12847	13029	13107	13221	13206	13266	13306	13286	13194	13091	12784	12604	12536	12298	12102	12174	12122	12012
3254028	Sarstedt	19391	19359	19262	19261	19303	18626	18541	18353	18204	18518	18551	18591	18577	18589	18575	18536	18477	18237	18080	17894	17677	17820	17834	17848	17873	17847	17785	17743	17552	17326
3254029	Schellerten	7901	7968	8014	8025	8024	7994	8057	8138	8174	8206	8307	8439	8496	8529	8611	8659	8697	8701	8783	8823	8695	8555	8592	8651	8644	8509	8477	8429	8337	8362
3254032	Söhlde	7762	7814	7801	7752	7796	7812	7839	7823	7887	7914	8022	8117	8209	8315	8307	8354	8399	8438	8373	8369	8308	8274	8229	8202	8256	8270	8231	8217	8109	8050
3254041	Duingen	4892	4906	4981	5088	4989	5028	5080	5161	5267	5339	5410	5481	5558	5618	5667	5650	5650	5668	5660	5677	5718	5753	5698	5752	5812	5776	5808	5758	5745	5715
3254042	Freden (Leine)	4682	4731	4709	4758	4727	4794	4792	4821	4853	4817	4863	4986	5144	5221	5310	5406	5443	5520	5499	5626	5681	5675	5761	5820	5813	5830	5801	5796	5744	5657
3254043	Gronau (Leine)	10736	10858	10868	10936	10733	10852	10918	11025	11114	11266	11399	11556	11630	11773	11818	11823	11954	11938	12025	11980	12107	12092	12076	12035	12036	12013	11921	11928	11777	11622
3254044	Lamspringe	5592	5627	5638	5694	5626	5702	5707	5801	5813	5820	5873	6023	6125	6197	6279	6365	6406	6438	6460	6491	6494	6498	6539	6541	6602	6602	6612	6576	6580	6547
3254045	Sibbesse	5742	5744	5829	5857	5900	5988	6066	6082	6144	6212	6209	6294	6330	6419	6476	6490	6556	6625	6664	6584	6583	6523	6544	6548	6508	6487	6452	6391	6390	6365
3255001	Arholzen	400	406	413	407	415	387	397	401	398	408	407	416	427	423	440	445	431	446	464	456	475	463	472	458	443	439	462	470	471	478
3255002	Bevern	3839	3879	3871	3910	3864	3920	3917	3972	4017	3999	3988	4107	4185	4216	4272	4361	4359	4355	4378	4390	4379	4476	4492	4571	4537	4558	4544	4561	4505	4494
3255003	Bodenwerder	5573	5561	5562	5547	5597	5634	5621	5707	5701	5582	5646	5762	5784	5950	6078	6124	6247	6308	6294	6337	6368	6404	6454	6450	6317	6201	6163	6128	6107	6129
3255004	Boffzen	2718	2760	2737	2739	2756	2727	2767	2787	2854	2777	2801	2819	2894	2917	2956	3002	2994	3048	3126	3171	3141	3168	3164	3193	3190	3130	3145	3127	3133	3116
3255005	Brevörde	595	629	630	632	631	630	655	671	692	725	727	757	749	759	762	771	793	796	796	823	832	843	850	851	868	876	896	875	853	873
3255007	Deensen	1342	1336	1381	1382	1388	1425	1416	1442	1467	1517	1529	1553	1558	1575	1586	1598	1604	1639	1651	1647	1628	1658	1671	1693	1713	1696	1710	1727	1714	1689
3255008	Delligsen	7762	7832	7844	7897	8048	7868	7958	8052	8139	8243	8371	8460	8616	8665	8760	8915	9043	9101	9178	9212	9225	9284	9320	9375	9383	9267	9371	9358	9348	9288
3255009	Derental	586	583	583	580	583	593	612	607	621	691	697	721	727	731	734	747	755	761	750	751	759	767	781	764	775	768	748	751	738	721
3255010	Dielmissen	765	758	768	786	775	796	788	803	829	832	834	837	851	841	825	829	859	852	840	858	890	887	888	899	931	917	925	960	946	929
3255012	Eimen	837	872	866	873	889	914	932	952	971	1001	1013	1023	1051	1078	1097	1110	1123	1085	1125	1127	1126	1144	1150	1144	1123	1132	1130	1086	1114	1103
3255013	Eschershausen	3464	3490	3474	3469	3649	3398	3438	3460	3507	3457	3509	3594	3631	3669	3757	3835	3895	4000	4081	4086	4116	4183	4237	4260	4299	4346	4388	4394	4361	4320
3255014	Fürstenberg	1014	1014	1060	1071	1099	1078	1099	1100	1138	1198	1206	1195	1215	1236	1273	1292	1328	1333	1324	1326	1342	1331	1360	1338	1313	1331	1340	1318	1298	1317
3255015	Golmbach	904	914	930	947	934	944	973	988	1010	962	985	1016	1020	1022	1038	1033	1052	1062	1051	1060	1069	1072	1091	1077	1076	1100	1113	1121	1102	1129
3255016	Halle	1508	1487	1513	1528	1519	1541	1569	1572	1597	1641	1657	1683	1689	1702	1724	1782	1822	1866	1881	1858	1864	1881	1847	1854	1835	1873	1938	1883	1831	1763
3255017	Hehlen	1852	1839	1813	1855	1834	1831	1881	1875	1899	1962	2006	2040	2099	2095	2142	2173	2176	2159	2162	2172	2167	2193	2210	2250	2230	2223	2232	2226	2237	2215
3255018	Heinade	849	857	856	878	896	921	915	905	920	945	970	982	980	974	1009	1031	1038	1052	1087	1085	1097	1121	1113	1112	1095	1100	1087	1076	1057	1061
3255019	Heinsen	765	767	772	780	794	800	817	831	835	877	880	911	932	951	963	978	990	978	988	1007	1000	1025	1031	1039	1042	1024	1054	1021	978	962
3255020	Heyen	458	446	438	468	443	436	452	468	472	480	486	483	495	520	534	532	546	540	555	550	556	563	573	558	592	618	619	606	579	576
3255021	Holenberg	405	399	406	423	401	400	413	416	432	454	473	475	493	490	503	505	499	502	496	479	492	508	492	494	511	485	498	484	486	490
3255022	Holzen	527	532	531	552	558	568	595	619	626	640	656	667	665	673	667	695	697	725	711	721	724	743	730	741	726	768	775	766	731	741
3255023	Holzminden	19841	19998	20132	20189	20099	20169	20107	20131	20151	20073	20210	20387	20510	20667	20789	20866	21103	21215	21320	21495	21699	21824	21956	22020	22078	22242	22132	22011	21718	21477
3255025	Kirchbrak	983	981	994	980	999	1006	1037	1051	1069	1132	1149	1153	1155	1158	1161	1163	1181	1186	1194	1191	1216	1216	1217	1233	1262	1260	1267	1261	1233	1229
3255026	Lauenförde	2350	2398	2416	2438	2451	2397	2427	2444	2504	2513	2517	2529	2608	2623	2684	2670	2676	2683	2708	2686	2700	2752	2720	2691	2711	2751	2737	2761	2763	2743
3255027	Lenne	643	649	647	650	648	653	665	675	667	685	705	703	719	720	739	721	764	776	748	782	771	791	841	858	854	864	871	862	824	810
3255028	Lüerdissen	398	408	407	404	405	417	405	416	438	440	468	465	486	497	491	486	518	511	500	498	521	520	563	568	562	603	614	600	583	570
3255030	Negenborn	685	688	675	682	680	685	703	700	710	691	692	703	726	749	783	762	790	789	815	814	804	766	785	779	765	779	768	768	762	781
3255031	Ottenstein	1170	1187	1149	1146	1143	1159	1166	1185	1190	1207	1233	1251	1261	1266	1276	1278	1308	1320	1332	1357	1359	1367	1372	1401	1373	1362	1354	1370	1365	1310
3255032	Pegestorf	374	377	380	383	381	404	388	385	405	431	438	455	474	481	502	510	512	524	533	530	543	538	555	538	576	573	576	568	573	575
3255033	Polle	1184	1203	1183	1168	1193	1180	1176	1184	1203	1099	1125	1138	1135	1182	1201	1214	1231	1267	1285	1290	1279	1289	1317	1317	1364	1288	1263	1276	1265	1268
3255034	Stadtoldendorf	5697	5757	5758	5760	5603	5554	5601	5638	5664	5479	5599	5663	5806	5855	5957	6043	6152	6224	6266	6360	6473	6435	6463	6462	6457	6325	6263	6091	5984	5956
3255035	Vahlbruch	415	392	384	401	419	421	409	417	424	465	471	492	506	536	555	545	545	548	529	549	554	568	576	595	601	628	637	623	607	595
3255036	Wangelnstedt	555	576	571	585	565	582	578	605	605	634	646	652	656	667	660	667	684	687	698	721	701	713	717	734	739	736	736	724	720	713
3256001	Balge	1718	1700	1742	1749	1780	1792	1800	1821	1834	1780	1796	1824	1839	1859	1863	1868	1857	1874	1879	1902	1886	1894	1874	1831	1817	1766	1768	1762	1734	1724
3256002	Binnen	1011	1010	1025	1001	1010	1005	995	1008	1002	1016	1019	1028	1056	1067	1063	1065	1053	1055	1043	1034	1008	982	998	978	952	986	950	946	943	920
3256003	Bücken	2101	2101	2121	2142	2139	2124	2120	2157	2160	2161	2154	2187	2207	2241	2242	2244	2262	2287	2282	2267	2263	2257	2286	2298	2310	2250	2156	2138	2138	2182
3256004	Diepenau	3893	3862	4382	4217	4318	4332	4239	4288	4250	4209	4216	4096	4247	4186	4215	4294	4057	4081	4102	4095	4063	4086	4102	4050	4016	3945	3918	3857	3836	3807
3256005	Drakenburg	1760	1742	1756	1752	1734	1688	1701	1713	1695	1769	1732	1734	1753	1724	1762	1720	1726	1740	1730	1723	1724	1764	1732	1703	1714	1683	1676	1631	1619	1583
3256006	Estorf	1711	1701	1690	1696	1649	1665	1649	1671	1693	1790	1736	1783	1796	1807	1787	1799	1826	1822	1823	1872	1903	1886	1789	1819	1808	1745	1727	1668	1676	1672
3256007	Eystrup	3390	3364	3315	3305	3251	3298	3284	3354	3371	3301	3305	3315	3366	3408	3412	3396	3365	3336	3290	3242	3135	3069	3036	3066	3106	3074	3074	3039	2947	2896
3256008	Gandesbergen	480	471	469	478	478	472	480	490	495	452	457	477	468	466	490	485	479	480	497	478	462	447	439	434	438	422	464	460	440	445
3256009	Hämelhausen	589	587	580	596	571	579	563	564	571	575	582	571	580	603	608	589	600	592	573	570	568	574	583	591	574	561	540	546	545	535
3256010	Hassel (Weser)	1764	1775	1791	1805	1856	1816	1803	1784	1786	1879	1860	1870	1852	1834	1850	1889	1903	1873	1835	1810	1808	1789	1811	1797	1820	1831	1728	1719	1679	1651
3256011	Haßbergen	1571	1603	1569	1571	1559	1553	1585	1603	1597	1557	1547	1548	1542	1528	1536	1563	1572	1581	1602	1562	1553	1513	1493	1471	1439	1367	1314	1291	1286	1258
3256012	Heemsen	1729	1712	1727	1736	1706	1798	1743	1716	1725	1711	1699	1735	1760	1736	1757	1773	1727	1770	1700	1723	1733	1712	1640	1585	1587	1587	1602	1526	1443	1422
3256013	Hilgermissen	2158	2161	2186	2181	2181	2155	2124	2148	2135	2102	2134	2157	2200	2214	2205	2208	2227	2247	2237	2238	2210	2203	2182	2162	2130	2104	2091	2081	2030	2020
3256014	Hoya	3898	3865	3865	3880	3772	3794	3791	3740	3798	3714	3728	3780	3811	3833	3856	3886	3921	3883	3903	3914	3929	3945	3949	3925	3986	3975	3973	3944	3847	3803
3256015	Hoyerhagen	980	942	955	964	953	952	974	1001	1017	1075	1078	1063	1071	1055	1051	1041	1011	1022	1007	992	960	928	913	902	905	913	926	909	873	876
3256016	Husum	2341	2363	2364	2342	2297	2298	2334	2311	2333	2105	2107	2133	2220	2280	2295	2269	2242	2230	2167	2179	2187	2121	2013	2011	1995	1952	1936	1929	1938	1942
3256017	Landesbergen	2717	2714	2717	2719	2689	2680	2706	2747	2763	2980	2961	2965	3100	3048	3103	3087	3146	3115	3059	3038	3030	2867	2755	2772	2758	2759	2703	2690	2674	2623
3256018	Leese	1672	1691	1666	1685	1672	1655	1641	1650	1645	1726	1732	1745	1775	1802	1819	1806	1822	1832	1862	1861	1844	1834	1795	1784	1798	1836	1830	1760	1727	1705
3256019	Liebenau	3844	3877	3797	3801	3688	3562	3574	3525	3518	3777	3802	3838	3871	3867	3911	4004	4041	4074	4145	4119	4144	4182	4355	4406	4654	4631	4565	4420	4512	4672
3256020	Linsburg	955	954	949	928	922	912	925	910	923	938	947	964	1002	1003	998	1010	1008	1025	1028	1031	1034	995	978	985	1003	991	955	974	958	931
3256021	Marklohe	4607	4577	4515	4453	4454	4425	4445	4478	4486	4430	4436	4461	4455	4491	4459	4452	4461	4488	4487	4400	4439	4303	4195	4199	4277	4201	4222	4132	4106	4021
3256022	Nienburg (Weser)	31448	31550	31602	31354	31193	30691	30677	30570	30815	31924	32152	32542	32710	32764	32736	32691	32543	32462	32454	32611	32659	32789	32837	32942	32688	32146	31657	31444	31081	30710
3256023	Pennigsehl	1227	1262	1254	1247	1252	1258	1268	1272	1289	1313	1346	1349	1343	1322	1317	1345	1353	1342	1343	1309	1307	1264	1257	1249	1234	1233	1240	1214	1214	1202
3256024	Raddestorf	1816	1845	1883	1862	1910	1906	1977	1949	1986	2010	2060	2086	2077	2088	2091	2111	2125	2159	2168	2151	2128	2143	2124	2152	2124	2133	2110	2075	2051	2039
3256025	Rehburg-Loccum	10161	10110	10187	10219	10154	10075	10144	10151	10163	10384	10446	10526	10618	10830	10937	10968	10973	11054	11075	11022	11026	10918	10849	10678	10602	10488	10463	10334	10193	10244
3256026	Rodewald	2537	2538	2545	2522	2496	2541	2549	2579	2555	2623	2626	2610	2627	2636	2687	2720	2740	2733	2731	2743	2709	2688	2620	2577	2588	2576	2499	2438	2334	2288
3256027	Rohrsen	1003	1020	1014	1025	1020	991	1009	1014	1039	1044	1052	1053	1059	1073	1086	1080	1077	1074	1064	1034	966	901	886	869	882	902	857	850	854	840
3256028	Schweringen	788	781	786	794	800	819	809	794	797	805	846	848	846	854	850	861	886	861	865	886	856	856	849	837	811	817	820	818	795	798
3256029	Steimbke	2499	2458	2480	2483	2466	2419	2392	2587	2455	2450	2450	2453	2479	2494	2490	2517	2510	2515	2493	2492	2446	2434	2398	2369	2359	2386	2342	2273	2280	2265
3256030	Steyerberg	5191	5194	5236	5254	5262	5206	5200	5219	5303	5271	5331	5321	5387	5356	5347	5361	5378	5388	5355	5333	5358	5396	5452	5495	5551	5448	5381	5277	5207	5123
3256031	Stöckse	1248	1262	1265	1276	1302	1293	1307	1342	1343	1370	1383	1380	1395	1411	1429	1421	1418	1436	1435	1425	1418	1397	1410	1404	1411	1425	1395	1386	1384	1407
3256032	Stolzenau	7468	7475	7521	7522	7360	7428	7463	7484	7491	7382	7405	7484	7552	7527	7511	7525	7587	7658	7681	7695	7690	7714	7616	7360	6886	6569	6409	6293	6123	5988
3256033	Uchte	4999	4956	5861	5607	5768	5566	5500	5639	5680	5751	5634	5376	5718	5514	5698	5697	5653	5721	5642	5814	5641	5430	5463	5355	4979	5019	4967	4815	4779	4742
3256034	Warmsen	3255	3245	3303	3286	3290	3346	3345	3362	3414	3472	3481	3499	3527	3572	3574	3558	3595	3590	3549	3563	3592	3560	3540	3530	3509	3512	3469	3462	3478	3484
3256035	Warpe	724	719	726	733	756	753	756	777	794	804	792	799	796	798	791	805	795	779	776	782	793	756	755	741	736	720	740	762	769	769
3256036	Wietzen	2137	2199	2212	2232	2177	2171	2168	2158	2175	2143	2160	2177	2185	2178	2187	2214	2219	2225	2258	2281	2272	2251	2252	2217	2225	2171	2129	2090	2092	2056
3257001	Ahnsen	1018	1028	1036	1050	1045	1068	1090	1079	1101	1160	1164	1145	1178	1176	1163	1186	1208	1183	1191	1162	1155	1165	1153	1150	1131	1131	1111	1091	1090	1117
3257002	Apelern	2415	2432	2435	2497	2470	2485	2493	2492	2497	2542	2587	2624	2651	2658	2690	2744	2690	2707	2667	2625	2652	2617	2619	2577	2587	2526	2413	2394	2425	2404
3257003	Auetal	6202	6250	6287	6292	6315	6336	6327	6381	6454	6274	6306	6317	6373	6394	6531	6543	6551	6549	6530	6545	6584	6491	6560	6527	6476	6429	6414	6286	6243	6208
3257004	Auhagen	1227	1237	1249	1264	1274	1267	1282	1294	1288	1280	1303	1341	1318	1323	1320	1354	1333	1345	1354	1374	1390	1385	1393	1367	1354	1359	1316	1272	1246	1216
3257005	Bad Eilsen	2563	2579	2598	2533	2480	2421	2394	2360	2387	2196	2252	2254	2189	2254	2292	2291	2347	2408	2386	2353	2340	2272	2254	2239	2277	2257	2217	2171	2079	2104
3257006	Bad Nenndorf	11226	11144	10968	10840	10649	10537	10408	10334	10153	10510	10460	10470	10453	10401	10296	10280	10237	10219	10135	10062	10054	10042	10074	10038	9788	9795	9803	9765	9503	9423
3257007	Beckedorf	1456	1438	1453	1436	1442	1454	1439	1461	1474	1533	1539	1562	1593	1577	1594	1596	1587	1622	1573	1552	1512	1512	1511	1513	1510	1517	1533	1537	1555	1565
3257008	Buchholz	761	753	750	751	724	748	752	752	768	756	748	783	734	758	769	783	777	802	808	817	819	814	792	806	779	745	733	730	732	729
3257009	Bückeburg	19330	19245	19324	19381	19182	18984	18930	18977	19193	20491	20534	20674	20790	20836	20922	20883	20786	20882	20782	20629	20756	20750	20754	20919	20953	21014	21084	20862	20342	20103
3257010	Hagenburg	4569	4547	4556	4514	4494	4526	4507	4508	4528	4486	4522	4502	4549	4547	4559	4598	4585	4601	4489	4497	4370	4115	3878	3869	3874	3876	3893	3881	3862	3793
3257011	Haste	2706	2704	2724	2772	2749	2761	2730	2760	2791	2786	2772	2793	2740	2671	2656	2696	2689	2581	2572	2582	2590	2563	2537	2509	2484	2448	2450	2449	2425	2383
3257012	Heeßen	1422	1420	1385	1373	1385	1395	1379	1391	1397	1513	1536	1554	1587	1593	1593	1578	1566	1556	1564	1548	1561	1570	1593	1569	1558	1517	1460	1474	1450	1397
3257013	Helpsen	1921	1929	1932	1920	1944	1944	1965	1948	1941	2005	2010	2047	2036	2051	2022	2013	2014	2023	2042	2066	2072	2022	2019	2050	1973	1873	1841	1850	1822	1820
3257014	Hespe	2055	2057	2060	2052	2058	2059	2088	2104	2142	2119	2151	2142	2164	2157	2183	2182	2184	2180	2149	2086	1989	1981	1870	1819	1747	1699	1651	1634	1641	1612
3257015	Heuerßen	885	922	925	928	938	937	929	941	958	1003	1024	1017	1035	1019	1004	1020	1036	1009	1018	1018	1032	1019	1022	1022	1030	1055	994	976	965	895
3257016	Hohnhorst	2088	2114	2087	2086	2076	2104	2062	2035	2021	2128	2170	2194	2231	2217	2227	2235	2250	2238	2264	2257	2197	2180	2183	2150	2179	2107	2060	2030	2000	1970
3257017	Hülsede	1054	1046	1020	1045	1049	1016	1012	1047	1050	1034	1048	1035	1058	1070	1068	1111	1081	1075	1083	1056	1043	1063	1064	1071	1043	1052	1045	1018	1010	1022
3257018	Lauenau	4249	4200	4140	4079	4100	4098	4077	4075	4119	4119	4150	4197	4214	4197	4159	4124	4129	4061	4074	3923	3907	3825	3650	3560	3447	3353	3306	3201	3136	3024
3257019	Lauenhagen	1314	1320	1358	1343	1338	1364	1374	1378	1394	1431	1425	1448	1479	1445	1470	1500	1496	1468	1456	1464	1467	1466	1482	1478	1437	1400	1368	1318	1329	1303
3257020	Lindhorst	4292	4331	4361	4342	4351	4358	4348	4377	4389	4400	4488	4492	4569	4585	4617	4632	4683	4709	4708	4752	4762	4778	4777	4674	4679	4649	4581	4542	4528	4489
3257021	Lüdersfeld	1075	1079	1083	1074	1065	1056	1072	1075	1070	1080	1098	1106	1103	1109	1113	1116	1081	1084	1101	1099	1111	1111	1100	1106	1070	1046	1032	1027	998	1020
3257022	Luhden	1134	1119	1102	1076	1081	1079	1067	1090	1079	1089	1113	1104	1129	1133	1150	1153	1127	1116	1107	1112	1090	1107	1063	1049	1026	1009	938	934	915	896
3257023	Meerbeck	1939	1933	1932	1951	1965	1978	1974	1973	1961	2028	2055	2093	2095	2102	2098	2125	2127	2124	2140	2128	2141	2120	2131	2099	2137	2059	2037	2040	2015	1979
3257024	Messenkamp	747	761	764	756	744	746	752	767	752	792	806	810	830	845	843	861	849	840	844	838	828	811	787	808	832	828	823	826	804	798
3257025	Niedernwöhren	2021	2034	2030	2045	1978	1983	1971	1981	1987	1985	2001	1987	2031	2026	2012	2036	2025	1989	1969	1977	1937	1914	1858	1787	1769	1766	1769	1769	1763	1733
3257026	Nienstädt	4450	4491	4543	4576	4566	4609	4606	4634	4642	4702	4728	4736	4808	4860	4905	4904	4959	4934	4958	4964	4918	4914	4902	4791	4693	4662	4647	4649	4556	4565
3257027	Nordsehl	686	698	707	736	730	720	723	728	758	782	784	787	795	824	827	852	847	857	863	835	794	779	813	791	797	779	778	780	751	739
3257028	Obernkirchen	9206	9246	9336	9302	9196	9220	9295	9359	9330	9290	9408	9609	9705	9874	9884	9992	10160	10201	10279	10369	10465	10532	10619	10550	10549	10475	10519	10378	10445	10308
3257029	Pohle	869	856	864	856	851	854	870	855	875	912	920	922	932	953	962	950	953	950	939	937	890	901	870	874	883	883	867	872	865	859
3257030	Pollhagen	1073	1071	1101	1103	1104	1093	1109	1132	1144	1195	1203	1204	1201	1216	1239	1234	1258	1274	1265	1311	1300	1274	1289	1293	1299	1316	1312	1310	1294	1265
3257031	Rinteln	25424	25484	25596	25527	25187	25129	25228	25325	25731	26879	27004	27223	27566	27850	27806	28012	28037	28253	28383	28392	28268	28299	28511	28508	28380	28221	27989	27799	27541	26979
3257032	Rodenberg	6596	6505	6451	6376	6348	6297	6244	6241	6352	6070	6163	6216	6197	6244	6313	6299	6259	6260	6142	6008	5964	5829	5705	5706	5650	5485	5121	4926	4888	4861
3257033	Sachsenhagen	1996	1972	1934	1929	1911	1922	1945	1954	1999	1985	2019	2012	2081	2124	2135	2105	2141	2128	2144	2091	2005	1993	2022	2042	2014	2010	2027	1895	1860	1873
3257034	Seggebruch	1552	1536	1551	1560	1543	1535	1521	1543	1541	1543	1590	1632	1625	1616	1639	1608	1573	1536	1497	1496	1448	1412	1308	1304	1235	1243	1265	1267	1264	1261
3257035	Stadthagen	22262	22247	22158	22148	21814	21694	21594	21595	21582	22272	22344	22638	22821	23092	23181	23157	23352	23655	23767	23802	23829	23840	23885	23829	23566	23291	23254	23222	23004	22778
3257036	Suthfeld	1499	1487	1480	1491	1486	1476	1434	1455	1476	1497	1517	1507	1508	1492	1492	1506	1461	1456	1451	1476	1467	1474	1470	1452	1452	1446	1453	1435	1403	1382
3257037	Wiedensahl	930	958	975	996	1000	1007	1026	1031	1057	1067	1079	1067	1064	1058	1066	1066	1069	1077	1042	1029	1041	1030	1019	1000	1003	1014	995	1004	968	969
3257038	Wölpinghausen	1608	1608	1628	1616	1574	1587	1582	1607	1645	1702	1725	1727	1740	1762	1757	1786	1776	1799	1812	1788	1786	1748	1783	1802	1778	1772	1768	1766	1766	1742
3351001	Adelheidsdorf	2641	2640	2659	2620	2564	2509	2479	2423	2447	2487	2516	2517	2469	2434	2472	2474	2500	2498	2483	2462	2358	2286	2199	2174	2138	2138	2122	2074	2054	2024
3351002	Ahnsbeck	1619	1617	1604	1622	1654	1658	1658	1640	1629	1676	1695	1678	1694	1663	1674	1664	1646	1625	1627	1617	1479	1389	1428	1443	1407	1282	1213	1215	1162	1182
3351003	Beedenbostel	1015	1020	1034	1034	993	1000	1007	1004	998	1049	1063	1052	1078	1049	1083	1052	1039	1074	1072	1040	1042	1080	1079	1062	1040	990	977	943	907	883
3351004	Bergen	13430	13556	13642	13313	13027	12822	12737	12708	12893	12942	13013	13099	13280	13445	13459	13505	13550	13491	13572	13609	13737	13880	13905	13836	13861	13526	13203	12905	12803	12644
3351005	Bröckel	1871	1821	1803	1787	1778	1767	1781	1781	1794	1780	1781	1792	1803	1809	1812	1847	1824	1833	1790	1773	1768	1726	1636	1609	1540	1460	1409	1337	1318	1306
3351006	Celle	69540	69602	69706	69561	69748	68721	68508	68613	68712	70242	70446	70745	70930	71146	71336	71536	71319	71647	71949	72127	72583	72896	73208	73559	73936	73883	73671	73043	72609	72260
3351007	Eicklingen	3205	3199	3214	3208	3202	3182	3194	3164	3204	3193	3192	3218	3268	3262	3277	3278	3276	3260	3279	3220	3191	3117	3076	2977	2887	2802	2660	2497	2397	2353
3351008	Eldingen	1996	2002	2007	2028	2020	2042	2071	2105	2100	2158	2185	2201	2224	2229	2263	2291	2304	2290	2260	2274	2254	2247	2240	2211	2167	2150	2159	2120	2080	2058
3351010	Faßberg	6240	6136	6168	6167	6142	6148	6149	6189	6248	6858	6914	6921	7025	7141	7200	7274	7205	7111	7128	7151	7045	6984	6881	6907	6813	6804	6765	6710	6514	6583
3351012	Hambühren	10422	10317	10185	10228	10227	10126	10021	9973	9962	10159	10133	10159	10208	10275	10209	10129	10148	10037	9958	9796	9478	9217	9055	9047	9006	9039	9029	8931	8864	8673
3351015	Hohne	1685	1668	1662	1664	1679	1658	1647	1666	1688	1759	1767	1775	1790	1797	1834	1825	1821	1819	1800	1804	1811	1822	1810	1818	1818	1803	1772	1759	1742	1724
3351016	Lachendorf	6471	6490	6355	6266	6147	6084	6008	5997	5980	5765	5774	5777	5813	5840	5792	5753	5723	5641	5496	5445	5445	5328	5158	5058	4921	4775	4680	4664	4565	4489
3351017	Langlingen	2129	2151	2148	2172	2179	2197	2194	2201	2227	2226	2260	2287	2311	2328	2338	2328	2340	2378	2353	2359	2290	2285	2227	2243	2237	2189	2153	2142	2108	2101
3351018	Nienhagen	6789	6753	6734	6737	6685	6649	6607	6553	6474	6336	6286	6322	6352	6345	6379	6470	6399	6345	6329	6296	6202	6109	6037	5896	5816	5701	5636	5465	5386	5221
3351021	Wathlingen	6154	6208	6229	6215	6132	6123	6075	6085	6077	6130	6239	6250	6346	6315	6317	6334	6267	6182	6033	6098	6064	6079	6042	6034	5887	5634	5510	5400	5295	5182
3351022	Wienhausen	4077	4107	4116	4124	4159	4150	4170	4171	4196	4117	4148	4188	4175	4186	4208	4192	4222	4166	4110	4088	4030	4017	3944	3848	3810	3711	3685	3569	3554	3488
3351023	Wietze	8360	8271	8270	8248	8096	8045	7991	8064	8009	8087	8088	8139	8249	8260	8260	8248	8232	8248	8195	8135	7960	7966	7808	7713	7616	7497	7268	7110	7020	6979
3351024	Winsen (Aller)	13270	13220	13113	13047	13017	12882	12774	12740	12669	12895	12874	12913	12930	12891	12898	12750	12696	12554	12361	12293	12252	12046	12004	11906	11806	11622	11480	11312	11023	10830
3351025	Eschede	5739	5747	5802	5860	5926	5986	6054	6090	6154	6171	6226	6261	6297	6360	6407	6421	6439	6487	6469	6491	6486	6456	6402	6333	6404	6411	6340	6347	6224	6137
3351026	Südheide	11594	11646	11602	11689	11652	11603	11547	11686	11775	11844	11928	12104	12194	12336	12498	12700	12785	12779	12810	12858	12913	12962	13026	13084	12963	12914	12873	12771	12646	12419
3351501	Lohheide	764	765	755	761	778	787	777	795	790	716	754	763	756	764	769	761	800	830	839	860	893	920	947	939	935	957	1001	1011	1019	1041
3352002	Armstorf	652	658	650	663	646	632	640	638	622	614	623	644	643	636	635	642	643	641	634	638	643	643	669	673	672	670	662	677	669	681
3352004	Belum	812	822	825	821	838	822	809	827	836	829	857	843	832	852	871	878	870	862	896	909	948	938	969	994	949	952	943	963	964	974
3352008	Bülkau	866	852	855	874	884	893	889	885	881	895	897	909	916	912	924	935	935	947	946	961	964	974	1002	1000	1019	1057	1050	1041	1052	1060
3352011	Cuxhaven	48164	48371	48470	48551	48264	48221	48325	48657	48829	50492	50846	51249	51587	51899	52095	52567	52876	53076	53168	53391	53736	53980	54246	54693	55229	55559	56003	56360	56328	56090
3352020	Hechthausen	3453	3425	3432	3447	3475	3459	3428	3466	3463	3463	3501	3533	3502	3546	3553	3587	3586	3578	3528	3565	3547	3501	3449	3485	3450	3439	3424	3419	3384	3400
3352022	Hemmoor	8663	8673	8638	8765	8798	8786	8708	8743	8842	8694	8712	8719	8757	8787	8909	8838	8799	8801	8746	8699	8587	8498	8383	8266	8157	8002	7914	7790	7736	7665
3352024	Hollnseth	868	860	882	889	898	912	905	891	912	892	906	922	926	932	947	939	927	933	922	926	935	925	896	888	866	856	844	822	812	795
3352025	Ihlienworth	1524	1539	1529	1537	1588	1542	1549	1576	1629	1633	1647	1649	1705	1710	1721	1746	1771	1763	1782	1820	1800	1813	1875	1913	1902	1878	1929	1892	1886	1879
3352029	Lamstedt	3314	3360	3356	3332	3349	3304	3319	3313	3308	3249	3300	3341	3341	3381	3387	3363	3356	3332	3318	3287	3291	3264	3250	3184	3151	3135	3075	3103	3094	3050
3352032	Loxstedt	16311	16214	16115	15995	15980	15897	15827	15841	15873	16126	16152	16110	16084	16206	16261	16431	16527	16676	16624	16466	16498	16438	16246	16100	15889	15719	15404	15254	15047	14933
3352036	Mittelstenahe	627	616	609	604	601	607	602	625	619	626	627	631	653	651	639	651	648	663	663	650	644	634	633	640	637	642	642	621	610	599
3352038	Neuenkirchen	1303	1334	1314	1326	1378	1342	1346	1380	1373	1425	1407	1428	1456	1484	1500	1515	1549	1526	1516	1529	1501	1455	1447	1416	1401	1389	1409	1378	1370	1343
3352039	Neuhaus (Oste)	1114	1110	1151	1171	1186	1159	1187	1188	1204	1148	1153	1186	1212	1253	1266	1264	1283	1285	1260	1265	1275	1294	1291	1269	1261	1276	1346	1356	1315	1305
3352041	Nordleda	1053	1041	1047	1047	1084	1081	1085	1084	1101	1138	1110	1111	1153	1160	1175	1196	1206	1229	1234	1211	1214	1203	1176	1155	1143	1160	1164	1202	1186	1176
3352042	Oberndorf	1352	1344	1352	1365	1359	1375	1401	1387	1405	1444	1470	1456	1488	1509	1532	1577	1572	1588	1593	1580	1605	1590	1572	1588	1611	1647	1620	1666	1652	1663
3352043	Odisheim	473	487	484	488	497	503	511	515	536	568	570	572	590	588	607	608	612	607	590	608	609	612	613	614	621	599	596	583	604	601
3352044	Osten	1787	1821	1817	1821	1820	1859	1842	1833	1856	1947	1943	1948	1974	1971	1973	2006	2009	2032	2017	1987	2016	2018	1997	2009	1993	2000	1959	1977	1941	1929
3352045	Osterbruch	489	483	486	502	520	510	526	539	542	566	563	555	565	576	568	578	572	561	570	564	564	543	546	511	519	513	508	497	501	507
3352046	Otterndorf	7311	7238	7237	7283	7230	7147	7142	7136	7072	7093	7110	7049	7068	7113	7102	7001	6965	6965	6894	6817	6801	6624	6444	6344	6244	6262	6181	6267	6233	6142
3352050	Schiffdorf	14339	14274	14182	14211	14095	13833	13733	13735	13714	14008	14018	14029	13981	13962	14121	14196	14090	14038	14085	13829	13489	13256	12962	12791	12597	12335	12106	11859	11649	11422
3352051	Steinau	825	829	825	838	845	853	859	858	883	892	892	935	942	946	934	951	955	958	980	957	973	979	975	976	1006	986	1015	997	1007	1018
3352052	Stinstedt	557	551	556	574	558	561	562	564	569	549	535	546	567	559	568	566	577	560	573	569	571	573	603	600	605	608	615	615	649	649
3352055	Wanna	2228	2187	2171	2175	2179	2188	2188	2231	2227	2329	2340	2340	2369	2397	2421	2428	2429	2439	2435	2416	2432	2441	2401	2352	2352	2361	2305	2284	2296	2265
3352056	Wingst	3320	3320	3340	3370	3414	3414	3415	3454	3428	3426	3503	3553	3537	3607	3630	3610	3597	3629	3638	3653	3682	3610	3637	3605	3670	3662	3560	3516	3515	3503
3352059	Beverstedt	13545	13554	13526	13604	13503	13385	13502	13629	13670	13694	13725	13783	13878	14064	14182	14240	14296	14314	14332	14225	14075	13905	13663	13585	13365	13170	12882	12787	12510	12406
3352060	Hagen im Bremischen	10947	11071	11099	11106	10991	10971	10960	10991	11027	11036	11023	11136	11144	11193	11225	11259	11111	10971	10845	10652	10418	10265	10107	10035	10025	9789	9705	9522	9213	9179
3352061	Wurster Nordseeküste	17095	17069	17094	17102	16965	16839	16799	16843	16953	17033	17046	17119	17215	17313	17366	17336	17340	17191	17142	16763	16454	16065	15728	15685	15570	15425	15292	15191	15122	15162
3352062	Geestland	30847	30866	30873	31040	30936	30589	30411	30515	30634	30613	30659	30700	30736	30977	31139	31243	31251	31041	31051	30738	30440	30017	29709	29281	28794	28214	27745	27440	27093	26726
3352063	Cadenberge	4199	4244	4233	4269	4126	4137	4118	4134	4153	4066	4072	4127	4156	4117	4133	4126	4158	4121	4152	4122	4098	4074	3991	3937	3898	3870	3845	3853	3892	3836
3353001	Appel	2006	1963	1970	1962	1936	1915	1859	1855	1830	1957	1912	1958	1979	1991	1939	1930	1900	1870	1795	1760	1707	1700	1647	1602	1588	1557	1534	1494	1445	1462
3353002	Asendorf	1972	1967	1939	1882	1882	1817	1873	1924	1903	1856	1840	1816	1812	1838	1820	1821	1772	1736	1697	1692	1670	1668	1639	1596	1559	1572	1507	1491	1470	1442
3353003	Bendestorf	2354	2396	2427	2387	2337	2334	2275	2275	2262	2401	2365	2380	2333	2302	2267	2237	2231	2212	2180	2167	2135	2111	2089	2054	2030	2058	2029	2049	2045	1947
3353004	Brackel	1908	1957	1890	1878	1827	1760	1747	1767	1767	1704	1682	1641	1668	1685	1699	1640	1652	1651	1638	1612	1602	1597	1561	1530	1508	1501	1485	1442	1463	1446
3353005	Buchholz i. d. Nordheide	39729	39272	39042	38689	38487	38201	37876	37321	36875	38735	38517	38415	38162	38167	37987	37556	36943	36483	36109	35916	35603	35264	34764	34374	34042	33690	33335	32838	32177	31489
3353006	Dohren	1253	1248	1221	1196	1156	1159	1121	1114	1080	1153	1124	1099	1045	1027	1003	983	973	974	987	985	957	933	893	882	866	851	819	791	795	740
3353007	Drage	4220	4243	4187	4172	4188	4155	4122	4065	3971	3948	3949	3886	3806	3692	3651	3576	3508	3459	3371	3275	3136	3004	2830	2715	2567	2466	2437	2401	2391	2357
3353008	Drestedt	786	776	768	797	791	783	776	764	744	803	788	791	801	789	768	750	757	756	745	716	704	707	695	711	710	691	673	671	679	662
3353009	Egestorf	2686	2615	2565	2598	2509	2452	2372	2396	2395	2381	2376	2394	2402	2394	2402	2426	2408	2366	2412	2401	2365	2315	2287	2300	2272	2201	2189	2198	2162	2165
3353010	Eyendorf	1233	1216	1244	1257	1230	1226	1220	1221	1235	1287	1283	1247	1248	1223	1221	1176	1184	1131	1103	1027	1037	1017	1010	1000	977	964	989	1006	950	950
3353011	Garlstorf	1124	1103	1097	1106	1135	1103	1101	1071	1081	1084	1080	1082	1086	1087	1101	1071	1040	1008	1001	987	1009	975	970	938	933	917	903	878	871	827
3353012	Garstedt	1437	1453	1463	1474	1447	1484	1455	1449	1449	1445	1457	1461	1428	1445	1427	1426	1399	1341	1332	1335	1349	1310	1303	1262	1216	1212	1209	1194	1121	1101
3353013	Gödenstorf	975	983	968	965	968	937	929	917	931	929	956	961	967	959	963	976	958	957	936	924	919	932	911	886	848	826	813	758	737	730
3353014	Halvesbostel	751	749	754	768	763	767	747	729	728	737	748	739	730	715	741	748	721	712	714	703	694	695	679	654	634	603	599	593	596	567
3353015	Handeloh	2539	2487	2488	2527	2411	2355	2355	2365	2393	2436	2423	2482	2495	2453	2471	2450	2466	2425	2424	2419	2383	2298	2188	2150	2111	2109	2040	2020	1950	1848
3353016	Hanstedt	5759	5653	5595	5524	5438	5275	5236	5239	5317	5169	5055	4990	4911	4800	4784	4700	4607	4641	4605	4548	4518	4514	4458	4490	4529	4547	4531	4524	4447	4316
3353017	Harmstorf	821	848	829	851	868	878	891	885	884	916	908	926	936	931	924	935	910	907	893	883	823	763	731	734	734	715	690	701	679	676
3353018	Heidenau	2243	2253	2222	2241	2255	2171	2150	2133	2098	2145	2143	2142	2141	2131	2098	2098	2052	2023	1990	1949	1951	1929	1899	1858	1832	1774	1698	1681	1666	1635
3353019	Hollenstedt	3828	3806	3725	3677	3609	3595	3536	3452	3400	3159	3148	3186	3137	3096	3105	3065	3039	2987	2921	2919	2838	2763	2665	2624	2625	2529	2540	2510	2441	2420
3353020	Jesteburg	7969	7903	7966	7986	7883	7900	7748	7625	7449	7455	7416	7396	7345	7270	7291	7194	7111	7157	7018	6890	6819	6673	6579	6543	6466	6413	6384	6307	6180	6120
3353021	Kakenstorf	1450	1417	1393	1381	1352	1341	1341	1299	1312	1411	1414	1411	1380	1368	1382	1359	1361	1342	1323	1315	1308	1263	1237	1201	1158	1148	1124	1110	1065	1023
3353022	Königsmoor	622	607	611	618	625	615	639	626	638	666	673	658	656	665	662	659	627	627	643	639	626	623	613	595	578	562	566	555	557	530
3353023	Marschacht	3940	3933	3917	3881	3775	3806	3814	3812	3731	3602	3617	3626	3650	3606	3569	3596	3550	3520	3446	3394	3174	3031	3005	2962	2823	2736	2717	2651	2625	2562
3353024	Marxen	1481	1519	1507	1556	1535	1459	1435	1365	1386	1338	1344	1338	1346	1314	1301	1257	1205	1160	1178	1172	1137	1116	1094	1086	1051	1032	1011	985	969	960
3353025	Moisburg	1891	1902	1936	1891	1898	1887	1816	1795	1761	1763	1794	1769	1787	1776	1778	1782	1795	1788	1764	1737	1695	1615	1575	1583	1547	1514	1498	1515	1501	1481
3353026	Neu Wulmstorf	21258	21136	21159	21027	20828	20628	20384	20053	19935	20846	20697	20557	20649	20545	20413	20341	20344	20543	20323	19898	19648	19369	18841	18393	17931	17487	16889	16751	16310	15466
3353027	Otter	1721	1724	1719	1706	1716	1634	1568	1542	1545	1565	1534	1522	1545	1523	1524	1493	1455	1467	1493	1477	1451	1420	1394	1372	1317	1278	1252	1212	1193	1143
3353028	Regesbostel	1055	1061	1059	1041	1066	1069	1059	1074	1075	1090	1084	1096	1067	1061	1017	1018	1033	1004	1001	1007	992	950	911	883	859	856	846	815	802	773
3353029	Rosengarten, Kr Harburg	13672	13553	13561	13454	13337	13256	13176	12998	12907	13477	13505	13385	13434	13246	13207	13242	13261	13305	13220	13094	12917	12702	12400	11962	11536	11251	11114	11022	10907	10764
3353030	Salzhausen	4870	4844	4787	4797	4787	4712	4688	4687	4642	4558	4517	4534	4455	4444	4381	4397	4346	4287	4230	4224	4142	4084	3989	3902	3822	3737	3673	3577	3493	3384
3353031	Seevetal	41591	41506	41260	41234	40949	40463	40159	39869	39921	42213	41860	41560	41330	41467	41614	41287	41157	41060	40819	40536	40164	39564	39185	38834	38383	38124	37758	37401	37154	36740
3353032	Stelle	11305	11156	11102	11104	11086	10918	10819	10810	10827	11044	11053	11038	11061	10989	11018	10958	11086	11100	10996	10871	10715	10574	10302	10013	9896	9792	9512	9434	9264	9107
3353033	Tespe	4717	4573	4448	4413	4279	4168	4132	4090	4064	4066	4069	4086	4073	4049	4000	3972	3968	3925	3990	3917	3870	3836	3786	3761	3719	3591	3461	3416	3348	3245
3353034	Toppenstedt	2146	2129	2191	2185	2176	2137	2108	2101	2126	2098	2108	2109	2126	2136	2134	2134	2117	2112	2108	2063	2068	2083	2039	2020	1986	1932	1884	1826	1728	1727
3353035	Tostedt	13818	13832	13816	13895	13704	13555	13323	13121	13089	13232	13209	13186	13258	13269	13341	13330	13330	13346	13332	13256	13065	12834	12728	12508	12415	12027	11796	11367	11179	10856
3353036	Undeloh	1005	999	987	964	958	944	954	957	979	942	934	927	940	942	920	917	885	889	876	868	871	852	860	838	819	836	841	823	810	799
3353037	Vierhöfen	962	987	988	961	957	951	966	971	986	994	1003	1007	1003	967	999	951	925	885	889	866	848	890	875	865	878	874	849	816	794	776
3353038	Welle	1198	1197	1177	1190	1209	1231	1208	1199	1193	1225	1242	1260	1240	1253	1246	1261	1245	1239	1233	1200	1186	1188	1153	1083	1046	1052	1023	1031	1018	1022
3353039	Wenzendorf	1394	1440	1434	1390	1343	1326	1265	1275	1271	1383	1355	1345	1338	1332	1294	1276	1254	1246	1197	1168	1137	1105	1104	1114	1083	1090	1049	1026	993	987
3353040	Winsen (Luhe)	35227	34896	34635	34284	33896	33494	33351	32968	32638	34247	34034	33830	33656	33336	32928	32674	32455	32261	32055	31801	31545	31096	30914	30574	30054	29406	28839	28284	27831	27338
3353041	Wistedt	1764	1763	1754	1743	1715	1686	1655	1660	1670	1714	1724	1703	1705	1701	1701	1684	1684	1637	1550	1537	1497	1502	1489	1487	1462	1431	1398	1365	1339	1353
3353042	Wulfsen	1751	1711	1662	1689	1671	1600	1605	1629	1615	1663	1684	1672	1669	1629	1629	1616	1580	1578	1550	1517	1416	1413	1399	1387	1378	1332	1320	1319	1314	1327
3354001	Bergen an der Dumme	1428	1436	1406	1573	1595	1571	1583	1563	1589	1508	1564	1537	1494	1546	1564	1577	1576	1594	1573	1572	1582	1585	1571	1621	1645	1610	1578	1556	1547	1511
3354002	Clenze	2276	2299	2311	2347	2382	2341	2342	2357	2446	2254	2247	2256	2308	2337	2377	2403	2418	2388	2351	2392	2459	2499	2489	2462	2417	2434	2440	2362	2331	2316
3354003	Damnatz	297	291	284	301	294	301	301	314	317	328	335	331	332	334	345	342	351	357	360	371	371	370	365	371	368	362	357	377	370	374
3354004	Dannenberg (Elbe)	8181	8200	8311	8330	8932	8199	8145	8088	8081	8147	8204	8230	8373	8441	8521	8521	8476	8540	8625	8727	8693	8748	8783	8606	8510	8275	8167	8058	8025	7920
3354005	Gartow	1446	1425	1411	1443	1397	1375	1374	1352	1362	1349	1364	1373	1361	1382	1418	1417	1412	1436	1455	1437	1457	1458	1437	1388	1414	1370	1344	1334	1317	1265
3354006	Göhrde	582	581	593	607	611	609	623	630	635	633	641	661	673	675	674	700	706	713	720	744	723	721	728	719	728	709	710	709	709	663
3354007	Gorleben	602	597	600	610	625	617	613	620	634	642	638	644	680	674	660	661	644	657	636	641	616	624	633	640	645	651	667	646	624	623
3354008	Gusborn	1196	1205	1194	1202	1204	1222	1226	1229	1225	1286	1297	1309	1290	1293	1300	1304	1286	1278	1281	1293	1327	1308	1333	1321	1285	1264	1236	1217	1200	1205
3354009	Hitzacker (Elbe)	4936	4951	4901	4921	4904	4916	4896	4932	4933	4888	4904	4956	4982	4956	5045	5108	5141	5109	5090	5069	5065	5091	5047	5090	5037	5052	5017	5049	5028	4845
3354010	Höhbeck	647	638	642	642	656	634	646	640	645	687	681	689	711	720	735	741	759	759	752	751	751	737	733	742	774	763	799	782	783	751
3354011	Jameln	1088	1074	1036	1050	1028	1051	1043	1062	1071	1097	1089	1090	1107	1111	1129	1124	1116	1138	1135	1129	1139	1128	1113	1118	1114	1104	1120	1126	1102	1080
3354012	Karwitz	732	733	726	737	745	737	728	742	742	785	804	817	791	802	822	813	805	816	800	808	782	765	751	777	772	726	706	712	694	692
3354013	Küsten	1361	1368	1390	1378	1363	1350	1334	1367	1362	1391	1395	1407	1419	1443	1453	1454	1435	1421	1416	1440	1438	1408	1401	1396	1377	1411	1397	1402	1327	1316
3354014	Langendorf	677	692	685	690	676	699	705	703	719	701	712	721	731	732	716	719	717	720	715	733	723	714	707	738	760	734	731	726	719	680
3354015	Lemgow	1356	1346	1366	1381	1390	1380	1397	1392	1408	1389	1396	1433	1466	1464	1487	1502	1528	1523	1499	1491	1521	1529	1537	1527	1540	1572	1567	1538	1566	1561
3354016	Luckau (Wendland)	557	542	553	614	631	638	642	642	634	640	662	640	649	670	653	678	691	637	627	608	605	617	596	591	588	584	585	556	572	563
3354017	Lübbow	807	805	809	830	822	824	828	836	836	820	826	816	821	837	843	850	846	846	847	863	854	838	827	834	794	789	779	779	769	782
3354018	Lüchow (Wendland)	9428	9388	9256	9214	9481	9339	9337	9417	9401	9432	9533	9523	9566	9656	9692	9689	9718	9759	9766	9801	9796	9809	9872	9862	9837	9864	9767	9750	9670	9700
3354019	Neu Darchau	1374	1383	1370	1388	1393	1372	1371	1403	1396	1457	1486	1481	1512	1516	1538	1511	1529	1523	1520	1555	1564	1600	1569	1524	1522	1516	1488	1402	1363	1348
3354020	Prezelle	435	420	429	440	439	447	457	464	473	480	481	501	495	515	535	537	530	554	565	564	554	539	546	557	567	551	538	516	516	498
3354021	Schnackenburg	544	564	562	548	564	566	577	577	586	588	610	613	645	651	658	670	658	650	673	678	684	674	683	677	695	719	735	750	764	767
3354022	Schnega	1302	1315	1326	1308	1320	1298	1303	1354	1354	1358	1401	1407	1423	1447	1457	1470	1515	1543	1544	1556	1568	1591	1601	1579	1601	1557	1532	1542	1556	1575
3354023	Trebel	976	972	1003	1010	1002	993	956	953	953	911	925	947	954	970	961	995	997	1021	1036	1060	1041	1054	1048	1047	1050	1054	1036	1046	1044	1035
3354024	Waddeweitz	886	900	889	891	942	869	886	890	906	903	916	929	957	953	960	958	955	968	993	1002	1008	1007	991	988	950	953	936	947	946	947
3354025	Woltersdorf	895	896	890	890	1228	916	928	957	939	974	997	1000	1012	1044	1045	1035	1027	1021	1044	1055	1043	1048	990	954	964	931	943	986	957	992
3354026	Wustrow (Wendland)	2774	2788	2792	2856	2866	2852	2834	2858	2847	2994	2988	3021	3079	3050	3108	3135	3108	3130	3168	3141	3099	3125	3163	3115	3123	3070	2980	2860	2755	2737
3354027	Zernien	1629	1615	1622	1624	1638	1612	1595	1586	1588	1571	1603	1633	1634	1659	1656	1664	1680	1665	1629	1619	1616	1607	1615	1616	1580	1563	1537	1508	1483	1469
3355001	Adendorf	10853	10754	10783	10840	10724	10651	10611	10462	10288	10253	10163	10104	10094	9988	9815	9789	9824	9784	9714	9606	9536	9668	9533	9543	9290	9087	9068	8982	8895	8663
3355002	Amelinghausen	4039	4030	4004	4011	4062	4041	3982	3937	3962	3801	3768	3785	3814	3785	3847	3904	3858	3802	3738	3705	3599	3574	3440	3344	3309	3207	3091	2944	2833	2769
3355003	Artlenburg	1707	1674	1650	1644	1637	1625	1610	1588	1610	1600	1630	1630	1619	1653	1658	1662	1627	1614	1619	1562	1512	1448	1385	1337	1356	1336	1272	1284	1259	1233
3355004	Bardowick	7013	7015	6993	6960	6867	6800	6729	6567	6473	6392	6295	6219	6140	6068	6076	6042	5935	5845	5652	5481	5361	5305	5251	5051	4848	4750	4686	4747	4712	4612
3355005	Barendorf	2470	2459	2473	2496	2566	2564	2540	2489	2418	2384	2365	2368	2344	2321	2245	2165	2133	2094	2036	2086	2017	1870	1683	1619	1517	1379	1288	1281	1214	1186
3355006	Barnstedt	726	732	742	743	735	726	751	748	747	776	740	769	797	802	803	803	799	792	792	789	765	723	692	673	651	682	707	678	669	647
3355007	Barum	2058	2025	2013	1980	1911	1888	1847	1852	1828	1901	1865	1855	1844	1832	1843	1788	1745	1709	1652	1635	1600	1541	1536	1493	1472	1450	1371	1320	1278	1238
3355008	Betzendorf	1113	1137	1144	1140	1125	1139	1131	1146	1156	1152	1151	1143	1123	1110	1154	1145	1114	1088	1064	1061	1055	1034	1055	1023	994	945	915	890	882	870
3355009	Bleckede	9471	9457	9406	9467	9439	9420	9505	9515	9532	9578	9653	9649	9728	9785	9707	9781	9750	9708	9657	9574	9465	9364	9292	9168	9084	8933	8815	8718	8522	8421
3355010	Boitze	374	385	371	377	391	385	374	397	393	394	399	408	416	425	422	417	421	433	447	441	411	391	386	385	403	405	402	387	383	395
3355011	Brietlingen	3532	3498	3507	3499	3476	3424	3373	3340	3319	3311	3288	3253	3240	3218	3219	3142	3099	3049	2942	2735	2574	2339	2220	2207	2191	2120	2058	2002	1967	1946
3355012	Dahlem	620	628	616	598	599	597	580	593	599	506	508	515	527	530	529	528	540	537	532	513	519	514	552	532	526	501	501	510	497	480
3355013	Dahlenburg	3295	3315	3323	3342	3313	3304	3300	3286	3351	3356	3366	3380	3449	3461	3478	3506	3447	3429	3423	3426	3428	3455	3425	3354	3330	3356	3280	3308	3214	3101
3355014	Deutsch Evern	3709	3721	3764	3770	3770	3766	3754	3774	3736	3727	3709	3692	3683	3629	3610	3644	3616	3508	3438	3397	3349	3267	3239	3234	3257	3212	3161	2982	2858	2779
3355015	Echem	1058	1032	1013	978	969	982	994	1013	1017	1018	1021	1041	1021	1021	1015	1030	1020	1019	996	937	900	859	824	828	838	822	789	764	735	702
3355016	Embsen	2783	2747	2647	2545	2544	2554	2616	2627	2630	2676	2715	2726	2693	2685	2654	2598	2505	2514	2464	2465	2369	2362	2299	2286	2265	2249	2129	2120	2096	2041
3355017	Handorf	2108	2097	2061	2027	1981	1961	1970	1982	1953	1985	2024	2024	2045	2071	2078	2044	2027	1992	1947	1873	1812	1740	1707	1652	1543	1382	1295	1250	1188	1163
3355018	Hittbergen	892	896	899	882	920	910	930	920	912	893	886	888	859	864	878	840	864	849	825	767	777	773	779	780	767	773	683	695	695	675
3355019	Hohnstorf (Elbe)	2397	2396	2413	2457	2423	2408	2389	2399	2408	2474	2478	2488	2536	2484	2465	2492	2499	2460	2454	2451	2387	2376	2252	2189	2129	2049	1971	1947	1923	1907
3355020	Kirchgellersen	2534	2551	2467	2433	2374	2377	2340	2264	2279	2140	2148	2111	2094	2073	2065	2048	2092	2062	2068	1976	2017	1966	1909	1864	1796	1742	1718	1625	1555	1550
3355021	Lüdersburg	642	634	630	639	647	650	632	620	624	635	645	642	642	660	661	672	660	644	627	632	611	560	543	516	502	481	479	493	497	497
3355022	Lüneburg	75711	75351	75192	74494	74072	72546	71668	71009	70438	72983	72800	72492	72299	72057	71842	71306	70614	69971	68234	67398	66721	66340	65813	65071	64558	64030	63299	63557	62944	61870
3355023	Mechtersen	687	700	703	706	691	707	691	682	662	653	659	657	656	659	667	652	665	648	668	653	654	648	657	656	665	638	641	634	620	589
3355024	Melbeck	3323	3335	3375	3364	3385	3368	3361	3370	3373	3392	3399	3363	3325	3335	3346	3326	3332	3306	3272	3141	3027	2833	2702	2647	2690	2599	2541	2435	2331	2308
3355025	Nahrendorf	1239	1244	1244	1224	1253	1248	1230	1247	1236	1370	1378	1364	1355	1368	1386	1398	1399	1381	1396	1404	1420	1405	1363	1373	1366	1346	1315	1277	1236	1224
3355026	Neetze	2650	2629	2684	2704	2702	2680	2609	2583	2583	2608	2592	2626	2620	2653	2662	2616	2618	2570	2541	2498	2447	2357	2319	2256	2202	2171	2106	2032	1957	1933
3355027	Oldendorf (Luhe)	1014	1001	1015	1015	1010	999	978	976	985	1001	981	1012	1009	1040	1025	1022	1017	1015	1008	1012	983	959	962	947	938	918	885	881	874	870
3355028	Radbruch	2217	2208	2156	2056	2047	2007	1989	1997	1970	1915	1899	1880	1864	1843	1845	1846	1850	1802	1706	1683	1704	1687	1682	1631	1605	1599	1562	1555	1531	1516
3355029	Rehlingen	737	758	767	754	743	738	714	720	712	720	744	736	751	731	748	739	728	726	752	757	734	686	688	680	671	637	637	636	630	643
3355030	Reinstorf	1277	1287	1304	1321	1283	1295	1302	1310	1290	1303	1349	1336	1335	1338	1343	1350	1334	1330	1325	1320	1294	1304	1288	1273	1254	1245	1199	1150	1152	1117
3355031	Reppenstedt	7668	7581	7370	7171	7234	7229	7173	7199	7210	7155	7052	7005	7009	6865	6719	6648	6705	6712	6715	6805	6823	6794	6753	6687	6632	6396	5958	5544	5409	5278
3355032	Rullstorf	1881	1911	1909	1891	1914	1869	1892	1869	1880	1827	1834	1818	1779	1798	1784	1785	1794	1769	1758	1720	1654	1544	1507	1439	1411	1370	1325	1321	1308	1279
3355033	Scharnebeck	3481	3507	3535	3590	3552	3461	3367	3321	3321	3213	3198	3212	3183	3195	3206	3269	3279	3284	3266	3321	3293	3298	3284	3233	3142	2957	2895	2764	2614	2596
3355034	Soderstorf	1470	1427	1430	1420	1413	1441	1444	1435	1444	1506	1504	1513	1488	1503	1546	1540	1525	1514	1457	1384	1345	1337	1354	1325	1280	1237	1176	1132	1099	1063
3355035	Südergellersen	1835	1781	1675	1594	1630	1615	1603	1637	1602	1624	1651	1600	1610	1603	1578	1556	1557	1520	1474	1470	1445	1423	1390	1317	1311	1290	1259	1230	1166	1121
3355036	Thomasburg	1349	1368	1348	1323	1333	1310	1317	1308	1291	1302	1328	1297	1311	1321	1334	1329	1279	1289	1257	1284	1254	1220	1167	1169	1146	1111	1077	1073	1055	1045
3355037	Tosterglope	596	599	581	569	565	558	551	549	571	627	643	655	655	648	650	648	636	644	671	624	625	617	630	612	623	623	623	624	592	577
3355038	Vastorf	825	808	831	818	827	804	830	824	815	903	906	924	936	952	952	965	954	965	941	902	861	825	835	846	843	829	852	839	808	782
3355039	Vögelsen	2347	2293	2339	2325	2345	2300	2273	2250	2255	2267	2315	2309	2344	2348	2345	2307	2230	2163	2182	2189	2213	2226	2096	2023	2016	2003	2049	2010	1957	1919
3355040	Wendisch Evern	1761	1740	1772	1766	1745	1722	1757	1768	1781	1763	1754	1732	1758	1705	1672	1628	1568	1539	1528	1510	1486	1418	1416	1426	1368	1348	1285	1206	1128	1105
3355041	Westergellersen	2258	2177	2053	1969	1904	1811	1772	1764	1758	1748	1708	1682	1721	1720	1721	1702	1697	1685	1663	1616	1457	1367	1339	1299	1212	1128	1055	1022	1001	950
3355042	Wittorf	1454	1479	1489	1499	1471	1466	1448	1482	1443	1475	1448	1441	1444	1410	1430	1402	1303	1224	1206	1210	1164	1159	1087	1052	1022	986	980	962	940	957
3355049	Amt Neuhaus	4965	5005	5239	5204	5127	4776	4800	4821	4830	4972	5083	5168	5285	5349	5418	5492	5505	5574	5627	5648	5679	5732	5806	5807	5870	5928	5989	5939	5975	6057
3356001	Axstedt	1192	1183	1161	1166	1153	1144	1169	1117	1115	1114	1134	1147	1145	1173	1175	1167	1182	1182	1163	1121	1157	1146	1180	1239	1216	1198	1148	1150	1117	1092
3356002	Grasberg	7783	7767	7743	7747	7694	7637	7654	7584	7628	7595	7641	7658	7681	7700	7726	7727	7702	7708	7650	7614	7475	7317	7205	7043	6841	6758	6675	6582	6459	6395
3356003	Hambergen	5637	5651	5700	5724	5705	5725	5698	5722	5753	5484	5485	5497	5524	5513	5573	5535	5468	5464	5386	5389	5368	5258	5178	5133	5060	4984	4901	4839	4736	4699
3356004	Holste	1397	1365	1365	1346	1326	1317	1293	1304	1301	1358	1350	1365	1354	1362	1386	1366	1353	1309	1275	1222	1224	1200	1163	1081	1035	987	921	892	871	835
3356005	Lilienthal	19485	19305	19061	18796	18819	18528	18304	18239	18104	18364	18297	18239	18217	18190	18273	18214	18117	17943	17992	17733	17516	17214	16876	16614	16645	16660	16671	16623	16478	16337
3356006	Lübberstedt	737	742	739	742	738	742	747	734	750	737	740	747	751	737	726	748	762	760	771	770	711	708	698	663	682	656	639	654	613	599
3356007	Osterholz-Scharmbeck	30256	30300	30329	30398	30302	30032	29942	30052	30097	30198	30275	30538	30778	30714	30942	31145	31339	31297	31253	31206	31096	30822	30550	30557	30501	29961	29587	27644	25300	24705
3356008	Ritterhude	14684	14688	14703	14598	14680	14521	14464	14452	14455	14658	14654	14637	14574	14545	14366	14253	14094	13997	13871	13713	13633	13603	13500	13432	13382	13296	13177	13067	12985	12807
3356009	Schwanewede	20421	20300	20142	20075	21040	19756	19574	19540	19484	19904	19971	20061	20087	19951	19949	19977	19842	19670	19514	19218	18897	18433	18215	18037	17952	17816	17504	17279	17131	16989
3356010	Vollersode	2842	2828	2813	2841	2837	2850	2880	2905	2932	3057	3055	3101	3104	3144	3170	3159	3180	3151	3120	3059	3061	3033	3015	2955	2982	2995	2955	2893	2896	2858
3356011	Worpswede	9494	9388	9349	9262	9285	9232	9157	9167	9223	9407	9427	9496	9464	9469	9455	9502	9463	9511	9478	9537	9400	9350	9319	9257	9280	9263	9168	9035	9009	8896
3357001	Ahausen	1912	1873	1886	1923	1888	1855	1850	1822	1828	1865	1868	1861	1847	1849	1812	1807	1775	1781	1770	1695	1661	1624	1557	1530	1527	1499	1479	1462	1432	1422
3357002	Alfstedt	852	866	869	868	864	872	852	858	856	838	835	858	860	864	839	844	862	845	858	848	840	825	824	816	808	803	806	805	799	800
3357003	Anderlingen	829	859	865	876	880	884	890	883	897	906	909	910	918	928	932	930	933	929	943	941	925	909	915	902	878	876	899	899	880	868
3357004	Basdahl	1369	1379	1383	1403	1430	1420	1430	1464	1475	1461	1483	1481	1480	1480	1478	1484	1502	1466	1475	1511	1502	1499	1452	1434	1418	1352	1377	1372	1343	1357
3357005	Bötersen	1077	1074	1060	1075	1070	1056	1061	1059	1061	1079	1091	1090	1071	1083	1069	1073	1036	1017	1012	1014	1003	1016	974	970	926	879	867	861	850	855
3357006	Bothel	2376	2380	2375	2414	2428	2415	2407	2450	2482	2453	2435	2449	2468	2482	2476	2485	2462	2469	2399	2357	2240	2075	2028	1933	1829	1789	1799	1782	1763	1734
3357007	Breddorf	1019	1011	1061	1067	1065	1082	1086	1096	1092	1123	1139	1149	1168	1184	1174	1218	1211	1187	1201	1166	1161	1123	1149	1140	1136	1127	1119	1122	1114	1119
3357008	Bremervörde	18582	18528	18623	18608	18645	18688	18701	18615	18637	18743	18815	18939	19053	19118	19113	19190	19257	19248	19386	19244	19194	19068	19062	19160	19004	18696	18629	18458	18205	18071
3357009	Brockel	1363	1346	1340	1306	1320	1318	1318	1319	1329	1357	1374	1365	1358	1374	1370	1389	1359	1325	1314	1285	1243	1207	1192	1169	1122	1115	1073	1039	1035	1004
3357010	Bülstedt	778	737	744	748	753	746	727	725	738	732	733	728	726	731	719	706	709	706	692	675	665	653	655	655	658	656	659	648	620	626
3357011	Deinstedt	664	672	659	665	658	643	642	656	662	694	684	691	699	697	698	693	675	672	677	694	696	686	669	656	658	648	653	644	658	670
3357012	Ebersdorf	1042	1068	1062	1061	1058	1075	1056	1046	1047	1066	1093	1103	1122	1104	1148	1138	1149	1145	1143	1146	1164	1157	1134	1113	1101	1087	1017	1039	1038	1042
3357013	Elsdorf	1996	2004	2022	2070	2043	2039	2043	2028	2051	2063	2094	2104	2087	2121	2099	2079	2047	2042	2014	1967	1935	1919	1923	1918	1859	1866	1831	1787	1772	1708
3357014	Farven	608	608	612	615	634	640	647	641	650	698	696	709	720	703	712	725	731	729	738	726	711	721	703	684	691	687	677	691	683	678
3357015	Fintel	2856	2885	2850	2880	2885	2838	2855	2872	2855	2906	2905	2892	2909	2939	2952	2971	2985	2995	2988	2909	2863	2801	2780	2752	2653	2574	2514	2456	2354	2293
3357016	Gnarrenburg	9187	9204	9222	9246	9238	9137	9137	9179	9260	9296	9340	9396	9513	9535	9552	9519	9488	9473	9444	9407	9328	9279	9199	9153	9116	8961	8867	8749	8672	8527
3357017	Groß Meckelsen	500	511	478	477	466	475	474	464	470	510	502	496	495	506	495	507	510	517	521	508	500	483	476	489	486	483	469	471	460	453
3357018	Gyhum	2360	2357	2296	2269	2271	2261	2239	2247	2292	2378	2387	2369	2390	2401	2411	2457	2398	2374	2362	2327	2284	2279	2219	2168	2146	2078	2086	2112	2099	2049
3357019	Hamersen	465	446	426	441	453	460	464	466	465	461	468	468	466	474	480	487	477	471	472	469	456	441	431	434	433	441	436	431	428	431
3357020	Hassendorf	1160	1148	1133	1147	1120	1116	1112	1132	1142	1155	1158	1146	1154	1142	1146	1149	1154	1152	1141	1091	1082	1061	1005	991	991	928	958	926	874	891
3357021	Heeslingen	4832	4812	4777	4815	4681	4676	4680	4659	4629	4784	4778	4816	4817	4790	4876	4837	4783	4796	4724	4721	4625	4431	4399	4346	4279	4197	4141	4145	4130	4124
3357022	Hellwege	1090	1086	1068	1046	1041	1071	1061	1061	1052	1114	1109	1103	1106	1107	1102	1097	1065	1047	1038	1019	1014	980	987	1019	955	923	883	891	884	859
3357023	Helvesiek	818	797	791	770	792	769	755	753	758	789	808	810	819	839	855	859	859	852	823	804	810	767	758	716	685	668	674	678	650	649
3357024	Hemsbünde	1142	1152	1147	1154	1178	1163	1146	1134	1149	1223	1225	1256	1260	1273	1248	1253	1250	1247	1232	1186	1129	1100	1107	1096	1078	1056	1065	1100	1087	1081
3357025	Hemslingen	1429	1442	1415	1408	1405	1383	1403	1421	1424	1530	1543	1535	1528	1540	1566	1583	1581	1584	1581	1598	1518	1495	1447	1381	1381	1385	1329	1306	1299	1272
3357026	Hepstedt	978	1008	996	989	987	994	986	999	1015	1065	1043	1032	1025	1049	1049	1035	1060	1074	1062	1044	998	936	883	862	834	834	849	856	859	853
3357027	Hipstedt	1234	1221	1245	1271	1237	1255	1237	1239	1255	1258	1313	1317	1328	1331	1326	1322	1306	1316	1313	1309	1294	1287	1238	1215	1206	1184	1184	1182	1204	1189
3357028	Horstedt	1274	1310	1302	1277	1293	1297	1292	1296	1284	1346	1337	1323	1360	1332	1361	1374	1363	1345	1301	1301	1228	1174	1164	1116	1114	1065	1067	1064	1037	1013
3357029	Kalbe	580	582	589	570	551	558	562	568	574	562	560	571	573	573	565	570	573	570	572	560	554	534	500	501	480	478	456	463	463	472
3357030	Kirchtimke	919	964	960	965	974	965	954	980	976	1000	993	1012	966	966	968	994	996	985	1016	993	1000	989	962	928	917	917	862	872	863	849
3357031	Kirchwalsede	1176	1171	1161	1150	1161	1166	1150	1155	1174	1228	1264	1268	1268	1271	1287	1275	1299	1265	1256	1256	1242	1226	1202	1207	1212	1178	1147	1130	1135	1114
3357032	Klein Meckelsen	914	895	895	905	902	887	895	905	898	960	953	953	935	939	923	895	869	858	852	852	862	867	851	834	825	790	785	774	783	778
3357033	Lauenbrück	2399	2328	2276	2234	2266	2235	2206	2178	2159	2163	2182	2183	2171	2163	2195	2147	2111	2071	2041	1979	1967	1979	1949	1903	1895	1858	1793	1738	1703	1674
3357034	Lengenbostel	454	452	458	460	455	439	450	451	458	472	472	460	475	478	459	457	441	457	454	441	439	416	419	410	417	417	414	419	418	420
3357035	Oerel	1817	1832	1882	1869	1860	1856	1810	1831	1820	1869	1867	1866	1879	1846	1885	1889	1881	1909	1918	1937	1926	1854	1827	1815	1814	1779	1787	1761	1733	1694
3357036	Ostereistedt	930	929	923	924	914	907	915	919	924	959	952	942	952	974	983	971	990	985	959	958	976	978	956	966	964	943	910	921	926	931
3357037	Reeßum	1765	1734	1712	1697	1679	1680	1677	1675	1655	1718	1724	1719	1727	1759	1757	1778	1746	1714	1717	1720	1687	1696	1633	1665	1641	1586	1529	1508	1476	1432
3357038	Rhade	1088	1074	1066	1116	1126	1086	1106	1119	1130	1168	1172	1189	1142	1152	1130	1126	1097	1093	1128	1137	1147	1141	1107	1071	1045	1038	1030	1008	1009	1006
3357039	Rotenburg (Wümme)	21956	21798	21694	21548	21392	21023	20944	21072	21082	21821	21830	21951	22103	22128	22088	22093	22024	21916	21834	21670	21512	21547	21468	21323	21202	20985	20622	20211	19689	19183
3357040	Sandbostel	778	764	771	808	822	818	822	797	804	834	841	838	837	830	806	828	809	777	775	764	778	754	770	759	739	713	709	703	698	708
3357041	Scheeßel	12988	13014	12934	13031	12946	12939	12917	12976	13005	12814	12834	12962	12929	12877	12904	12906	12817	12728	12654	12496	12352	11981	11821	11648	11465	11047	10892	10827	10640	10451
3357042	Seedorf	1036	1076	1098	1184	950	956	961	983	1045	894	776	716	746	621	616	609	619	627	629	630	637	592	602	594	609	586	567	577	565	556
3357043	Selsingen	3601	3607	3659	3689	3647	3571	3527	3518	3512	3424	3429	3415	3431	3416	3354	3365	3293	3276	3287	3271	3249	3220	3167	3144	3116	3059	2930	2875	2848	2805
3357044	Sittensen	5968	5899	5901	5783	5765	5641	5608	5596	5588	5505	5529	5510	5514	5487	5526	5536	5496	5531	5494	5446	5414	5359	5302	5292	5238	5023	4747	4569	4494	4373
3357045	Sottrum	6522	6470	6397	6366	6353	6310	6217	6240	6240	6053	6048	6112	6102	6040	6040	6005	6075	6020	5911	5847	5812	5749	5602	5415	5201	4891	4733	4587	4384	4313
3357046	Stemmen	826	821	817	828	844	849	858	858	885	902	905	921	942	904	916	920	919	892	883	877	887	876	818	798	794	767	757	737	749	742
3357047	Tarmstedt	3835	3841	3852	3848	3819	3732	3704	3681	3704	3508	3499	3545	3592	3558	3588	3625	3580	3544	3532	3507	3499	3366	3291	3220	3068	2938	2770	2764	2712	2627
3357048	Tiste	888	889	895	878	876	870	879	863	863	870	881	881	854	862	871	868	880	861	864	841	830	829	791	774	779	767	746	731	730	724
3357049	Vahlde	679	666	671	675	674	655	658	663	656	695	685	703	708	714	730	724	742	738	718	705	704	706	681	658	667	655	651	626	616	597
3357050	Vierden	760	741	746	739	768	747	752	754	779	832	847	839	838	819	829	815	789	799	786	770	758	735	737	714	710	705	674	652	648	626
3357051	Visselhövede	9598	9629	9747	9700	10199	9944	9919	10023	10137	10260	10309	10392	10485	10567	10640	10641	10757	10707	10790	10858	10818	10713	10662	10617	10559	10452	10467	10342	10320	10331
3357052	Vorwerk	1048	1037	1047	1026	1029	1041	1033	1049	1044	1058	1035	1083	1089	1088	1087	1106	1072	1061	1010	998	966	931	897	893	850	830	846	841	844	827
3357053	Westertimke	431	436	451	446	431	442	458	461	477	630	629	632	620	619	635	639	636	630	643	643	639	653	652	664	671	673	670	681	685	666
3357054	Westerwalsede	723	712	720	725	739	728	713	698	716	782	791	789	800	795	791	785	774	809	803	797	781	768	780	764	752	757	760	707	716	691
3357055	Wilstedt	1750	1752	1719	1731	1738	1712	1726	1709	1749	1742	1716	1675	1701	1727	1733	1734	1739	1761	1773	1766	1695	1664	1627	1619	1547	1552	1508	1530	1510	1498
3357056	Wohnste	739	749	761	784	773	779	775	779	788	786	794	799	813	800	803	807	815	811	783	795	790	766	725	725	713	690	682	680	683	680
3357057	Zeven	13822	13809	13756	13735	13692	13655	13593	13633	13531	13475	13339	13223	13105	12832	12631	12531	12446	12315	12137	12023	11888	11865	11939	11759	11635	11601	11565	11341	10931	10778
3358001	Ahlden (Aller)	1552	1526	1506	1415	1518	1529	1531	1598	1542	1536	1545	1505	1542	1519	1545	1558	1566	1559	1496	1491	1462	1498	1483	1430	1404	1367	1350	1330	1315	1293
3358002	Bispingen	6410	6464	6486	6411	6404	6266	6241	6231	6263	6219	6171	6256	6240	6274	6292	6302	6254	6224	6089	5971	5905	5860	5816	5756	5664	5560	5472	5373	5278	5153
3358003	Böhme	939	921	915	924	920	909	900	898	903	916	929	946	933	957	962	972	969	990	983	979	974	981	971	947	924	931	924	876	864	856
3358005	Buchholz (Aller)	2159	2164	2124	2157	2133	2070	2056	2054	2076	2060	2065	2090	2088	2071	2064	2034	1984	1945	1885	1771	1671	1607	1564	1516	1487	1468	1439	1436	1414	1399
3358006	Eickeloh	794	763	765	745	781	773	802	784	766	795	789	796	809	798	804	771	795	785	789	787	780	777	748	724	720	711	699	739	755	751
3358007	Essel	1168	1149	1134	1119	1100	1078	1069	1078	1072	1076	1080	1087	1099	1102	1095	1107	1083	1071	1079	1057	999	929	890	901	889	852	805	799	766	756
3358008	Bad Fallingbostel	11926	11852	11680	11413	11044	10748	10682	10682	10826	11404	11485	11608	11660	11692	11779	11820	11820	11808	11749	11709	11656	11674	11689	11670	11753	11455	11286	11056	11045	10837
3358009	Frankenfeld	517	516	502	507	522	508	509	515	504	549	561	555	566	565	580	591	565	567	580	563	546	540	551	552	558	565	556	545	548	537
3358010	Gilten	1240	1242	1224	1210	1205	1207	1206	1195	1181	1185	1193	1220	1208	1157	1180	1147	1137	1142	1140	1164	1163	1144	1148	1111	1065	1085	1069	1099	1093	1099
3358011	Grethem	627	624	631	622	646	636	660	641	659	672	665	660	660	673	670	678	680	683	672	655	658	654	648	640	638	643	640	640	622	615
3358012	Hademstorf	866	839	839	780	834	825	815	824	835	853	857	853	855	875	888	900	894	865	854	848	818	803	809	798	806	794	814	804	817	794
3358013	Häuslingen	775	780	808	799	795	819	803	819	829	884	872	884	882	895	885	885	869	880	867	846	865	871	896	884	913	899	897	867	851	846
3358014	Hodenhagen	3177	3205	3177	3088	3255	3203	3178	3169	3165	3155	3136	3157	3174	3193	3126	3151	3059	2953	2891	2841	2831	2741	2673	2617	2495	2364	2262	2169	2121	2103
3358015	Lindwedel	2647	2661	2631	2644	2618	2584	2593	2541	2558	2631	2604	2558	2600	2555	2486	2391	2370	2323	2285	2229	2165	2071	2025	1909	1772	1714	1607	1545	1464	1432
3358016	Munster	15160	15117	14983	14958	15091	15018	15139	14768	14688	16165	16428	16564	16728	17036	17187	17479	17795	17845	17724	17748	17958	18036	18059	18185	18029	17419	16888	16682	16567	16486
3358017	Neuenkirchen, Lüneburger Heide	5634	5590	5622	5578	5570	5509	5530	5553	5561	5715	5691	5710	5690	5729	5731	5726	5739	5786	5824	5758	5687	5668	5613	5527	5470	5427	5376	5415	5284	5219
3358018	Rethem (Aller)	2298	2337	2326	2324	2357	2342	2371	2357	2368	2252	2288	2313	2380	2380	2417	2467	2482	2486	2491	2509	2505	2505	2499	2508	2529	2520	2445	2466	2469	2447
3358019	Schneverdingen	18750	18662	18638	18624	18729	18676	18723	18696	18750	18837	18897	18997	19062	19072	19097	19040	19065	18931	18632	18422	18166	17895	17613	17245	17030	16974	16812	16635	16228	15941
3358020	Schwarmstedt	5745	5721	5713	5607	5489	5425	5353	5261	5302	5210	5233	5237	5353	5300	5294	5285	5141	5123	5078	5077	5036	5043	4966	4947	4888	4887	4840	4738	4590	4425
3358021	Soltau	21268	21317	21257	21324	21414	21178	21120	21094	21112	21829	21777	21831	21950	22001	22052	22032	21957	21979	21926	21906	21819	21566	21383	21272	21040	20802	20595	20238	20031	19714
3358023	Wietzendorf	4151	4162	4133	4128	4105	4074	4061	4071	4099	4023	4047	4104	4102	4057	4091	4057	4027	3950	3889	3799	3597	3500	3376	3257	3153	3010	2882	2855	2775	2709
3358024	Walsrode	30081	30038	30044	30155	30170	30206	30282	30311	30372	30902	30985	31059	31296	31516	31629	31591	31602	31469	31386	31189	30998	30918	31007	30732	30611	30451	30321	30252	29950	29761
3358501	Osterheide	2789	2105	1961	3109	3564	617	627	632	641	762	755	802	815	817	824	835	887	900	883	884	914	937	954	957	973	976	1023	1044	1052	1054
3359001	Agathenburg	1290	1236	1217	1177	1180	1193	1196	1161	1145	1154	1152	1133	1122	1112	1109	1085	1065	1012	1014	1022	1031	1023	1018	1029	1008	981	974	970	938	906
3359002	Ahlerstedt	5451	5367	5371	5355	5273	5151	5116	5104	5061	5056	5077	5111	5136	5128	5113	5039	5024	4985	4973	4928	4862	4792	4731	4696	4594	4525	4496	4477	4455	4393
3359003	Apensen	4351	4284	4225	4084	3945	3867	3707	3643	3580	3351	3286	3229	3196	3099	3015	3001	2968	2949	2922	2917	2932	2915	2897	2842	2865	2761	2650	2554	2455	2379
3359004	Balje	928	959	984	985	1017	999	1024	1002	1012	1051	1049	1068	1098	1118	1118	1128	1108	1107	1109	1092	1113	1111	1114	1135	1163	1170	1192	1221	1198	1198
3359005	Bargstedt	2041	2030	2039	2021	1987	2020	2020	2032	2023	2058	2060	2092	2095	2113	2089	2111	2113	2109	2079	2005	2006	1920	1822	1735	1679	1652	1646	1608	1566	1497
3359006	Beckdorf	2660	2678	2679	2651	2660	2582	2596	2585	2615	2580	2581	2556	2541	2545	2514	2501	2444	2358	2362	2354	2339	2289	2234	2215	2209	2154	2071	2006	1968	1943
3359007	Bliedersdorf	1781	1725	1720	1720	1717	1719	1721	1715	1717	1711	1714	1687	1676	1643	1657	1663	1666	1643	1640	1650	1627	1633	1606	1542	1522	1450	1385	1331	1344	1325
3359008	Brest	786	773	781	785	795	788	788	787	800	790	804	827	831	823	835	844	832	837	846	859	822	822	805	799	786	777	776	762	765	761
3359009	Burweg	1017	1007	1014	1022	1007	980	992	969	971	986	998	1012	1016	1007	996	1004	973	957	936	935	914	938	941	912	911	906	915	930	934	922
3359010	Buxtehude	40193	40150	39782	40033	40173	39792	39777	39685	39858	39748	39542	39522	39370	38882	38335	37901	37827	37466	37086	36699	36699	36531	36396	35755	35253	34392	33597	33046	32609	32276
3359011	Deinste	2027	2014	2004	2021	1978	1983	2016	2020	2047	2141	2156	2180	2184	2200	2204	2182	2162	2112	2101	1965	1931	1865	1807	1756	1719	1672	1704	1692	1612	1606
3359012	Dollern	2178	2118	2052	2072	2034	2008	1965	1914	1856	1809	1803	1768	1782	1747	1740	1728	1747	1767	1768	1757	1745	1792	1815	1801	1796	1755	1747	1723	1727	1740
3359013	Drochtersen	11176	11184	11164	11150	11292	11201	11284	11273	11249	11857	11929	11964	12138	12241	12247	12306	12286	12209	12212	12174	12124	11979	11789	11511	11446	11240	11131	11067	10929	10697
3359014	Düdenbüttel	1062	1033	1000	981	990	960	969	971	982	948	938	941	930	933	913	914	883	889	865	869	854	847	840	832	816	808	778	767	698	706
3359015	Engelschoff	719	750	761	768	763	736	756	763	760	751	738	750	755	757	763	755	729	741	759	735	715	704	692	696	703	706	697	680	687	681
3359016	Estorf	1403	1405	1415	1429	1428	1419	1387	1395	1409	1430	1454	1445	1486	1516	1535	1500	1496	1508	1482	1478	1466	1475	1456	1437	1471	1433	1376	1336	1336	1302
3359017	Fredenbeck	6027	5989	6060	6059	6019	5959	5958	5901	5863	5766	5795	5821	5839	5814	5829	5841	5812	5748	5737	5735	5604	5536	5367	5145	4906	4704	4534	4405	4260	4228
3359018	Freiburg (Elbe)	1869	1881	1858	1845	1872	1845	1873	1898	1934	1772	1794	1856	1830	1864	1876	1876	1929	1969	2038	2052	2116	2133	2154	2170	2178	2211	2214	2195	2218	2198
3359019	Großenwörden	462	455	457	465	454	456	474	484	485	444	460	459	470	482	486	490	476	467	478	477	492	490	474	486	471	468	460	454	452	447
3359020	Grünendeich	1892	1869	1899	1913	1871	1859	1867	1875	1866	1905	1907	1917	1918	1995	2012	2056	2073	2085	2052	2049	2081	2049	2081	2059	2037	2045	2020	2005	1963	1929
3359021	Guderhandviertel	1094	1113	1119	1119	1111	1130	1089	1091	1117	1195	1212	1210	1227	1233	1243	1250	1255	1272	1265	1259	1281	1250	1254	1280	1271	1225	1135	1099	1054	1017
3359022	Hammah	3124	3081	3102	3086	3066	3054	2964	2886	2840	2874	2867	2849	2817	2851	2869	2848	2824	2789	2765	2793	2705	2692	2669	2625	2542	2385	2255	2234	2194	2142
3359023	Harsefeld	13894	13489	13256	13133	12874	12636	12369	12170	12157	12330	12352	12247	12332	12386	12325	12310	12302	12255	12094	11888	11594	11119	10549	10466	10355	10030	9854	9609	9325	9160
3359024	Heinbockel	1373	1389	1414	1429	1420	1433	1445	1461	1485	1531	1527	1513	1535	1537	1558	1580	1572	1576	1549	1522	1463	1336	1213	1149	1079	1013	939	920	893	876
3359025	Himmelpforten	5499	5374	5263	5205	5127	5020	4990	4963	4934	4889	4906	4905	4856	4863	4881	4863	4792	4764	4739	4673	4572	4539	4435	4400	4337	4286	4198	4095	3940	3834
3359026	Hollern-Twielenfleth	3333	3373	3436	3419	3360	3349	3321	3337	3326	3335	3321	3310	3350	3342	3359	3351	3313	3322	3372	3370	3307	3273	3172	3190	3091	3105	3108	3200	3085	3057
3359027	Horneburg	6257	6161	6170	6162	6026	5786	5750	5743	5679	5551	5492	5528	5474	5518	5521	5565	5570	5594	5606	5633	5573	5486	5560	5601	5646	5631	5550	5475	5335	5127
3359028	Jork	12293	12183	11962	12136	12050	11746	11794	11696	11578	11758	11691	11805	11875	11950	11875	11810	11859	11706	11646	11583	11540	11566	11504	11385	11297	11030	10882	10687	10564	10424
3359029	Kranenburg	722	721	734	714	726	717	712	727	719	747	750	763	771	771	778	774	783	770	774	749	760	771	749	743	714	690	709	686	679	660
3359030	Krummendeich	475	474	489	495	490	491	492	508	509	450	466	476	485	487	472	492	488	496	493	515	529	542	528	547	548	545	552	568	554	558
3359031	Kutenholz	4622	4642	4698	4687	4661	4706	4726	4728	4768	4810	4784	4866	4893	4927	4944	4955	4986	4983	4972	4947	4804	4633	4581	4486	4485	4391	4349	4265	4231	4125
3359032	Mittelnkirchen	1133	1124	1082	1079	1076	1075	1017	1020	994	1013	1004	992	978	979	968	954	944	932	950	946	930	940	926	915	916	917	929	921	910	870
3359033	Neuenkirchen	822	797	799	816	838	846	842	839	842	853	850	849	840	820	815	796	793	785	759	752	747	736	742	731	707	697	709	700	738	707
3359034	Nottensdorf	1592	1535	1467	1441	1431	1413	1386	1367	1358	1432	1427	1404	1405	1441	1439	1430	1414	1405	1315	1262	1246	1242	1226	1208	1150	1065	1038	1012	971	968
3359035	Oederquart	1025	1029	1043	1047	1040	1072	1069	1076	1105	1138	1146	1165	1171	1188	1225	1236	1254	1257	1276	1301	1316	1327	1313	1317	1308	1334	1324	1332	1330	1320
3359036	Oldendorf	3017	3016	3016	2983	2982	2914	2876	2834	2859	2862	2871	2860	2872	2925	2920	2883	2863	2893	2855	2787	2837	2861	2759	2706	2650	2642	2631	2628	2573	2459
3359037	Sauensiek	2492	2449	2468	2404	2353	2357	2324	2295	2293	2303	2310	2304	2322	2285	2251	2241	2196	2114	2102	2096	2066	2072	2011	1990	1959	1923	1866	1764	1749	1735
3359038	Stade	47703	47533	47330	47194	46378	45772	45317	45218	45198	46159	46080	45918	45855	45908	45923	45682	45430	45229	45152	44929	44952	44952	45103	45237	45087	44641	44372	43740	43116	42487
3359039	Steinkirchen	1753	1736	1644	1593	1588	1497	1566	1563	1572	1604	1604	1613	1582	1629	1668	1683	1683	1717	1693	1704	1727	1732	1735	1725	1727	1746	1733	1737	1724	1668
3359040	Wischhafen	2976	2976	2962	2953	2956	2974	3004	3039	3042	3059	3071	3052	3052	3075	3050	3081	3117	3124	3089	3085	3082	3097	3077	3118	3148	3109	3088	3024	2951	2967
3360001	Altenmedingen	1469	1481	1489	1519	1555	1552	1550	1534	1538	1571	1581	1594	1606	1607	1589	1589	1609	1634	1639	1625	1645	1613	1600	1614	1596	1630	1621	1565	1556	1508
3360002	Bad Bevensen	9248	9122	9097	9190	9060	8933	8830	8788	8786	8634	8620	8631	8710	8786	8767	8748	8749	8799	8796	8852	8900	8765	8729	8757	8767	8786	8857	8787	8684	8737
3360003	Barum	760	777	779	787	788	799	811	822	829	790	835	845	879	879	881	844	851	869	846	836	830	824	811	827	813	849	839	839	819	786
3360004	Bienenbüttel	6711	6728	6731	6686	6644	6624	6533	6568	6632	6673	6662	6653	6670	6713	6763	6815	6753	6731	6672	6598	6529	6432	6286	5966	5717	5557	5458	5319	5301	5278
3360005	Bad Bodenteich	3741	3783	3743	3770	3761	3772	3780	3786	3813	3884	3894	3923	3954	4006	4025	4008	4020	4007	3987	4025	4029	4015	3918	3922	3803	3771	4018	3947	3904	3794
3360006	Ebstorf	5383	5316	5277	5342	5396	5301	5291	5370	5444	5300	5327	5394	5411	5437	5446	5409	5457	5443	5444	5361	5269	5196	5094	5024	4903	4790	4828	4723	4637	4544
3360007	Eimke	824	827	822	830	812	815	834	830	845	890	886	918	957	980	993	980	1027	1031	1043	1035	1011	1010	1010	1018	1003	969	964	965	942	955
3360008	Emmendorf	696	704	707	731	731	714	746	743	761	728	723	739	765	763	746	757	767	746	770	741	762	786	774	787	780	777	806	823	802	801
3360009	Gerdau	1378	1413	1424	1441	1449	1467	1465	1485	1480	1548	1535	1548	1583	1567	1585	1604	1620	1626	1628	1640	1665	1670	1715	1681	1694	1689	1712	1712	1703	1668
3360010	Hanstedt	918	921	885	874	891	901	926	925	928	902	914	921	960	980	996	995	1019	1034	1036	1039	1013	989	986	965	951	971	975	981	965	943
3360011	Himbergen	1679	1702	1701	1696	1709	1726	1719	1729	1747	1724	1744	1777	1795	1777	1781	1828	1845	1834	1842	1818	1806	1773	1817	1753	1705	1701	1702	1682	1594	1564
3360012	Jelmstorf	755	778	770	760	770	765	775	792	783	821	834	850	870	880	877	867	869	886	899	894	901	928	919	943	938	949	929	929	903	905
3360013	Lüder	1272	1266	1256	1260	1241	1233	1243	1248	1256	1276	1271	1290	1288	1315	1352	1361	1311	1329	1335	1289	1229	1250	1285	1281	1257	1247	1267	1248	1244	1239
3360014	Natendorf	725	739	741	732	756	745	741	783	798	820	826	838	856	850	859	845	839	810	807	829	847	837	787	781	779	792	796	786	805	797
3360015	Oetzen	1143	1160	1163	1158	1169	1179	1148	1147	1164	1226	1260	1293	1320	1339	1381	1364	1366	1348	1329	1363	1388	1336	1386	1353	1391	1430	1397	1386	1343	1334
3360016	Rätzlingen	469	475	475	472	467	463	479	487	483	512	508	487	513	502	508	520	512	521	515	510	497	498	492	479	488	491	490	492	493	473
3360017	Römstedt	784	816	783	801	779	784	772	803	785	787	816	809	805	839	867	851	855	824	832	839	833	850	844	851	843	828	798	787	782	732
3360018	Rosche	2013	1995	2034	2032	2036	2050	2074	2088	2069	2042	2036	2053	2070	2120	2109	2126	2170	2183	2225	2194	2163	2183	2136	2092	2155	2153	2176	2170	2142	2118
3360019	Schwienau	684	673	709	693	706	721	720	720	722	744	737	738	753	781	769	764	772	805	814	797	811	808	812	808	814	815	827	857	852	832
3360020	Soltendieck	978	1004	1017	1001	1020	1008	1016	1027	1009	1049	1037	1039	1064	1067	1052	1056	1044	1013	1034	1029	1054	1063	1109	1130	1142	1112	1144	1115	1096	1106
3360022	Stoetze	579	591	583	592	589	606	594	613	629	663	677	680	683	679	666	677	658	689	695	691	679	678	674	709	756	765	756	773	762	799
3360023	Suderburg	4588	4546	4602	4579	4549	4533	4558	4581	4585	4529	4559	4547	4628	4686	4692	4726	4736	4694	4685	4694	4667	4662	4638	4635	4599	4494	4406	4380	4369	4291
3360024	Suhlendorf	2391	2408	2456	2509	2510	2487	2507	2550	2566	2587	2589	2608	2612	2619	2671	2663	2686	2712	2725	2731	2748	2713	2718	2665	2653	2601	2524	2495	2406	2400
3360025	Uelzen	33536	33614	33673	33633	33782	33400	33269	33338	33467	34250	34302	34395	34691	34758	35005	35203	35082	35173	35215	35065	35169	35341	35314	35382	35526	35574	35512	35640	35597	35466
3360026	Weste	945	950	965	980	1006	1007	1008	990	1002	995	1031	1038	1025	1023	1041	1059	1053	1044	1031	1026	1032	1019	995	980	988	979	971	965	962	974
3360029	Wriedel	2354	2390	2398	2399	2414	2409	2433	2413	2439	2459	2485	2519	2584	2555	2558	2603	2607	2618	2643	2688	2668	2674	2640	2685	2655	2724	2692	2726	2675	2625
3360030	Wrestedt	6366	6393	6464	6494	6541	6539	6534	6641	6724	6616	6739	6813	6931	6950	6961	7009	7047	7061	7148	7076	7086	7044	7052	7088	7177	7065	6972	6935	6834	6821
3361001	Achim b Bremen	31923	31911	31834	31422	31156	30594	29991	29680	29598	30143	30040	30162	30181	30059	30141	30092	29918	29825	29681	29735	29888	30074	30001	30122	30050	29920	29771	29669	29345	28974
3361002	Blender	2885	2885	2879	2889	2856	2856	2883	2882	2902	2894	2931	2982	2999	3017	2986	2995	2971	2989	2909	2850	2733	2715	2633	2517	2438	2480	2430	2391	2357	2313
3361003	Dörverden	9009	8972	8964	9070	8993	8961	8933	9005	9011	9185	9177	9328	9420	9454	9542	9665	9715	9721	9688	9669	9649	9570	9575	9519	9456	9386	9329	9208	9125	8970
3361004	Emtinghausen	1464	1481	1500	1496	1504	1492	1529	1520	1531	1587	1583	1622	1637	1662	1658	1673	1658	1632	1674	1653	1654	1635	1640	1617	1567	1531	1464	1461	1438	1398
3361005	Kirchlinteln	9911	9956	9990	10034	10132	9962	10065	10069	10033	10420	10389	10389	10446	10464	10485	10432	10466	10446	10481	10341	10306	10158	10106	10044	9959	9855	9653	9419	9169	8989
3361006	Langwedel, Kr Verden	14432	14423	14415	14394	14414	14348	14359	14408	14421	14621	14628	14637	14665	14680	14631	14664	14735	14716	14593	14317	14113	13943	13534	13226	13020	12701	12367	12184	11781	11391
3361008	Ottersberg	12957	12905	12818	12733	12443	12332	12250	12218	12118	12055	12122	12027	12111	12084	12117	12135	12157	12110	12108	12040	11977	11840	11748	11473	11354	11187	10899	10583	10330	10056
3361009	Oyten	15863	15673	15649	15582	15604	15425	15413	15375	15356	15450	15379	15360	15254	15264	15288	15336	15322	15360	15195	15098	15144	15001	14904	14707	14491	14249	13844	13388	13010	12710
3361010	Riede	2821	2788	2767	2782	2742	2697	2694	2690	2695	2733	2749	2779	2767	2746	2758	2769	2730	2744	2701	2708	2604	2529	2493	2507	2466	2447	2409	2419	2402	2314
3361012	Verden (Aller)	27706	27661	27747	27539	26997	26854	26668	26626	26599	26802	26846	26737	26735	26973	26828	26899	26795	26669	26861	27082	26981	26952	26997	26946	26774	26266	25417	25124	24810	24589
3361013	Thedinghausen	8162	8137	8027	7901	7804	7694	7674	7656	7672	7478	7484	7537	7552	7562	7650	7607	7560	7481	7398	7327	7236	6993	6852	6684	6533	6468	6274	6216	6083	6012
3401000	Delmenhorst	77559	77607	77521	77045	76323	74804	74052	73588	73364	74361	74512	74751	75135	75320	75916	76094	75986	76083	76284	76644	76903	77368	77958	78238	78226	77899	77127	76848	75967	75154
3402000	Emden	49913	50195	50607	50486	50694	50016	49790	49751	49848	51616	51292	51562	51714	51742	51693	51670	51445	51351	51185	50963	51173	51448	51546	51470	51559	51805	52216	52120	51103	50735
3403000	Oldenburg (Oldenburg)	169077	168210	167081	165711	163830	160907	159610	158658	157706	162173	161334	160279	159563	159060	158565	158394	158340	157437	155908	154832	154125	154325	153531	152846	151382	149691	147701	146816	145161	143131
3404000	Osnabrück	165251	164748	164374	164070	162403	156897	156315	155625	154513	164119	163514	163286	162870	163020	163814	164489	165517	164561	164195	164101	164539	165283	166653	167326	168618	168050	168078	166837	165143	163168
3405000	Wilhelmshaven	76089	76278	76316	76201	75995	75534	75728	76545	76926	81324	81137	81411	82192	82797	83552	84118	84586	84751	84994	85287	86453	87590	88950	89604	90667	91230	91680	91906	91149	90561
3451001	Apen	11692	11600	11518	11447	11334	11163	11077	11151	11085	11033	11015	11021	10987	11001	11020	10964	10927	10864	10753	10671	10559	10471	10349	10265	10117	9947	9675	9535	9338	9178
3451002	Bad Zwischenahn	28896	28596	28507	28484	28204	27965	27866	27728	27531	27537	27437	27350	27285	27173	27101	26898	26815	26095	25826	25536	25298	24798	24617	24522	24362	24147	24188	24251	24022	23828
3451004	Edewecht	22453	22400	22270	22031	21827	21503	21291	21149	21049	21268	21193	21006	21093	21013	20797	20654	20369	20085	19871	19226	18617	18210	17782	17338	17000	16730	16268	15934	15652	15334
3451005	Rastede	22704	22666	22447	22244	22027	21623	21259	21059	21046	20817	20763	20716	20629	20522	20392	20145	20039	20035	19876	20008	20029	19929	19827	19384	19229	19142	19097	18928	18632	18526
3451007	Westerstede	22952	22778	22540	22399	22154	21987	21919	21927	21893	22003	21943	21964	22107	22117	21888	21915	21821	21750	21521	21417	21369	21305	21141	20947	20735	20472	19947	19475	18970	18659
3451008	Wiefelstede	16162	16031	16095	16093	15889	15676	15453	15475	15347	15346	15166	15045	14940	14800	14693	14600	14553	14335	14147	13792	13586	13300	12972	12506	12208	12054	11803	11628	11344	11212
3452001	Aurich (Ostfr.)	42040	41991	41854	41793	41489	41075	40637	40604	40606	40572	40491	40447	40496	40651	40594	40439	40440	40567	40362	40278	40124	40018	39914	39851	39519	38932	38299	37783	37187	36856
3452002	Baltrum	604	652	617	591	610	617	564	554	546	493	488	496	472	479	481	502	495	554	541	516	518	512	509	540	528	530	525	545	531	492
3452003	Berumbur	2773	2767	2749	2741	2700	2669	2620	2581	2594	2542	2516	2568	2581	2567	2545	2566	2543	2527	2489	2443	2422	2374	2334	2268	2230	2199	2129	2105	2057	2041
3452006	Großefehn	13982	13915	13926	13927	13837	13716	13646	13585	13532	13367	13344	13352	13265	13227	13208	13245	13157	13002	12953	12833	12594	12450	12284	12117	11909	11777	11602	11587	11490	11384
3452007	Großheide	8597	8557	8511	8538	8551	8537	8563	8558	8495	8652	8712	8752	8809	8772	8766	8771	8744	8664	8639	8575	8505	8376	8351	8328	8353	8243	8212	8131	8039	7928
3452008	Hage	6272	6310	6291	6254	6221	6152	6162	6119	6045	5888	5878	5796	5908	5871	5827	5842	5870	5893	5846	5767	5666	5610	5607	5503	5545	5496	5383	5335	5228	5170
3452009	Hagermarsch	431	415	428	419	431	445	445	425	432	436	438	445	464	458	455	471	455	460	490	496	567	575	606	585	602	609	604	638	541	504
3452010	Halbemond	1005	1001	1010	998	995	974	993	996	995	1055	1044	1066	1074	1067	1052	1055	1049	1057	1047	1006	1004	992	995	919	899	871	844	845	832	771
3452011	Hinte	7106	7117	7119	7092	7008	6977	6906	6919	6956	7018	7123	7119	7205	7271	7339	7314	7300	7338	7337	7311	7310	7225	7188	7223	7242	7249	7279	7215	7226	7217
3452012	Ihlow, Ostfriesl	12467	12418	12399	12315	12267	12200	12139	12067	12095	12475	12459	12520	12640	12627	12654	12605	12559	12465	12358	12257	12050	11861	11603	11375	11241	11031	10798	10666	10554	10552
3452013	Juist	1524	1515	1522	1571	1596	1589	1540	1553	1509	1700	1696	1721	1751	1766	1786	1801	1801	1857	1852	1788	1710	1715	1671	1654	1634	1631	1652	1643	1534	1507
3452014	Krummhörn	11977	11997	12165	12209	12123	12209	12228	12344	12469	12656	12693	12779	12950	13053	13152	13280	13374	13334	13323	13295	13327	13136	13079	13058	13075	12980	12958	12876	12792	12755
3452015	Leezdorf	1811	1849	1871	1891	1886	1871	1859	1831	1790	1928	1957	1968	1971	1941	1978	1970	1960	1970	1957	1984	1966	2028	1932	1944	1878	1810	1782	1727	1687	1752
3452016	Lütetsburg	719	716	734	737	753	758	758	762	741	781	768	782	782	803	780	761	767	732	729	716	672	651	653	668	664	651	658	645	651	652
3452017	Marienhafe	2397	2386	2360	2338	2336	2348	2253	2257	2223	2029	2053	2079	2068	2070	2066	2022	1993	1955	1962	1920	1866	1921	1905	1842	1819	1733	1672	1646	1651	1647
3452019	Norden	24873	25060	25056	25195	25117	24895	24887	24873	25010	25116	25044	25099	25280	25147	25122	25122	24943	24786	24845	24957	24931	24838	24683	24486	24328	24274	24131	24141	24040	23815
3452020	Norderney	6090	6089	6051	5981	5935	5875	5845	5820	5787	5816	5810	5866	5986	5919	5904	5996	5970	5992	6054	6090	6095	6129	6179	6257	6261	6347	6418	6405	6362	6215
3452021	Osteel	2162	2146	2188	2211	2211	2199	2201	2221	2216	2292	2292	2300	2320	2354	2346	2389	2371	2359	2381	2385	2410	2409	2370	2378	2380	2364	2323	2244	2166	2151
3452022	Rechtsupweg	2101	2069	2058	2027	2017	2058	2060	2057	2068	2098	2120	2111	2092	2073	2077	2085	2113	2105	2092	2081	2056	2021	1952	1907	1878	1881	1846	1819	1832	1804
3452023	Südbrookmerland	18319	18435	18513	18605	18573	18509	18509	18456	18549	19010	19062	19132	19224	19202	19060	19034	19040	18826	18756	18619	18332	18047	17818	17498	17132	16977	16684	16309	16017	15734
3452024	Upgant-Schott	3782	3848	3865	3852	3845	3833	3802	3815	3798	3848	3879	3874	3819	3825	3858	3842	3813	3790	3748	3677	3637	3606	3522	3433	3377	3311	3283	3140	3110	3054
3452025	Wiesmoor	13236	13141	13110	13116	13005	12878	12887	12790	12670	13389	13299	13261	13291	13215	13208	13132	13039	12923	12824	12645	12478	12282	12072	11919	11834	11681	11497	11399	11200	11000
3452026	Wirdum	999	1012	1039	1070	1057	1046	1029	1019	1048	1038	1055	1052	1078	1076	1067	1084	1093	1090	1095	1096	1089	1101	1078	1071	1075	1077	1073	1054	1037	1017
3452027	Dornum	4427	4442	4513	4595	4636	4568	4525	4467	4539	4748	4752	4796	4767	4818	4803	4782	4763	4731	4681	4666	4693	4685	4684	4722	4714	4736	4709	4623	4550	4503
3453001	Barßel	13039	12946	12972	12872	12714	12593	12495	12438	12432	12566	12486	12535	12570	12458	12377	12391	12480	12487	12431	12248	12195	12084	11971	11883	11759	11362	10916	10574	10216	9940
3453002	Bösel	8224	8016	7946	7709	7725	7583	7461	7489	7430	7533	7560	7519	7559	7560	7555	7499	7447	7384	7226	7165	7086	7008	6995	6848	6870	6667	6418	6283	6082	5931
3453003	Cappeln (Oldenburg)	7127	7104	6815	6816	6821	6561	6445	6532	6566	6620	6642	6641	6545	6392	6382	6304	6292	6311	6275	6429	6320	6117	6179	6119	6011	5768	5550	5429	5183	5011
3453004	Cloppenburg	35451	34913	34581	34216	33798	33221	32985	33084	32994	32571	32458	32278	32032	31757	31656	31374	30793	30422	30146	29897	29286	28941	28548	28033	27795	26622	25553	24707	23989	23574
3453005	Emstek	12254	12119	12087	11859	11855	11627	11513	11551	11479	11448	11379	11343	11422	11382	11316	11217	11035	10817	10446	10355	10250	10060	9770	9502	9319	8894	8323	8093	7802	7494
3453006	Essen (Oldenburg)	9078	9058	8958	8871	8676	8649	8490	8506	8334	8177	8250	8244	8227	8055	8097	8133	8184	8184	8267	8084	8129	8160	8176	8078	8055	7943	7723	7371	7112	6915
3453007	Friesoythe	22368	22456	22288	22082	21918	21670	21335	21110	20960	20641	20572	20599	20547	20615	20493	20369	20204	20100	20064	19861	19737	19504	19374	19191	18907	18432	18080	17649	17318	17142
3453008	Garrel	15139	15048	14918	14698	14634	14418	14102	14062	14041	13327	13083	13015	12888	12725	12614	12385	12177	12083	11868	11698	11453	11285	11080	10990	10829	10477	10249	9819	9438	9103
3453009	Lastrup	6955	6970	6985	6933	6902	6802	6664	6661	6710	6821	6782	6721	6748	6753	6668	6679	6676	6669	6657	6554	6525	6422	6265	6217	6152	6021	5846	5754	5697	5631
3453010	Lindern (Oldenburg)	4925	4905	4817	4746	4709	4681	4652	4613	4659	4621	4572	4614	4677	4713	4680	4648	4608	4654	4628	4614	4542	4510	4493	4516	4479	4372	4287	4173	4100	4038
3453011	Löningen	13477	13441	13366	13218	13270	13156	12932	12949	12882	13166	13231	13196	13303	13221	13216	13228	13091	13088	13026	13055	13023	12936	12877	12757	12722	12473	12187	11800	11530	11192
3453012	Molbergen	8944	8727	8653	8512	8429	8202	8053	7950	7797	7672	7587	7680	7756	7741	7718	7733	7509	7313	7248	6987	6797	6563	6427	6236	6060	5772	5511	5231	4967	4856
3453013	Saterland	13701	13645	13539	13398	13283	13187	13049	13088	13006	13031	12904	12883	12890	12869	12870	12844	12787	12787	12691	12700	12551	12441	12371	12310	12221	11749	11048	10331	9830	9614
3454001	Andervenne	894	889	888	886	882	879	869	875	881	911	908	922	931	928	937	935	930	925	906	899	886	866	862	858	853	878	882	857	843	845
3454002	Bawinkel	2481	2464	2399	2381	2407	2359	2355	2354	2339	2386	2386	2385	2393	2339	2336	2347	2321	2299	2271	2247	2233	2212	2248	2275	2253	2153	2105	2080	2042	2007
3454003	Beesten	1602	1592	1600	1589	1584	1597	1618	1638	1629	1666	1656	1688	1668	1688	1683	1700	1686	1665	1653	1644	1611	1586	1609	1604	1634	1612	1603	1596	1570	1539
3454004	Bockhorst	959	978	956	967	981	987	988	998	994	969	970	979	987	1009	1009	1014	1029	1021	1004	981	978	988	981	972	968	998	973	953	951	918
3454005	Börger	2794	2756	2753	2735	2749	2747	2732	2777	2712	2742	2774	2784	2801	2798	2743	2789	2768	2721	2698	2671	2673	2682	2669	2618	2570	2440	2375	2289	2223	2189
3454006	Breddenberg	800	807	820	815	802	788	776	785	762	776	786	796	788	810	795	786	779	768	764	760	741	752	725	679	648	631	608	580	558	550
3454007	Dersum	1443	1449	1458	1471	1476	1466	1500	1498	1477	1434	1437	1464	1443	1467	1467	1467	1457	1425	1446	1395	1369	1327	1327	1303	1325	1341	1325	1320	1301	1326
3454008	Dörpen	5392	5287	5270	5077	5025	4983	4926	4827	4803	4924	4891	4920	4868	4889	4814	4827	4816	4701	4644	4559	4422	4374	4336	4251	4136	3993	3906	3829	3564	3406
3454009	Dohren	1141	1117	1114	1096	1113	1097	1100	1094	1099	1132	1146	1136	1166	1180	1162	1147	1138	1149	1134	1124	1158	1137	1106	1099	1101	1106	1109	1114	1082	1061
3454010	Emsbüren	10199	10148	10150	10093	9939	9903	9901	9797	9797	9902	9856	9886	9853	9789	9778	9656	9563	9504	9565	9503	9416	9305	9191	9110	8942	8753	8625	8364	8251	8137
3454011	Esterwegen	5429	5411	5390	5373	5280	5179	5193	5220	5192	5166	5189	5219	5280	5218	5142	5153	5165	5123	5069	5068	4947	4912	4871	4901	4854	4639	4547	4382	4159	3965
3454012	Freren	5085	5023	5048	5033	5002	5000	4996	4980	5003	5100	5129	5113	5052	5077	5135	5144	5157	5165	5100	5040	5014	4934	4997	5027	5007	4651	4527	4525	4291	4152
3454013	Fresenburg	904	910	926	941	912	909	914	914	922	928	922	923	923	907	892	898	908	908	897	884	853	862	862	835	824	829	814	807	802	787
3454014	Geeste	11365	11341	11319	11299	11231	11260	11219	11222	11169	11308	11368	11337	11339	11310	11321	11302	11254	11228	10994	10924	10809	10671	10700	10628	10541	10321	10198	10028	9708	9543
3454015	Gersten	1225	1226	1238	1246	1224	1209	1226	1216	1224	1234	1223	1216	1215	1218	1215	1192	1209	1206	1177	1181	1216	1204	1215	1231	1234	1253	1220	1154	1143	1145
3454016	Groß Berßen	680	662	662	664	665	656	656	654	684	684	658	664	652	688	682	683	677	705	703	692	678	676	676	659	657	647	662	633	641	640
3454017	Handrup	818	818	819	822	836	841	858	860	867	879	890	896	890	887	880	879	886	872	874	874	867	865	858	864	840	846	829	836	824	829
3454018	Haren (Ems)	23881	23829	23665	23747	23545	23255	23090	22949	22801	22999	22996	23029	22940	22858	22720	22697	22564	22601	22389	22316	22211	22016	21864	21614	21450	20871	20166	19587	19087	18875
3454019	Haselünne	13029	12914	12847	12728	12656	12504	12448	12390	12375	12741	12861	12840	12787	12689	12556	12595	12552	12543	12458	12436	12299	12160	12013	11862	11783	11558	11358	11266	11124	11009
3454020	Heede	2523	2511	2492	2472	2441	2419	2367	2332	2368	2253	2265	2216	2229	2174	2202	2187	2208	2195	2176	2230	2189	2169	2138	2087	2035	1974	1873	1799	1649	1626
3454021	Herzlake	4533	4485	4415	4357	4371	4248	4229	4177	4297	4174	4057	4097	4111	4136	4083	4102	4027	4028	3975	3947	3897	3868	3843	3857	3756	3639	3560	3462	3394	3324
3454022	Hilkenbrook	773	784	789	783	792	806	809	814	833	844	846	830	839	844	822	820	805	805	778	770	752	748	750	719	731	740	730	688	671	650
3454023	Hüven	542	540	526	540	525	519	535	542	550	554	545	556	561	565	561	558	564	561	556	566	561	564	549	546	537	538	527	526	515	503
3454024	Klein Berßen	1152	1135	1123	1106	1102	1127	1116	1133	1138	1173	1176	1199	1197	1150	1165	1155	1149	1122	1116	1119	1098	1079	1097	1053	1042	1038	997	944	937	918
3454025	Kluse	1700	1696	1655	1595	1628	1587	1547	1570	1552	1502	1484	1495	1495	1487	1482	1506	1477	1488	1493	1472	1458	1468	1448	1427	1440	1433	1382	1340	1324	1316
3454026	Lähden	4725	4766	4848	4866	4797	4705	4628	4595	4587	4660	4587	4622	4708	4591	4620	4567	4457	4486	4327	4310	4271	4271	4214	4158	4131	4084	3983	3981	3904	3849
3454027	Lahn	863	887	883	895	906	897	878	888	880	916	908	931	926	901	883	895	864	879	884	889	865	868	865	879	882	849	844	808	734	721
3454028	Langen	1459	1438	1432	1422	1428	1451	1454	1446	1447	1437	1428	1433	1427	1411	1405	1388	1369	1355	1348	1338	1313	1301	1307	1305	1286	1268	1269	1240	1266	1226
3454029	Lathen	6711	6581	6478	6363	6235	6159	6099	6083	6035	5985	6029	5977	5943	5882	5881	5849	5807	5862	5740	5618	5554	5486	5395	5351	5127	4679	4417	4165	3894	3920
3454030	Lehe	979	977	988	1012	1012	999	1026	1042	1023	991	985	977	975	1001	991	971	957	972	962	941	892	881	863	825	808	811	775	764	784	782
3454031	Lengerich	2713	2694	2693	2684	2662	2658	2609	2655	2650	2606	2616	2629	2679	2634	2659	2649	2647	2615	2641	2656	2616	2643	2578	2543	2547	2513	2469	2435	2332	2306
3454032	Lingen (Ems)	54708	54422	54117	53905	53284	52503	52158	51832	51735	51177	51459	51625	51554	51417	51317	51318	51358	51423	51362	51684	52163	52147	52255	52289	52270	51746	51338	50632	49857	49137
3454033	Lorup	3171	3234	3191	3201	3172	3184	3166	3174	3273	3182	3050	3062	3155	3091	3048	2995	2987	2988	2956	2882	2884	2826	2853	2875	2893	2775	2733	2637	2527	2447
3454034	Lünne	1929	1905	1905	1887	1875	1877	1846	1858	1840	1868	1879	1867	1825	1794	1780	1801	1801	1768	1747	1733	1772	1712	1714	1595	1599	1535	1512	1537	1509	1496
3454035	Meppen	35313	35373	35267	34935	34918	34549	34109	33963	33909	34944	34773	34862	34868	34580	34313	34201	34048	33904	33764	33412	33190	32934	32657	32356	32093	31601	31228	30837	30603	30508
3454036	Messingen	1060	1057	1080	1067	1075	1058	1082	1093	1084	1091	1112	1105	1111	1184	1116	1121	1108	1084	1087	1066	1062	1049	1046	1050	1036	1075	1062	1048	1035	1035
3454037	Neubörger	1546	1511	1494	1523	1544	1544	1553	1555	1578	1540	1533	1578	1577	1580	1567	1530	1548	1528	1537	1521	1522	1513	1507	1495	1475	1448	1461	1414	1402	1361
3454038	Neulehe	798	791	781	783	774	762	755	757	731	697	718	709	727	731	719	720	713	709	690	683	674	669	656	668	657	650	634	613	583	566
3454039	Niederlangen	1261	1257	1234	1210	1215	1208	1214	1229	1240	1205	1204	1210	1220	1226	1212	1220	1201	1202	1183	1170	1144	1122	1106	1107	1070	1032	1016	1002	994	1007
3454040	Oberlangen	972	962	961	963	938	951	945	955	960	954	940	937	953	985	931	924	910	894	894	876	885	871	896	870	854	829	786	780	768	778
3454041	Papenburg	37766	37579	37030	36698	36690	35981	35614	35719	35194	35032	35073	35268	35226	34890	34684	34440	34245	34403	34266	34096	33731	33671	33692	33741	33624	32762	32416	31526	30740	30078
3454042	Rastdorf	1082	1090	1052	1053	1067	1015	1014	1015	1008	1009	1026	1028	1035	995	992	980	986	1006	987	995	998	1019	991	963	911	916	910	916	896	862
3454043	Renkenberge	695	686	696	717	732	715	696	709	699	709	698	716	713	687	687	690	686	656	662	674	675	651	632	634	625	626	624	625	607	595
3454044	Rhede (Ems)	4292	4218	4186	4154	4174	4175	4180	4204	4195	4222	4248	4261	4230	4263	4197	4162	4066	4070	4071	3948	3896	3925	3938	3969	3974	3906	3921	3893	3781	3741
3454045	Salzbergen	7839	7776	7715	7613	7570	7535	7495	7503	7527	7508	7548	7590	7539	7536	7476	7437	7440	7281	7256	7166	7105	6993	6956	6873	6825	6707	6585	6589	6513	6369
3454046	Schapen	2416	2395	2368	2355	2332	2327	2334	2354	2347	2460	2485	2494	2486	2472	2432	2437	2438	2432	2407	2354	2328	2276	2262	2207	2188	2053	1954	1926	1867	1855
3454047	Sögel	8029	8003	7928	7553	7464	7335	7303	7185	6944	7128	7073	7069	7022	6896	6773	6738	6700	6577	6586	6526	6522	6347	6380	6292	6154	5970	5690	5478	4953	4746
3454048	Spahnharrenstätte	1546	1521	1514	1541	1512	1511	1496	1470	1451	1451	1433	1408	1398	1392	1399	1410	1406	1438	1410	1393	1383	1380	1334	1362	1349	1328	1321	1317	1255	1232
3454049	Spelle	9545	9511	9309	9172	8971	8814	8688	8665	8602	8501	8489	8442	8406	8440	8405	8352	8208	8091	7948	7800	7674	7491	7382	7214	7051	6547	6145	5825	5519	5427
3454050	Stavern	1064	1052	1058	1051	1045	1066	1046	1070	1077	1098	1066	1056	1052	1069	1064	1060	1082	1077	1075	1098	1092	1095	1089	1073	1073	1085	1063	1041	1053	1052
3454051	Surwold	4265	4257	4261	4281	4245	4245	4263	4261	4294	4361	4346	4381	4414	4385	4364	4398	4374	4328	4374	4358	4252	4200	4147	4098	4044	3968	3790	3750	3635	3525
3454052	Sustrum	1373	1349	1328	1305	1291	1295	1298	1316	1334	1322	1327	1346	1289	1268	1255	1267	1253	1248	1216	1219	1179	1182	1145	1104	1101	1101	1075	1068	1064	1049
3454053	Thuine	1775	1785	1782	1794	1767	1770	1784	1768	1790	1934	1951	1994	1988	1960	1952	1953	1948	1934	1951	1936	1927	1954	1954	1915	1899	1825	1776	1762	1735	1717
3454054	Twist	9605	9545	9574	9563	9676	9499	9623	9667	9636	9606	9630	9621	9614	9641	9692	9658	9567	9497	9474	9426	9386	9285	9254	9206	9132	9021	8810	8749	8555	8419
3454055	Vrees	1777	1776	1762	1739	1767	1695	1656	1673	1657	1673	1622	1622	1651	1636	1597	1593	1549	1521	1452	1409	1367	1348	1345	1311	1335	1303	1237	1232	1174	1159
3454056	Walchum	1588	1566	1537	1506	1511	1457	1451	1474	1455	1447	1458	1420	1403	1409	1337	1294	1281	1263	1227	1236	1219	1203	1189	1160	1090	1090	1094	1105	1104	1104
3454057	Werlte	10149	10260	10211	10163	10077	9958	9728	9555	9483	9445	9397	9407	9438	9349	9205	9129	9104	8955	8876	8807	8727	8679	8527	8476	8362	7974	7567	7137	6689	6336
3454058	Werpeloh	1095	1147	1132	1084	1082	1036	1038	1017	1030	1093	1123	1123	1131	1107	1106	1107	1085	1066	1088	1100	1079	1077	1051	1038	1017	1007	977	966	950	941
3454059	Wettrup	533	546	565	571	568	575	565	560	561	539	564	563	557	565	568	576	581	584	580	587	584	592	582	580	572	585	587	593	585	585
3454060	Wippingen	968	968	954	946	944	923	927	929	910	884	901	901	885	892	879	876	871	861	830	825	812	800	799	782	778	731	719	707	712	699
3455007	Jever	14413	14301	14207	14201	14020	13892	13829	13826	13924	13932	13904	13863	13903	13910	13912	13923	13948	13961	13889	13742	13741	13690	13550	13559	13432	13354	13178	13152	13034	12899
3455014	Sande	8792	8835	8862	8904	8879	8872	9015	9044	9166	9161	9224	9229	9325	9395	9437	9453	9392	9426	9423	9433	9458	9428	9324	9118	8900	8935	8849	8866	8792	8792
3455015	Schortens	20381	20329	20451	20416	20321	20132	20191	20234	20339	20691	20801	21047	21171	21132	21189	21343	21336	21320	21371	21299	21240	21282	21219	21047	20837	20527	20266	20014	19796	19485
3455020	Wangerland	9182	9190	9275	9285	9213	9061	9127	9170	9244	10005	10020	10105	10103	10152	10145	10223	10163	10210	10206	10222	10071	10027	10002	9879	9854	9889	9892	9792	9848	9713
3455021	Wangerooge	1214	1263	1264	1264	1304	1321	1294	1269	1278	919	923	933	948	985	969	1035	1087	1093	1163	1179	1199	1205	1252	1260	1294	1317	1286	1240	1168	1089
3455025	Bockhorn, Jadebusen	8892	8821	8810	8719	8594	8525	8468	8484	8503	8603	8571	8647	8674	8731	8780	8765	8847	8771	8723	8597	8556	8472	8438	8313	8297	8204	8066	7974	7882	7781
3455026	Varel	24017	24001	23925	23936	23884	23538	23554	23640	23729	24587	24663	24801	24954	25084	25153	25204	25124	25034	24891	24771	24602	24508	24624	24569	24527	24453	24281	24178	24107	24076
3455027	Zetel	11813	11720	11715	11684	11685	11596	11615	11660	11674	11700	11745	11682	11701	11803	11827	11814	11760	11838	11736	11646	11468	11242	11010	10893	10788	10557	10549	10562	10465	10423
3456001	Bad Bentheim	15609	15486	15418	15353	15311	15104	15068	15063	15070	15567	15605	15682	15637	15654	15522	15491	15382	15258	14817	14620	14557	14492	14471	14405	14319	14181	14103	14097	13951	13953
3456002	Emlichheim	7312	7276	7361	7379	7366	7300	7102	7075	7114	6958	6906	6909	6876	6815	6788	6728	6661	6632	6559	6515	6417	6423	6452	6371	6293	6263	6252	6239	6186	6177
3456003	Engden	421	432	426	416	431	432	440	439	445	452	442	432	455	440	455	464	461	466	447	436	425	430	426	430	426	424	437	415	423	415
3456004	Esche	579	564	554	555	556	573	567	575	578	563	583	574	577	578	582	576	562	567	549	527	539	542	545	530	536	534	526	531	535	529
3456005	Georgsdorf	1216	1211	1214	1230	1251	1280	1263	1303	1312	1305	1324	1344	1343	1346	1355	1345	1305	1298	1295	1288	1277	1270	1247	1225	1208	1181	1175	1188	1187	1158
3456006	Getelo	531	535	522	540	564	550	548	527	544	671	675	676	729	663	656	682	664	651	670	651	657	660	660	676	656	651	663	677	655	662
3456007	Gölenkamp	579	580	585	585	592	588	591	596	611	631	624	628	621	631	630	640	637	627	633	635	647	650	644	670	674	680	673	679	676	674
3456008	Halle	666	666	666	659	648	663	663	673	667	651	651	662	660	667	656	657	633	647	677	669	667	699	703	724	717	705	720	736	703	709
3456009	Hoogstede	2844	2857	2890	2883	2879	2870	2882	2908	2901	2890	2929	2912	2948	2910	2859	2849	2856	2874	2837	2814	2785	2778	2793	2775	2774	2770	2751	2715	2710	2680
3456010	Isterberg	580	573	581	580	566	581	584	590	593	612	613	625	635	635	618	612	618	631	630	639	639	640	640	635	630	625	640	650	639	644
3456011	Itterbeck	1756	1782	1760	1760	1747	1760	1773	1801	1813	1775	1773	1786	1780	1777	1794	1815	1800	1779	1758	1720	1683	1687	1668	1692	1694	1702	1692	1681	1676	1690
3456012	Laar	2129	2139	2111	2140	2161	2132	2149	2159	2147	2205	2202	2221	2220	2265	2184	2150	2131	2140	2098	2087	2089	2074	2114	2114	2092	2083	2118	2099	2090	2096
3456013	Lage	1029	1048	1053	1063	1064	1059	1057	1078	1093	1014	1013	1001	1026	1009	1020	1013	1025	1010	995	989	971	969	950	944	927	909	917	930	933	936
3456014	Neuenhaus	10049	10025	9907	9925	9894	9813	9782	9773	9831	9728	9740	9849	9797	9708	9745	9701	9641	9488	9386	9329	9202	9134	9004	8931	8867	8681	8586	8394	8342	8217
3456015	Nordhorn	53711	53403	53278	53286	53285	52579	52298	52380	52085	53052	53353	53401	53259	53156	53085	52950	52705	52615	52479	51968	51787	51649	51521	51313	51269	51179	50835	50580	49869	49359
3456016	Ohne	582	586	595	579	587	572	583	584	581	571	584	589	597	592	596	598	580	594	567	560	555	554	552	543	536	522	522	529	524	501
3456017	Osterwald	1192	1181	1184	1165	1172	1171	1172	1166	1173	1180	1163	1159	1167	1171	1157	1175	1174	1195	1212	1200	1193	1193	1211	1195	1207	1209	1212	1224	1219	1229
3456018	Quendorf	598	588	569	553	543	548	553	549	552	572	578	576	572	558	558	574	561	542	541	540	536	536	530	525	523	531	521	526	526	535
3456019	Ringe	2014	2032	2066	2095	2101	2090	2098	2118	2111	2194	2179	2141	2169	2159	2170	2160	2129	2075	2020	2012	2012	1989	2000	1965	1947	1965	1968	1919	1889	1873
3456020	Samern	773	757	752	731	728	745	742	719	697	726	716	717	705	699	683	707	712	702	694	677	666	683	695	694	704	691	703	699	692	690
3456023	Uelsen	5687	5615	5597	5565	5558	5468	5458	5421	5467	5438	5418	5394	5344	5292	5321	5144	5091	5012	4871	4805	4754	4672	4657	4579	4499	4376	4264	4239	4154	4111
3456024	Wielen	516	530	522	534	543	551	558	580	587	565	582	593	589	600	607	614	630	650	637	644	632	610	622	625	625	601	607	612	609	598
3456025	Wietmarschen	12336	12220	12166	12019	11863	11765	11710	11586	11423	11474	11389	11273	11209	11143	11020	10904	10790	10679	10538	10352	10222	10006	9654	9464	9161	8771	8545	8342	8184	7977
3456026	Wilsum	1577	1586	1572	1599	1607	1589	1600	1618	1624	1652	1670	1654	1707	1718	1636	1615	1602	1596	1579	1563	1552	1518	1514	1490	1492	1499	1503	1524	1506	1508
3456027	Schüttorf	12876	12839	12617	12676	12627	12510	12366	12342	12404	12607	12661	12639	12676	12651	12640	12620	12533	12514	12481	12471	12417	12252	12208	12059	11845	11614	11221	10869	10664	10534
3457002	Borkum	5078	5125	5118	5189	5473	5225	5175	5132	5155	5133	5186	5266	5323	5438	5444	5487	5521	5559	5587	5650	5695	5731	5792	5850	5921	5970	5899	5828	5832	5714
3457003	Brinkum	803	782	750	746	711	713	700	697	700	650	646	638	638	635	637	656	683	677	682	667	660	666	640	624	615	612	602	580	576	583
3457006	Detern	2760	2780	2766	2758	2735	2702	2673	2660	2670	2693	2698	2710	2686	2653	2645	2623	2621	2556	2547	2499	2501	2468	2396	2402	2322	2297	2254	2199	2155	2156
3457008	Filsum	2151	2141	2135	2133	2089	2076	2094	2113	2101	2084	2082	2072	2086	2136	2147	2137	2129	2124	2088	2044	2015	2001	1985	1958	1937	1924	1879	1871	1850	1820
3457009	Firrel	834	820	813	803	816	804	816	827	808	845	827	826	840	841	816	807	802	787	796	795	794	781	749	745	729	726	721	721	707	714
3457010	Hesel	4553	4596	4624	4595	4600	4567	4520	4465	4415	4096	4113	4137	4156	4193	4185	4115	4140	4079	4015	3948	3850	3682	3569	3570	3553	3548	3458	3387	3345	3309
3457011	Holtland	2233	2242	2259	2267	2238	2242	2260	2207	2215	2320	2330	2338	2335	2310	2267	2255	2243	2238	2232	2217	2240	2224	2259	2222	2231	2184	2195	2181	2170	2151
3457012	Jemgum	3629	3581	3583	3564	3539	3564	3597	3617	3662	3643	3622	3679	3643	3677	3720	3740	3754	3774	3720	3800	3809	3783	3792	3758	3767	3779	3824	3840	3844	3848
3457013	Leer (Ostfriesland)	34786	34486	34226	34129	34042	33925	33891	33851	33995	34301	34288	34154	34052	34128	33936	33682	33979	34088	34109	33849	33600	33437	33109	32909	32622	32270	32167	31983	31573	31375
3457014	Moormerland	23567	23426	23474	23236	23138	22783	22667	22553	22566	22382	22456	22500	22476	22495	22448	22398	22361	22220	21993	21801	21711	21437	21206	21020	20726	20385	20098	19790	19551	19285
3457015	Neukamperfehn	1713	1736	1710	1693	1647	1613	1594	1587	1582	1650	1639	1667	1638	1659	1643	1649	1599	1611	1562	1546	1498	1482	1490	1451	1430	1370	1362	1361	1307	1280
3457016	Nortmoor	1785	1774	1756	1737	1702	1666	1653	1660	1621	1676	1651	1658	1653	1669	1665	1660	1666	1647	1610	1605	1579	1567	1578	1509	1497	1473	1431	1468	1444	1412
3457017	Ostrhauderfehn	11318	11289	11198	11086	11032	10949	10750	10559	10452	10658	10635	10606	10683	10688	10676	10724	10683	10668	10534	10448	10320	10229	10054	9985	9792	9396	9046	8850	8605	8442
3457018	Rhauderfehn	18212	18032	17850	17857	17815	17373	17162	17283	17257	17293	17274	17309	17269	17305	17303	17235	17158	16964	16870	16574	16449	16210	16011	15772	15459	15136	14946	14834	14570	14339
3457019	Schwerinsdorf	686	698	697	705	694	695	705	722	726	752	747	756	756	768	767	758	759	756	762	755	752	740	725	722	706	724	712	716	725	735
3457020	Uplengen	11817	11778	11805	11783	11678	11518	11503	11390	11359	11467	11469	11448	11495	11456	11415	11335	11281	11227	11097	10962	10791	10716	10618	10558	10485	10358	10221	9985	9773	9663
3457021	Weener	15946	15842	15578	15541	15510	15499	15430	15550	15479	15710	15711	15676	15858	15762	15652	15666	15625	15534	15406	15338	15325	15203	15146	15047	14909	14738	14611	14557	14377	14320
3457022	Westoverledingen	21210	21019	20912	20775	20482	20269	20036	19820	19698	19828	19915	19936	19923	20016	20091	20081	19996	19787	19731	19521	19398	19096	18757	18453	18139	17885	17553	17321	17155	17006
3457024	Bunde	7675	7662	7692	7656	7607	7626	7566	7509	7530	7524	7548	7571	7578	7518	7599	7514	7540	7493	7424	7406	7326	7224	7175	7166	7217	7288	7271	7294	7195	7192
3458001	Beckeln	760	754	777	775	789	801	803	811	828	824	827	830	851	850	846	861	839	826	835	832	810	810	798	811	809	814	817	792	803	798
3458002	Colnrade	760	766	773	781	785	807	784	780	787	801	833	840	844	867	853	872	855	855	854	838	813	814	822	789	805	792	825	799	788	766
3458003	Dötlingen	6273	6259	6177	6217	6212	6168	6069	6090	6046	6130	6103	6071	6093	6060	6035	6029	6047	5973	5925	5871	5830	5685	5574	5428	5285	5109	5029	4925	4814	4688
3458004	Dünsen	1156	1166	1196	1172	1187	1167	1157	1181	1169	1185	1173	1195	1192	1207	1227	1252	1256	1262	1258	1252	1226	1229	1201	1215	1193	1123	1017	1005	1049	1042
3458005	Ganderkesee	31360	31137	31100	31119	30943	30586	30460	30412	30293	30941	30896	30753	30875	30825	30969	30924	30971	30809	30590	30207	29847	29717	29583	29202	28895	28759	28474	28053	27562	27104
3458006	Groß Ippener	978	999	1006	996	1016	1017	1039	1014	1043	1125	1140	1155	1192	1167	1148	1144	1150	1157	1149	1124	1126	1060	1057	1065	1039	1020	1030	1009	988	962
3458007	Großenkneten	16027	15736	15530	15276	15208	14687	14270	14106	14048	14232	13712	13576	13756	13701	13773	13730	13643	13590	13371	13252	12953	12660	12441	12262	12184	11933	11805	11640	11408	11185
3458008	Harpstedt	4727	4690	4708	4736	4682	4637	4621	4693	4726	4434	4452	4454	4490	4542	4596	4538	4527	4497	4445	4471	4450	4390	4345	4130	4103	3991	3942	3894	3784	3703
3458009	Hatten	14154	14111	14201	14084	13986	13867	13742	13648	13645	13974	13932	13847	13822	13701	13534	13377	13224	12954	12838	12641	12469	12057	11936	11708	11483	11069	10908	10666	10503	10264
3458010	Hude (Oldenburg)	16111	16248	16335	16361	16166	15965	15890	15853	15829	15777	15785	15814	15733	15715	15715	15615	15564	15563	15418	15295	15023	14572	14103	13872	13729	13356	13047	12795	12581	12383
3458011	Kirchseelte	1155	1161	1176	1199	1176	1176	1177	1164	1170	1263	1249	1260	1258	1260	1265	1258	1252	1247	1262	1254	1265	1233	1246	1230	1223	1160	1153	1193	1060	1009
3458012	Prinzhöfte	651	648	668	683	691	685	684	693	705	770	770	752	754	752	730	739	731	753	744	744	733	717	666	669	694	714	720	720	735	740
3458013	Wardenburg	16138	16012	16005	15975	15804	15616	15646	15545	15538	15980	16003	15968	16021	16098	16114	15995	15929	15841	15754	15588	15320	15212	15120	14848	14612	14560	14546	14415	14199	13921
3458014	Wildeshausen	20129	19932	19751	19560	19390	19044	18868	18866	18888	19209	19042	18766	18597	18554	18275	18180	17914	17717	17442	16985	16763	16478	16426	16287	16192	15834	15584	15215	14680	14311
3458015	Winkelsett	511	525	521	550	573	575	568	557	550	637	654	662	653	650	651	661	662	660	665	663	674	666	667	671	676	680	682	673	652	633
3459001	Alfhausen	4012	3921	3899	3895	3910	3821	3782	3812	3776	3801	3820	3815	3763	3766	3807	3847	3792	3683	3658	3535	3444	3423	3485	3519	3512	3270	2906	2777	2655	2551
3459002	Ankum	7568	7562	7536	7441	7314	7297	7221	7153	7104	7204	7165	7216	7228	7194	7216	7200	7180	7175	7107	7011	7025	6979	6941	6741	6596	6378	6056	5805	5455	5255
3459003	Bad Essen	15738	15645	15449	15389	15263	15111	15013	15040	15102	15612	15706	15753	15852	15759	15778	15807	15699	15668	15575	15480	15328	15149	14980	14942	14876	14467	14146	13877	13345	12967
3459004	Bad Iburg	10636	10661	10599	10630	10548	10579	10571	10528	10586	11560	11519	11519	11433	11534	11535	11682	11642	11733	11681	11708	11727	11506	11516	11430	11371	11283	10991	10719	10636	10416
3459005	Bad Laer	9110	9228	9264	9293	9268	9272	9212	9142	9136	9144	9181	9248	9251	9242	9181	9200	9200	9251	9092	8913	8751	8756	8532	8273	7893	7589	7390	7159	6766	6497
3459006	Bad Rothenfelde	8470	8317	8220	8004	7839	7776	7647	7581	7530	7443	7346	7351	7299	7323	7299	7209	7219	7084	6990	6901	6750	6581	6455	6371	6236	6220	6369	6437	6345	6107
3459007	Badbergen	4577	4594	4604	4567	4598	4565	4469	4496	4395	4556	4578	4560	4598	4613	4608	4486	4557	4519	4575	4514	4470	4336	4369	4351	4301	4213	4198	4144	4104	4091
3459008	Belm	13788	13750	13729	13594	13581	13519	13553	13569	13420	13583	13717	13806	13907	13893	13818	13960	14018	14143	14017	14012	14081	14085	14106	14286	14359	14298	13220	12264	12165	11824
3459009	Berge	3531	3547	3517	3522	3493	3528	3558	3610	3616	3696	3726	3715	3707	3727	3734	3745	3697	3704	3675	3682	3686	3606	3578	3593	3564	3473	3390	3337	3307	3289
3459010	Bersenbrück	8618	8501	8454	8436	8315	8146	7971	7894	7841	7946	7964	7961	8007	7962	7842	7893	7864	7771	7762	7751	7666	7644	7547	7564	7391	6773	6671	6455	5990	5767
3459011	Bippen	2932	2949	2958	2948	2925	2893	2885	2953	2969	2994	3006	3006	3027	3050	3054	3052	3008	3055	3039	2987	2949	2969	2984	3020	2906	2821	2738	2683	2627	2619
3459012	Bissendorf	14630	14655	14636	14362	14370	14392	14299	14355	14346	14263	14295	14331	14402	14444	14377	14384	14350	14299	14221	14100	13976	13924	13834	13708	13498	13350	13021	12899	12714	12673
3459013	Bohmte	12687	12689	12612	12634	12637	12643	12621	12665	12706	12935	13024	13158	13257	13315	13318	13303	13209	13267	13280	13191	13044	12909	12623	12572	12352	11903	11611	11322	10995	10695
3459014	Bramsche	31141	30952	30992	31110	36013	30583	30134	30098	30217	30986	31033	31152	30936	30920	31006	31013	30785	30171	31030	30633	32258	31820	31699	30121	30724	28937	27561	27221	28774	28120
3459015	Dissen am Teutob. Wald	9998	9882	9689	9539	9390	9270	9342	9374	9334	9271	9291	9330	9303	9323	9322	9330	9267	9270	9210	9222	9154	9107	8993	9008	9010	8945	8803	8812	8684	8401
3459016	Eggermühlen	1723	1749	1734	1714	1703	1711	1714	1722	1721	1735	1738	1765	1768	1790	1832	1819	1834	1878	1876	1833	1783	1762	1723	1757	1689	1554	1489	1460	1389	1312
3459017	Fürstenau	9407	9439	9500	9398	9322	9186	9118	9137	9201	9800	9828	9823	9928	9984	10054	9984	9933	9946	9899	9896	9934	9932	9953	9920	9819	9553	9218	8965	8835	8606
3459018	Gehrde	2533	2545	2539	2488	2504	2487	2485	2500	2486	2507	2515	2487	2465	2482	2491	2455	2424	2458	2389	2282	2222	2151	2141	2101	1997	1770	1664	1630	1576	1544
3459019	Georgsmarienhütte	31756	31827	31624	31594	31520	31543	31616	31765	31984	32057	32130	32289	32351	32505	32536	32650	32736	32911	32905	32872	32933	32909	32859	32821	32909	32933	32948	32835	32352	31910
3459020	Hagen am Teutoburger Wald	13475	13465	13412	13483	13475	13445	13437	13532	13629	14001	14099	14192	14175	14179	14265	14200	14180	14175	14160	14219	14129	14145	14176	14046	13958	13772	13652	13356	12915	12581
3459021	Hasbergen	11016	10936	10944	10936	10901	11000	11009	10946	10965	11034	11149	11167	11192	11159	11141	11132	10945	10859	10885	10851	10859	10825	10794	10754	10494	10213	10065	10020	9797	9717
3459022	Hilter am Teutob. Wald	10388	10361	10383	10322	10243	10187	10165	10172	10205	10228	10206	10222	10277	10247	10174	10170	10162	10152	10104	9957	9901	9812	9730	9762	9640	9515	9401	9184	9040	8908
[truncated: 8,777 more rows]

## Sheet: Übersicht_Gebietsänderungen
1060048	Klein Gladebrügge	1060102	Groß Gladebrügge
1060054	Lentföhrden	1060054	Lentföhrden
1060073	Schmalfeld	1060054	Lentföhrden
1060091	Traventhal	1060102	Groß Gladebrügge
1061017	Breitenburg	1061079	Oelixdorf
1061079	Oelixdorf	1061079	Oelixdorf
7134081	Sensweiler	7134081	Sensweiler
7134502	Langweiler	7134081	Sensweiler
7135052	Laubach, Eifel	7135052	Laubach, Eifel
7135502	Leienkaul	7135052	Laubach, Eifel
7137102	Trimbs	7137112	Welling
7137112	Welling	7137112	Welling
7137208	Hatzenport	7137214	Löf
7137214	Löf	7137214	Löf
7140112	Oberwesel	7140112	Oberwesel
7140155	Urbar	7140112	Oberwesel
7143501	Elbingen	7143501	Elbingen
7143502	Mähren	7143501	Elbingen
7336039	Herchweiler	10046111	Freisen
10046111	Freisen	10046111	Freisen
12066064	Frauendorf	12066316	Tettau
12066316	Tettau	12066316	Tettau
13071011	Blankensee	13071011	Blankensee
13071025	Carpin	13071011	Blankensee
13072004	Altkalen	13072004	Altkalen
13072055	Klein Upahl	13072067	Lohmen
13072067	Lohmen	13072067	Lohmen
13072096	Schwasdorf	13072004	Altkalen
13072097	Selpin	13072105	Tessin, Stadt
13072105	Tessin, Stadt	13072105	Tessin, Stadt
13074006	Bibow	13074082	Ventschow
13074018	Dechow	13074068	Roggendorf
13074068	Roggendorf	13074068	Roggendorf
13074082	Ventschow	13074082	Ventschow
13075034	Garz	13075152	Zirchow
13075152	Zirchow	13075152	Zirchow
13076036	Dümmer	13076153	Wittendörp
13076153	Wittendörp	13076153	Wittendörp
16063094	Moorgrund	16063003	Bad Salzungen, Stadt
16065023	Greußen, Stadt	16065089	Greußen, Stadt
16065082	Wolferschwenda	16065089	Greußen, Stadt
16065084	Großenehrich, Stadt	16065089	Greußen, Stadt
16066025	Friedelshausen	16066086	Wasungen, Stadt
16066042	Meiningen, Stadt	16066042	Meiningen, Stadt
16066086	Wasungen, Stadt	16066086	Wasungen, Stadt
16066093	Rhönblick	16066042	Meiningen, Stadt
16077032	Meuselwitz, Stadt	16077032	Meuselwitz, Stadt
16077048	Treben	16077032	Meuselwitz, Stadt

## Sheet: Impressum
Table compiled by Tim Leibert, Leibniz-Institute for Regional Geography, with support from Nina Schumacher and Manuel Wolff, HU Berlin, based on data provided by the Statistical Offices of the Länder.
